# Supplementary material
Source: PubMed Central journal article supplement (PMC7971188)
Supplement: NIHMS1674445-supplement-Supporting_information.pdf [file NIHMS1674445-supplement-Supporting_information.pdf]

a)

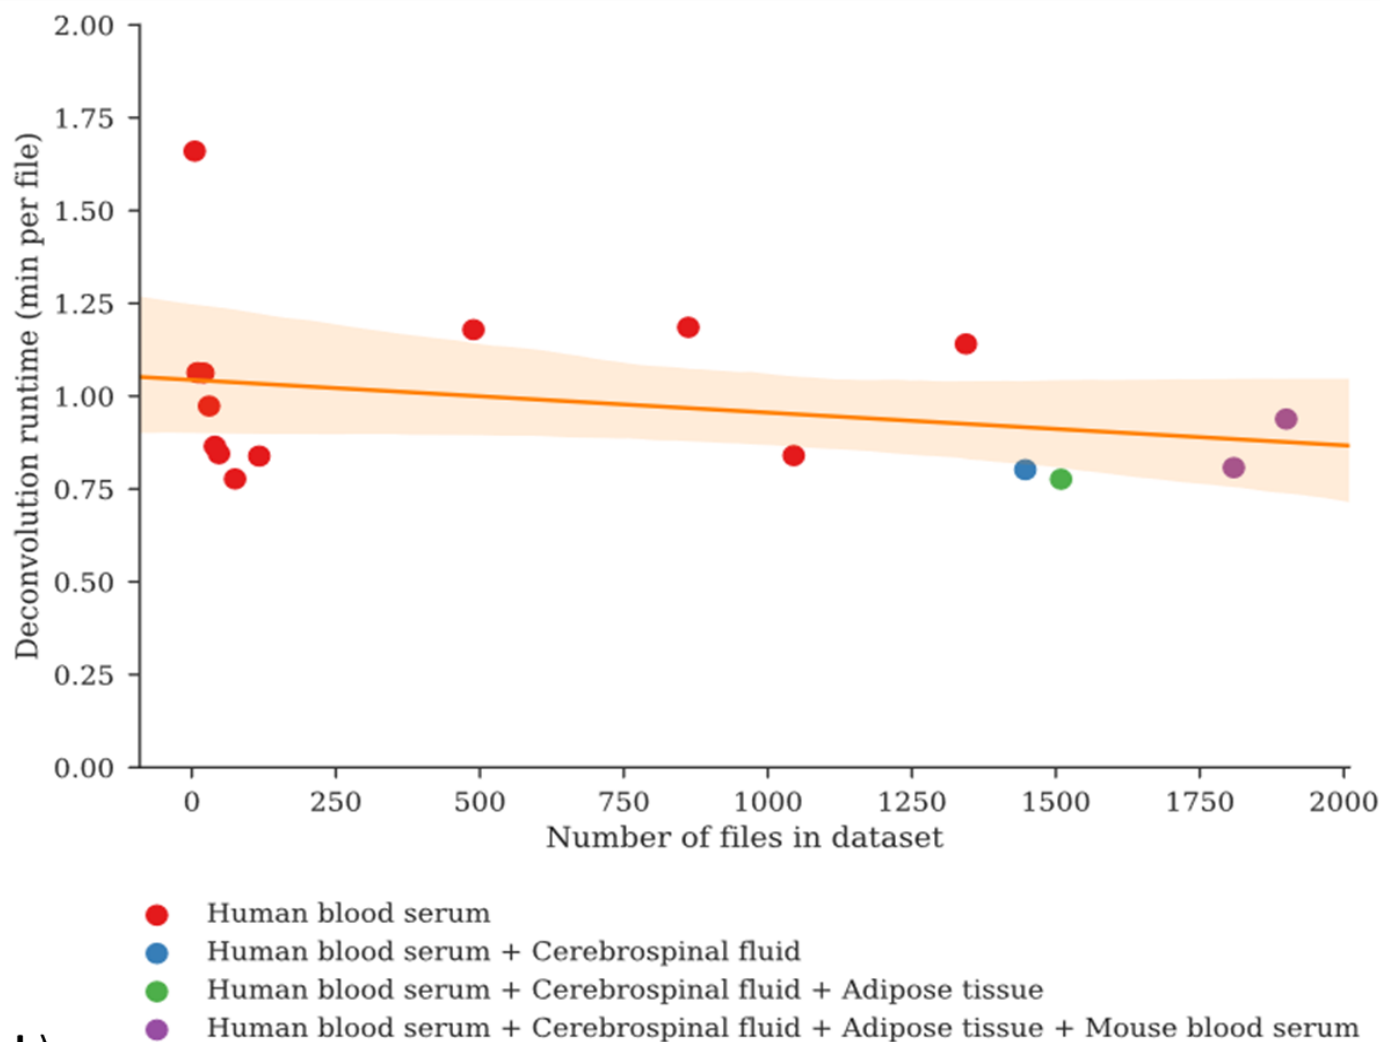

b)

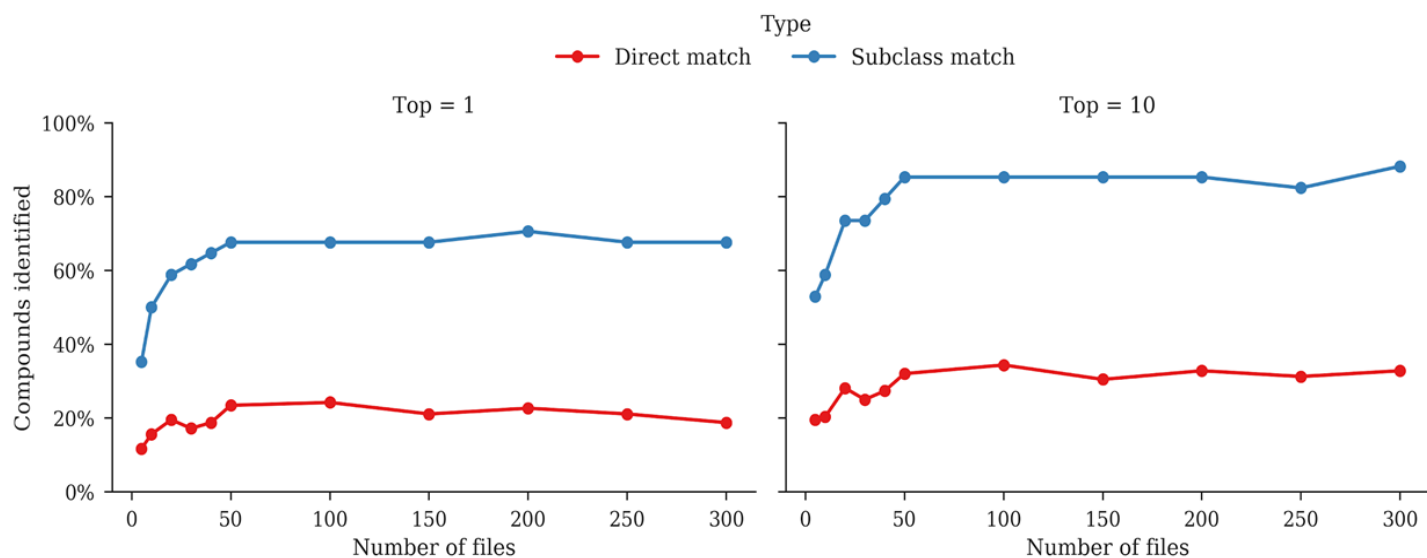

**Figure S1. MSHub performance evaluation.** a) MSHub analysis times per file in the dataset. The data collected using identical protocols have been processed by the GNPS MSHub workflow with the increasing number of files included in the dataset (UCD1 - UCD16, **Supplemental Table S1**). The human blood serum files only have been included initially followed by adding cerebrospinal fluid, adipose tissue and mouse blood serum samples. The graph is generated as described in the “Methods” section. b) The annotation percentage of the “known” (curated) compounds for subsets (**Table S8**) of the MSV000084039 dataset (Metabolomics Workbench ST001154, derivatized mouse blood serum) (**Table S6**). The ways data are subsetted can impact the results as different files contain different amounts of information (the randomness is mitigated when considering top 10 matches instead of top 1). For this dataset, it appears that MSHub is able to extract additional information for up to 50-100 files. The magnitude of increase is similar for top 1 and top 10 and is ~15% for direct match and ~33% for compound subclass.

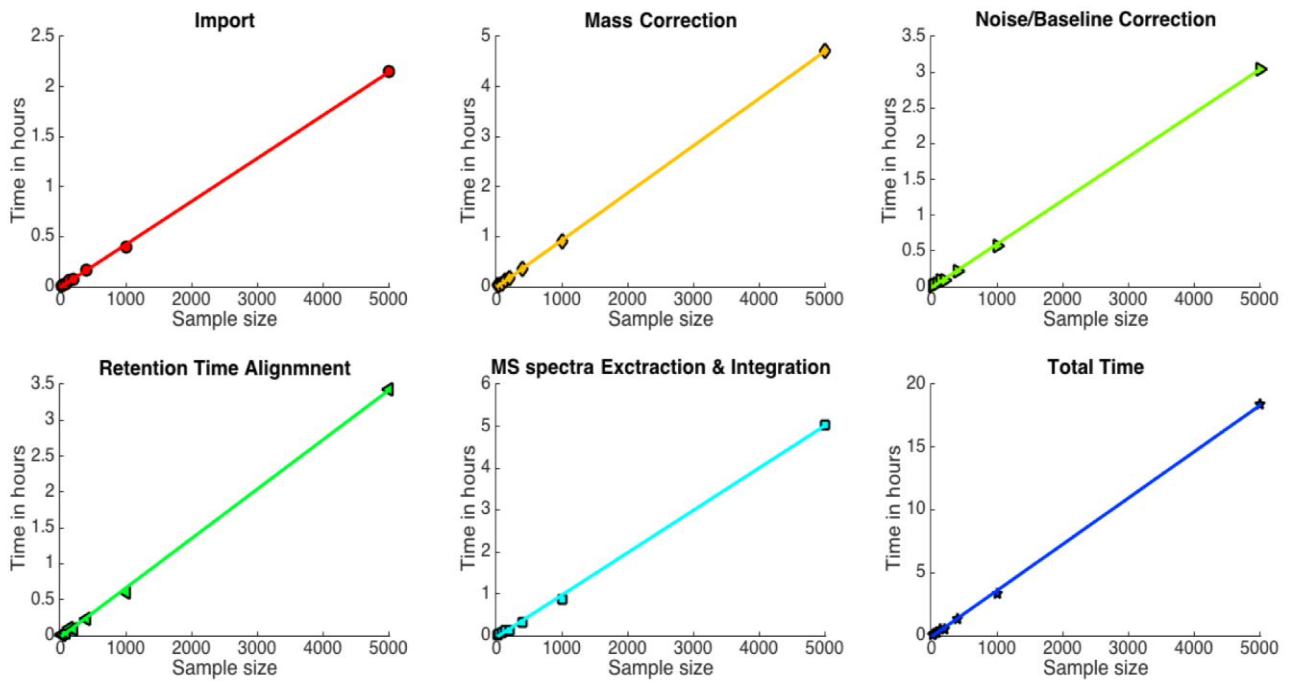

The workflow memory load is constant (*i.e.* one sample data set is processed at a time). ~200Gb of raw data for 5000 samples

**Figure S2. MSHub scalability testing on a single core desktop PC.** The dependency between the number of samples processed and the processing time for each of the MSHub modules performed on a single core desktop PC.

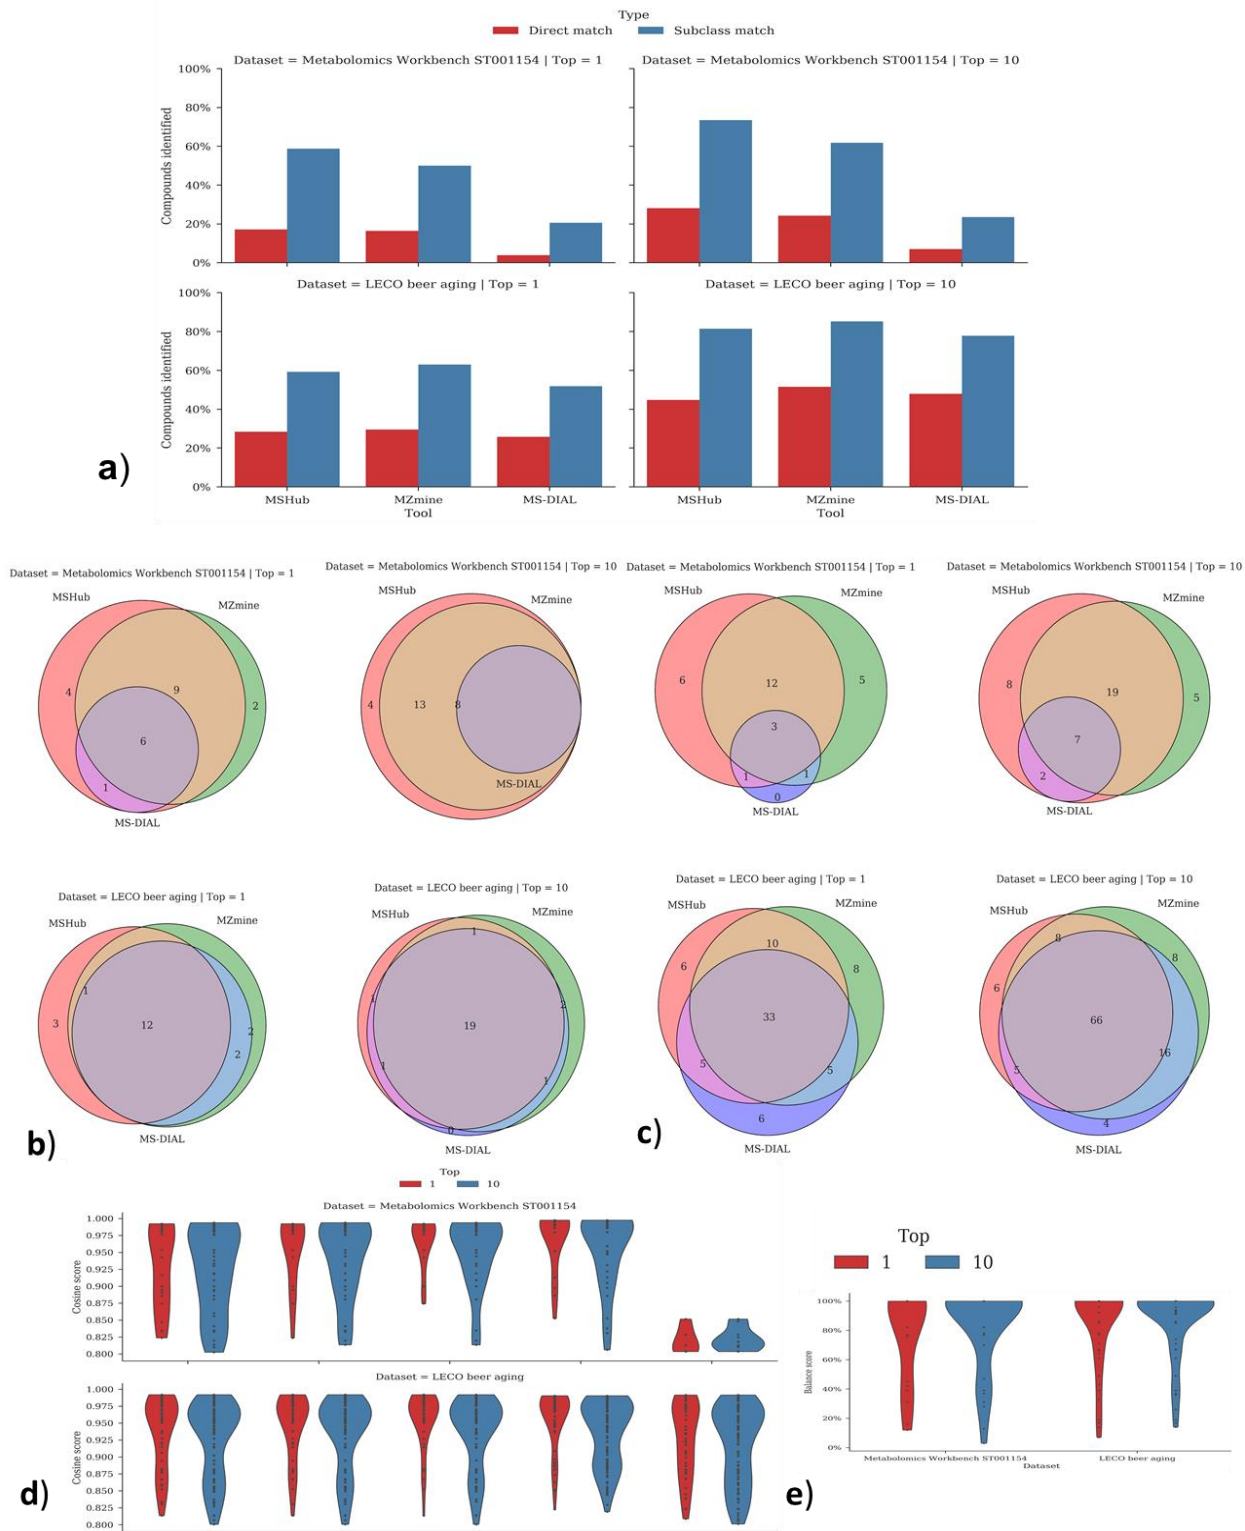

**Figure S3.** Comparison of deconvolution accuracy judged by proxy of annotation success rate (percentage of “known” compounds in the test samples that were automatically annotated) of MSHub, MZmine 2/ADAP and MS-DIAL deconvolution tools for test datasets: MSV000084039 (Metabolomics Workbench ST001154, derivatized mouse blood serum) and MSV000084349 (LECO beer aging reference data). The settings of MZmine 2/ADAP and MS-DIAL were optimized as described in the “Online Methods” by the ADAP algorithm developers; MSHub was run with automatically determined settings. For the dataset MSV000084039, the settings for MS-DIAL had to be adjusted by increasing the noise threshold tenfold to enable the processing without tool failing. The links to library search jobs are summarized in **Table S3**. **a)** Percentage of “known” (curated) compounds correctly annotated directly or by its subclass. Annotations at the chemical family level could serve as a good proxy benchmark of the ability to resolve spectral patterns, even if they are not annotated to the exact correct compound. For the MSV000084349 dataset, the sub-class level annotation in top 10 matches reaches close to 100% for MSHub and MZmine 2/ADAP, which is indicative of essentially all of the spectral patterns for the known/curated compounds being sufficiently well recovered by the deconvolution tool to be attributable to correct chemical family. **b)** Venn diagram of correctly directly annotated compounds from deconvolution by each tool. **c)** Venn diagram of correctly annotated compound classes. **d)** Violin plot of the cosine match scores for MSHub (directly and with 60% and 80% balance score filtering applied), MZmine 2/ADAP and MS-DIAL. Application of balance score filter for MSHub removes poor quality spectra **e)** Violin plot of match score values as the function of balance score for the datasets MSV000084039 (Metabolomics Workbench ST001154, derivatized mouse blood serum, **Table S6**) and MSV000084349 (LECO beer aging reference data, **Table S7**) for the “known” (curated) compounds correctly identified in the top 1 and top 10 matches.

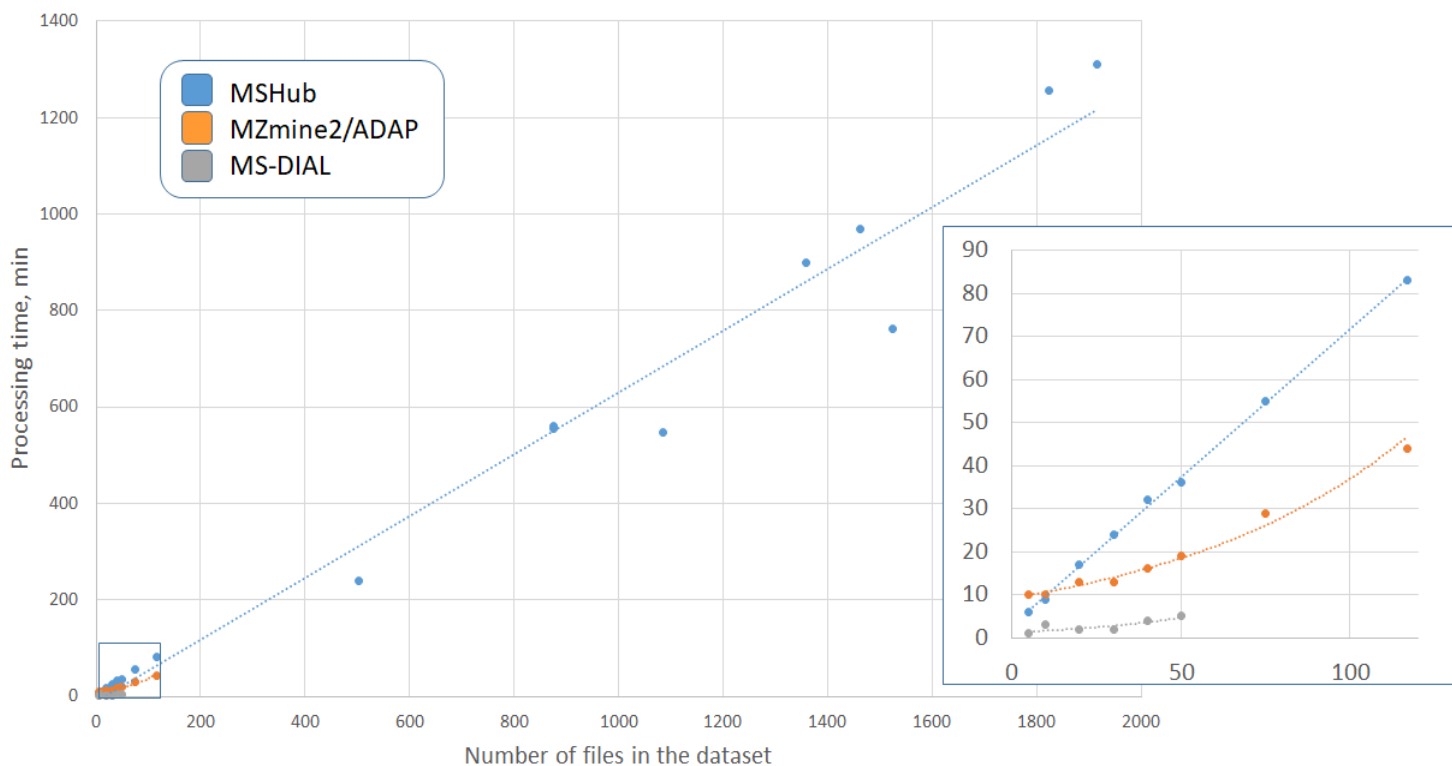

**Figure S4.** Comparison of processing times of MSHub with MZmine 2/ADAP and MS-DIAL on a 12 CPUs and 248GB RAM system of the test data (**Supplemental Table S4**). The times are plotted for successfully processed subsets; MSHub successfully processed all of the tested data (largest tested set is 1914 files), MZmine 2/ADAP fails with insufficient memory error at <530 files, MS-DIAL fails at <75 files. The inset panel shows the portion of the plot within the box, where all three tools can operate successfully; the scaling of deconvolution time with the number of files is exponential for MZmine 2/ADAP and MS-DIAL and linear for MSHub.

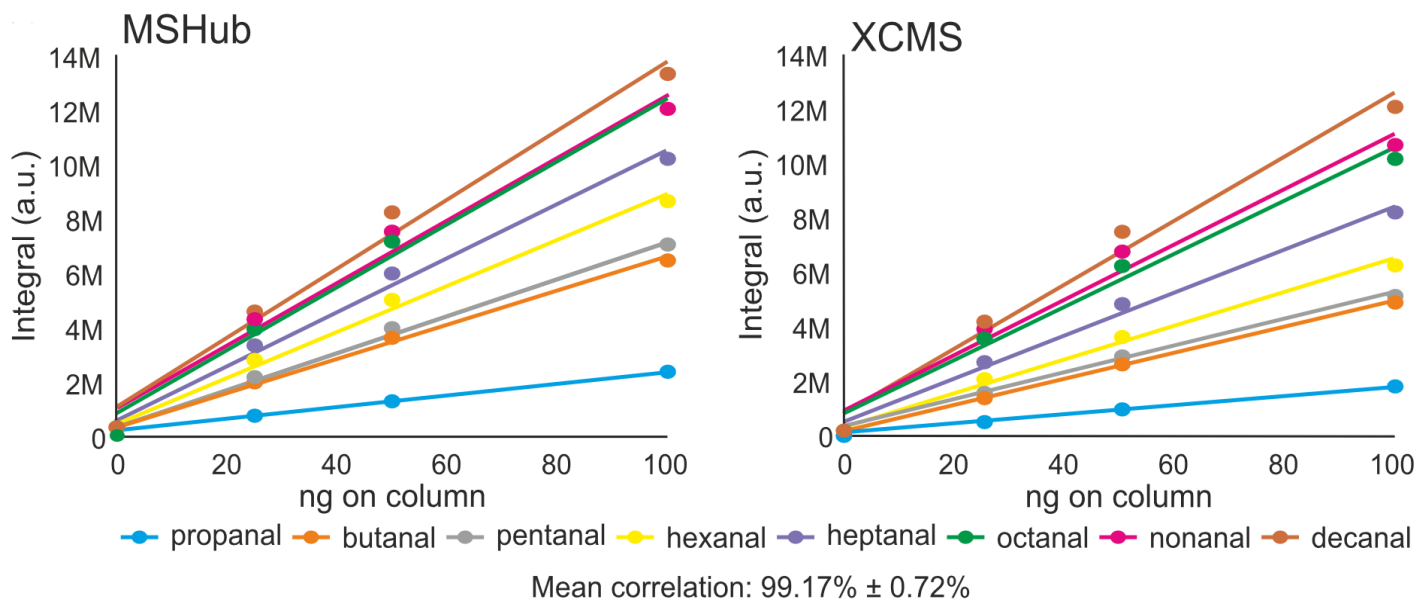

**Figure S5.** Comparison of quantitation accuracy of MSHub with XCMS of the dataset MSV000084622. The performance of both tools is nearly identical (the calibration curve is within 99.17% correlation with 0.72% STD).

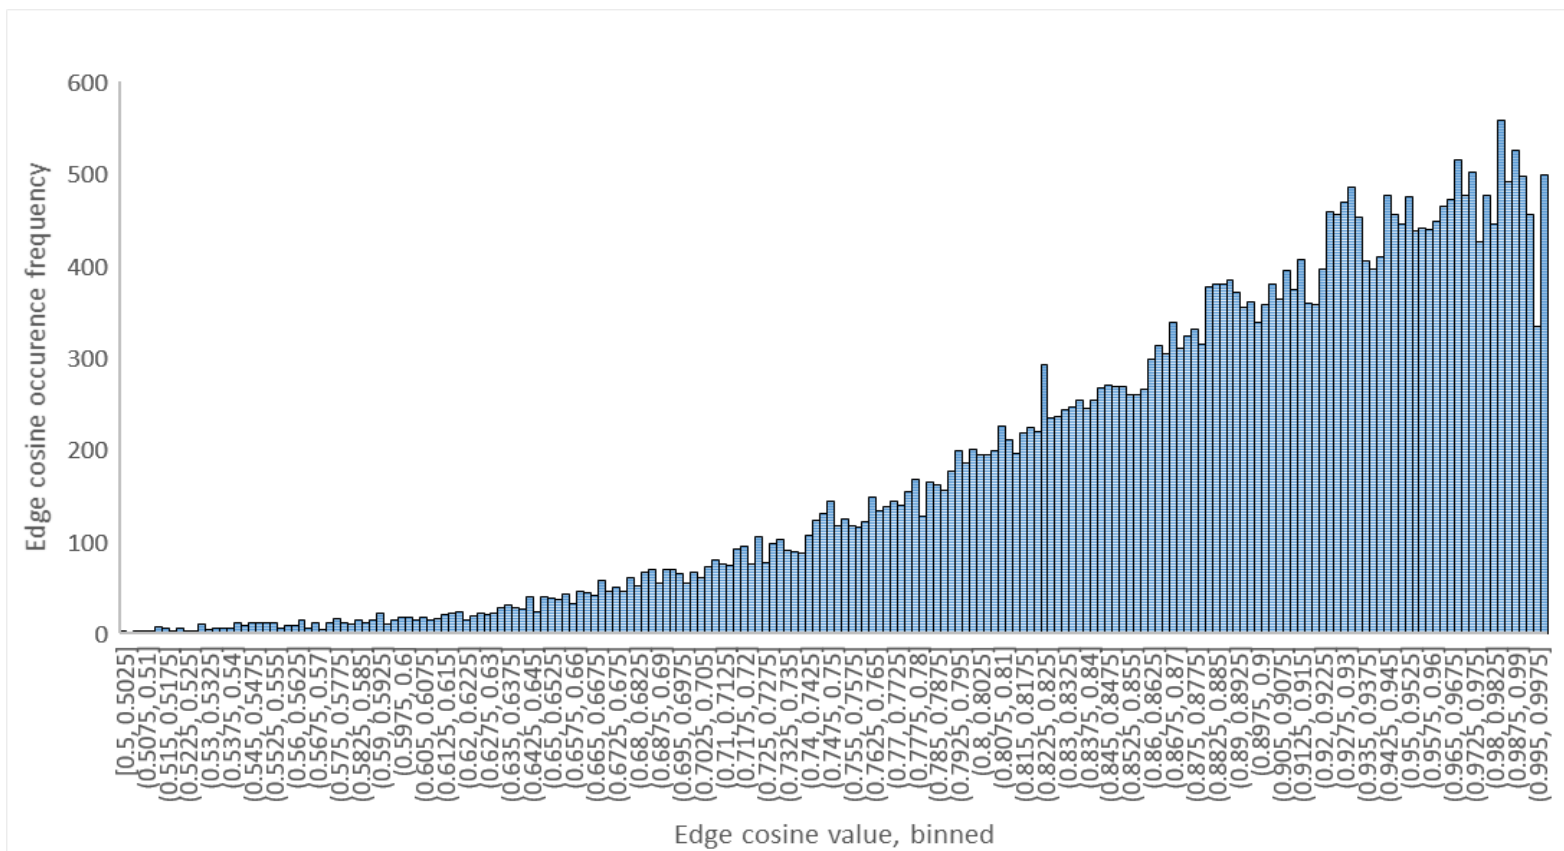

**Figure S6. Global network overview (Figure 2, the datasets across GNPS (#1-38 in Table S1)).** Distribution of the cosine for all edges in the global network.



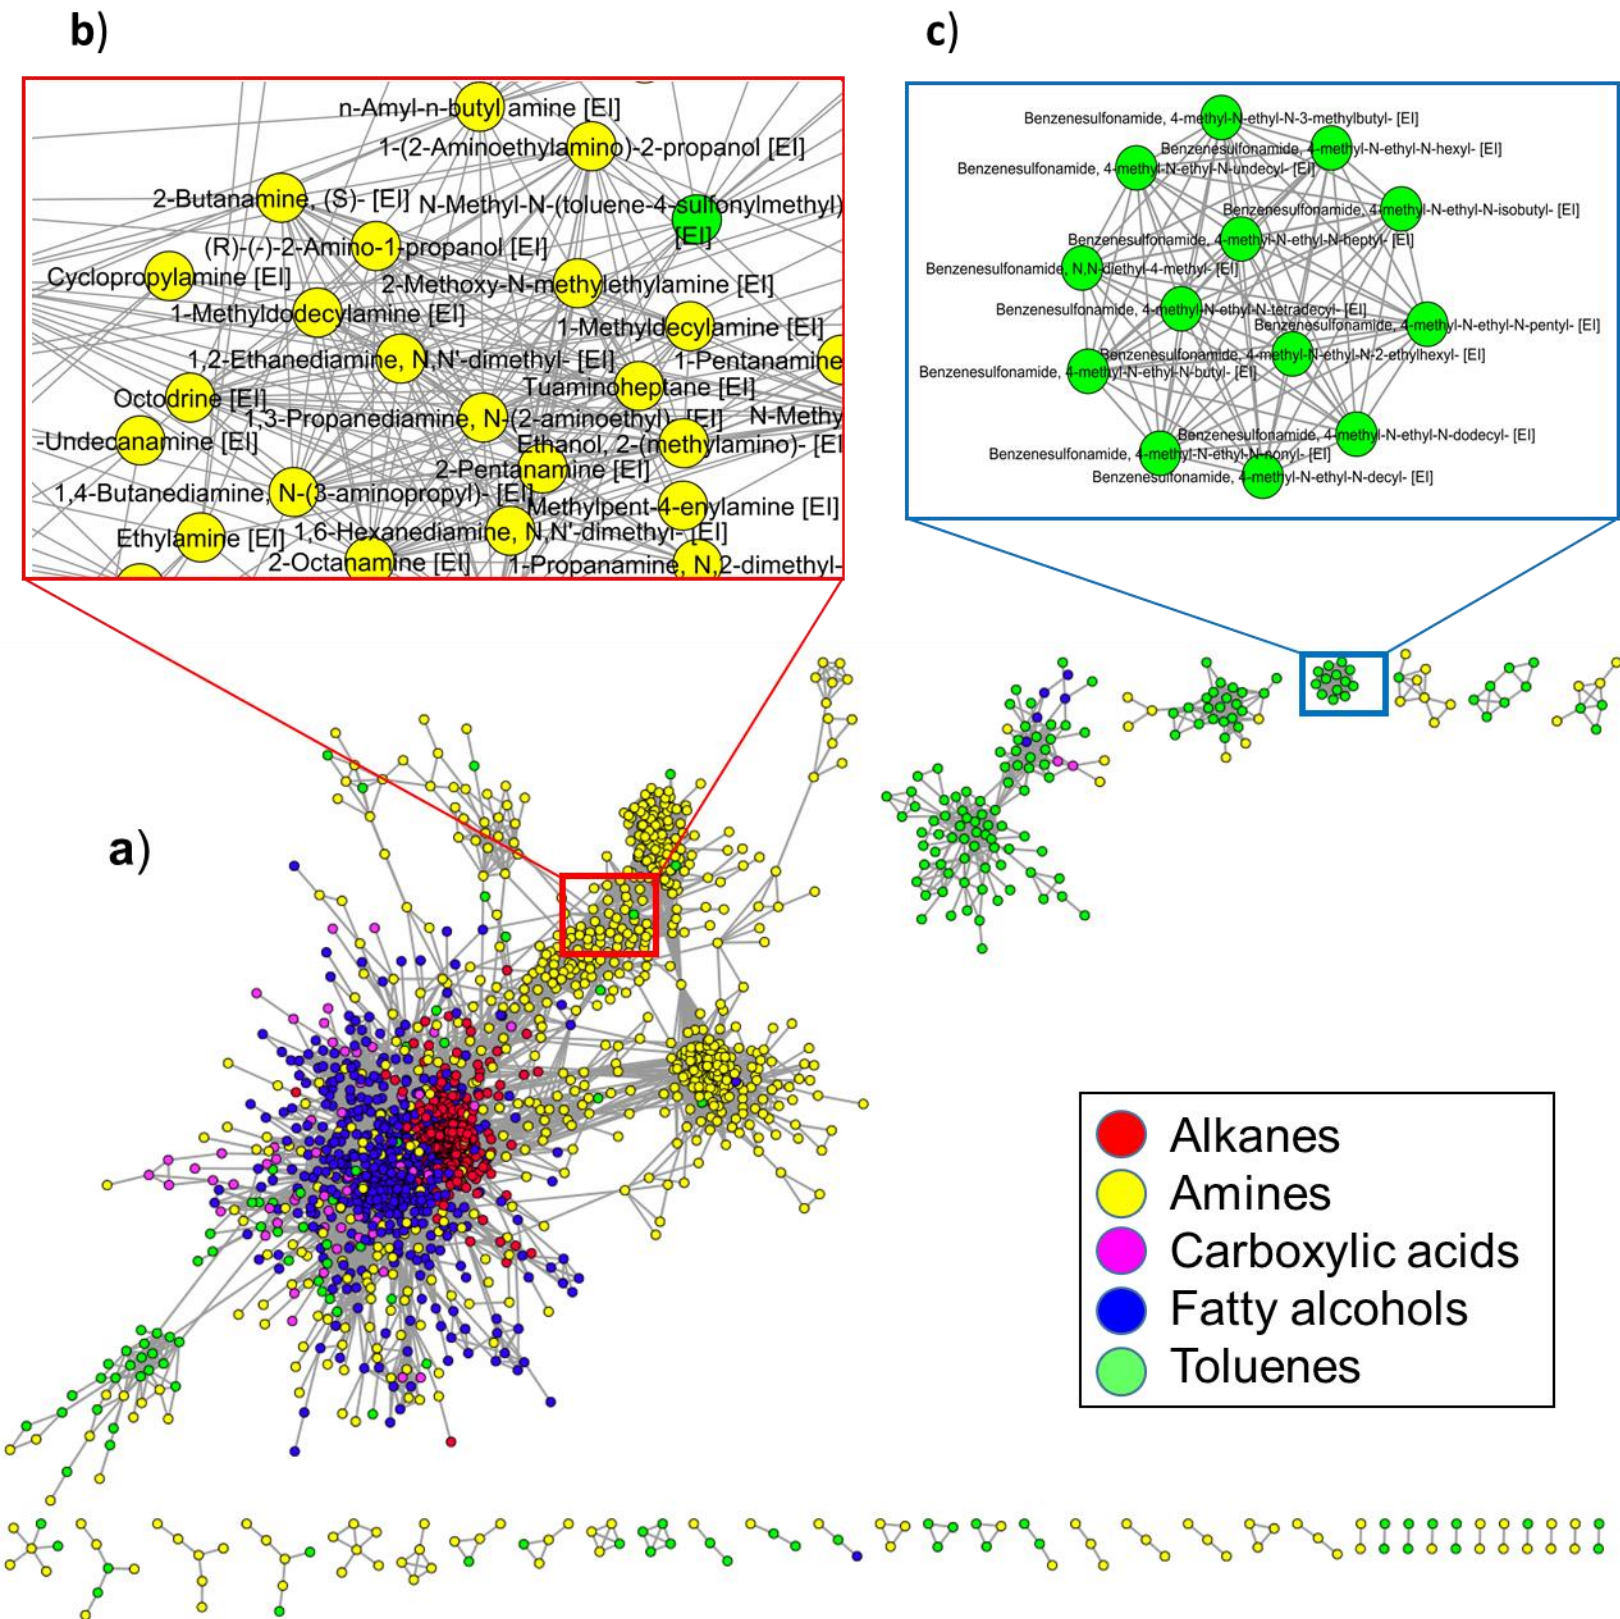

**Figure S7. The basis for the EI-based molecular networking.** Molecular network for the reference spectra of the NIST 14 reference library; only nodes with connections are displayed. All library compounds were classified using ClassyFire (*J. Cheminform.* **8**, 61, 2016). and examples of commonly encountered molecular subclasses were selected based on the following ClassyFire chemical subclass ontology terms of the top annotation for each node: alkanes, amines, carboxylic acids, fatty alcohols and toluenes. a) Network appearance at the cosine threshold of 0.85 for all of the compounds across five subclasses shows clustering largely follows chemical similarity: aliphatic compounds create a large cluster with separation by functional group, while aryls form distinct clusters. b) The part of the network within the red inset box on Figure 2a that shows portion of the amine cluster with high interconnectivity indicating broad spectral similarities of the EI spectra for these molecules. c) The part of the network within the blue inset box on Figure 2c showing the cluster of Benzenesulfonamides: all members of the clusters are interconnected, but not connected to any other nodes in the network indicating unique appearance of EI spectra of these compounds.

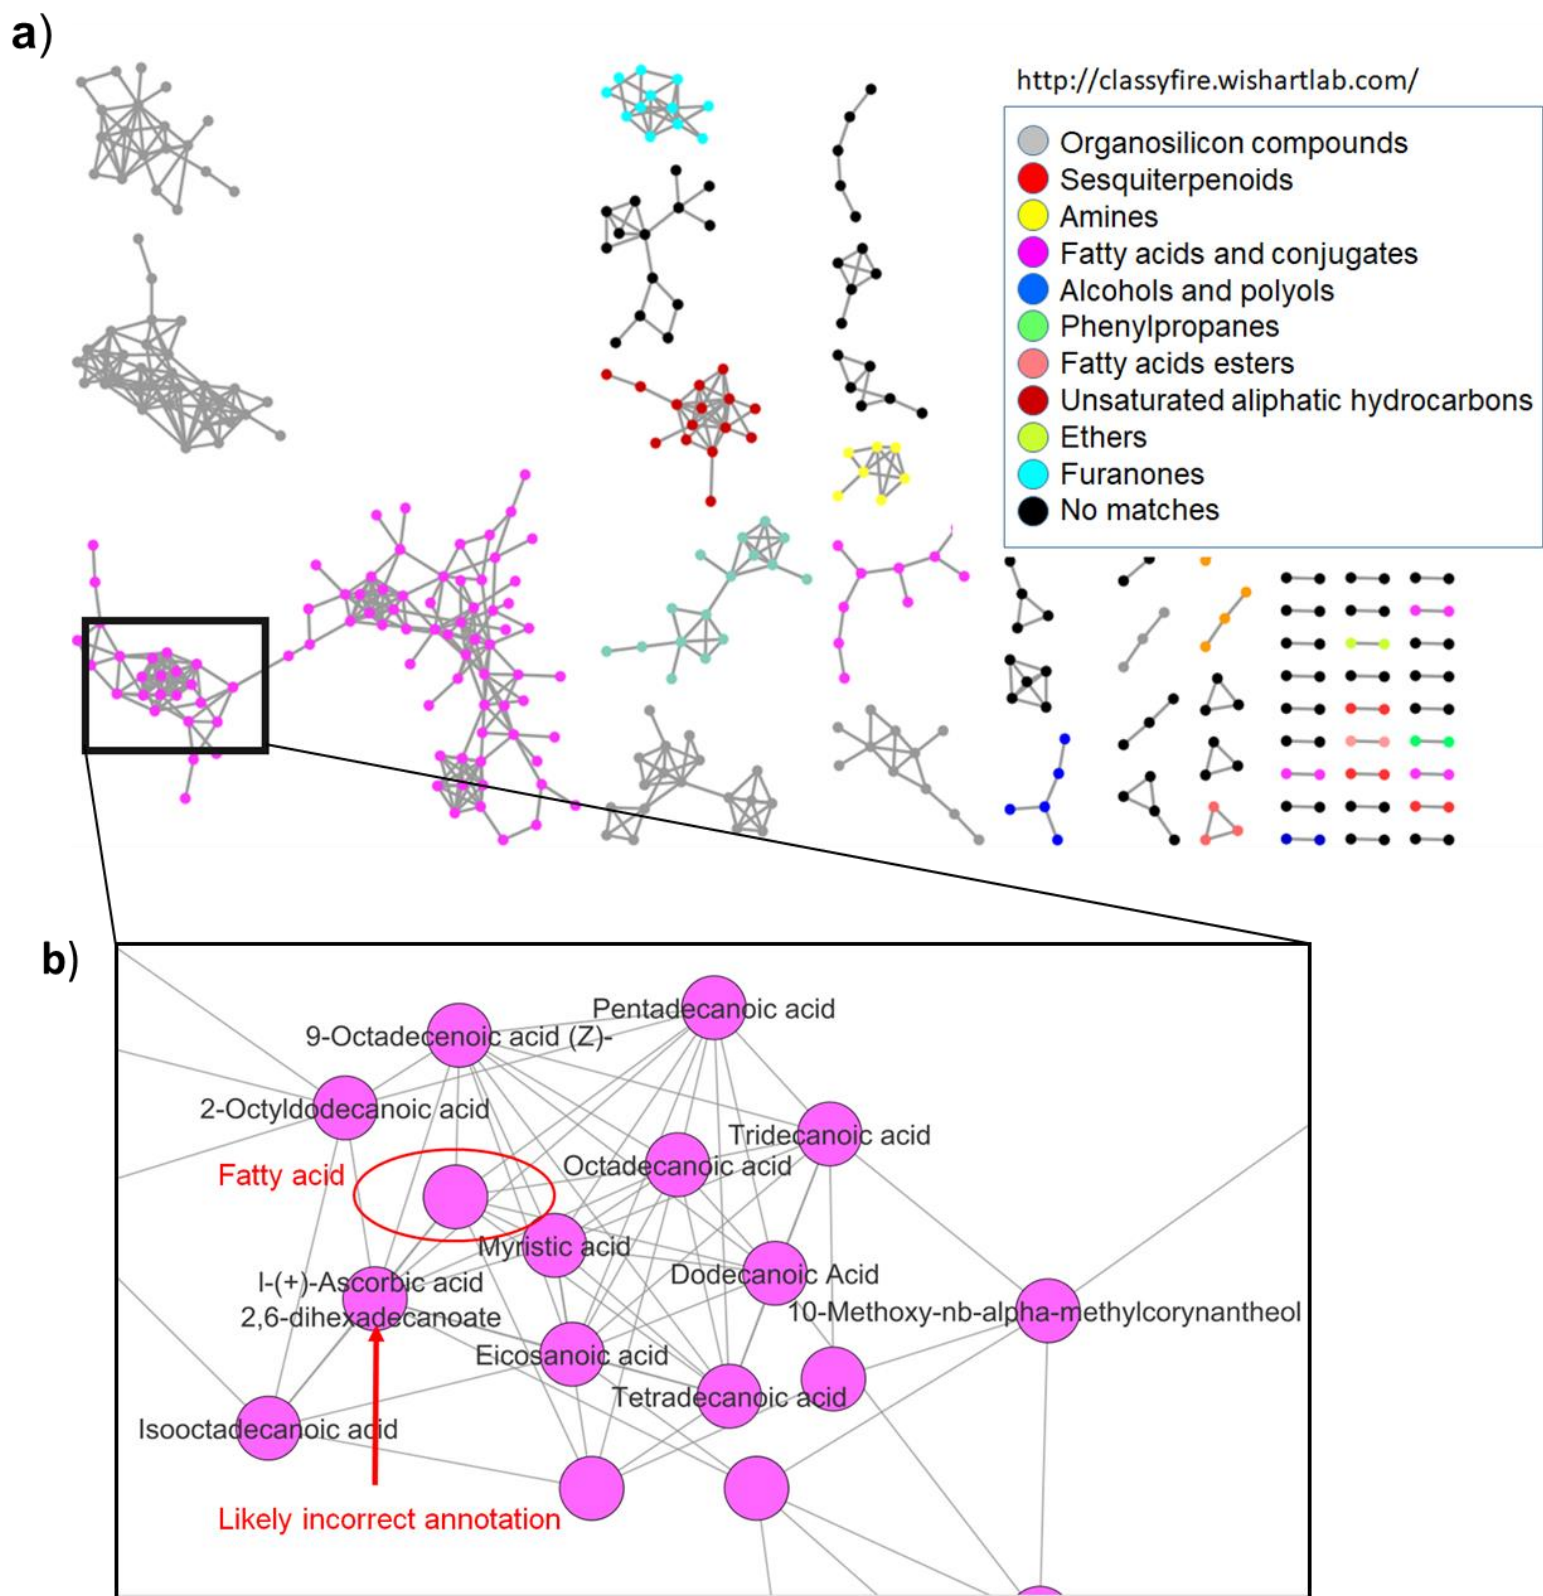

**Figure S8. Example of molecular network application for “annotation guidance”.** a) a network of skin volatiles (dataset #19 in Table S1) is shown, only connected nodes are displayed. The MolNetEnhancer (*Metabolites* 9, 2019). workflow was adapted to work with GC-MS data. As a result, nodes are colored by the chemical subclass term mostly occurring in the molecular family. For cases where no chemical structures (annotation) could be retrieved for any of the nodes within a molecular family using a cosine threshold of 0.5, the cluster is labelled as “No matches”. b) Demonstration of the molecular network annotation guidance. The portion of the network corresponding to the “fatty acids and conjugates” cluster (box on the panel (a)) is shown; the circled unannotated node is presumed to be the fatty acid according to the annotations of the nearby nodes. It was manually verified to be a fatty acid with 14 carbons or greater. Also shown is an example of a node (indicated by arrow) with an annotation (top hit) that does not fall within expected chemical subclass and is therefore suspected to be incorrect. It has been manually verified that the most likely correct annotation for this node is hexadecanoic acid which is more in line with the other surrounding annotations connected to it.



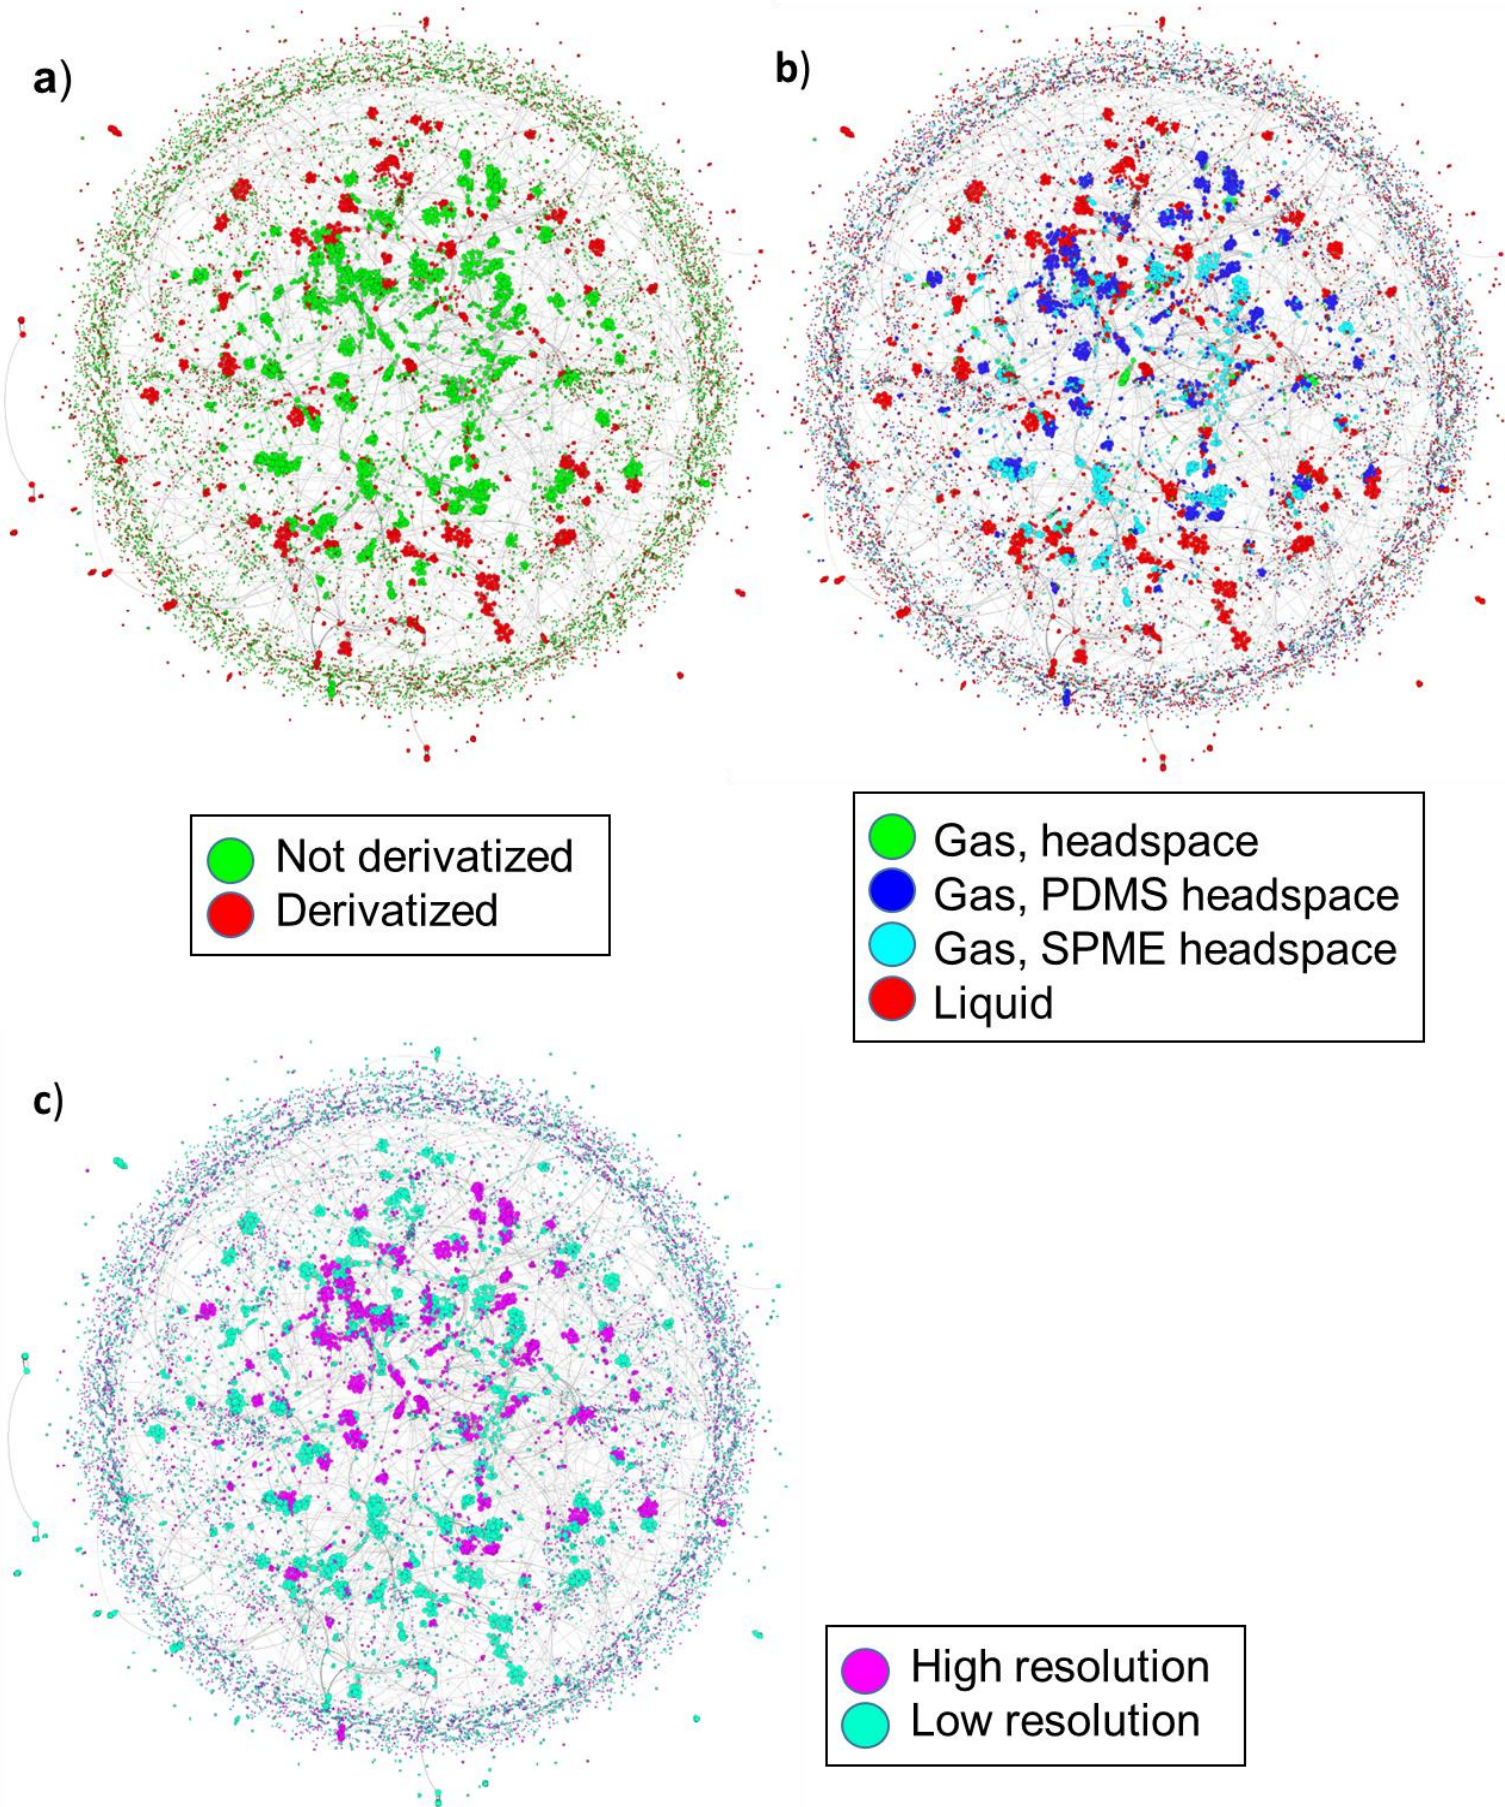

**Figure S9. Networking in GNPS at repository scale.** Global network containing 35,544 nodes from 8,489 files in 38 GNPS datasets for different types of samples. The size of the node is proportional to its connectivity (*Computer Networks and ISDN Systems* vol. 30 107–117, 1998), the edge thickness is proportional to the cosine score. Global network for the GNPS-wide data colored by a) derivatization status b) sample introduction mode c) input data resolution. In all cases distinct clustering can be observed, driven by distinct chemistries in the individual datasets.



a)

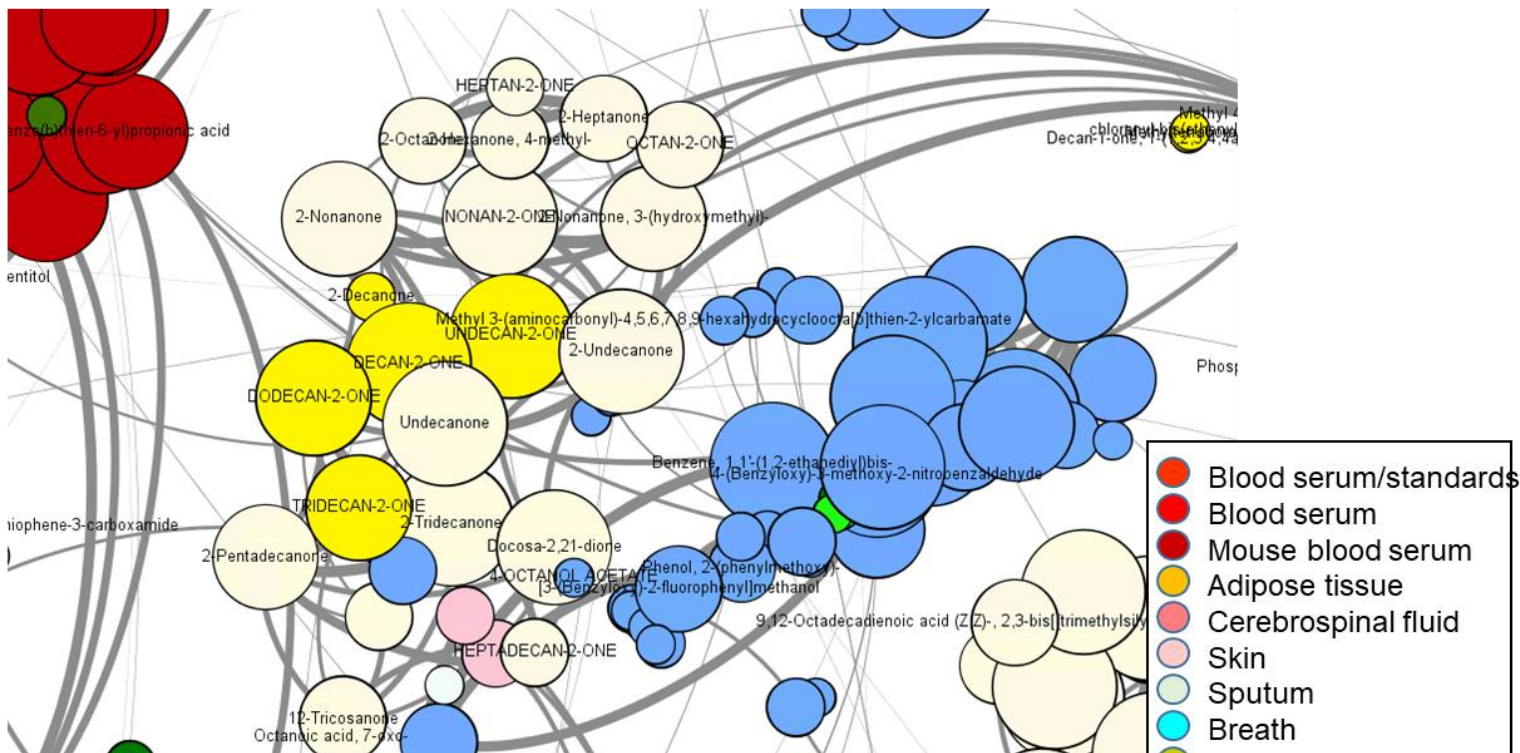

b)

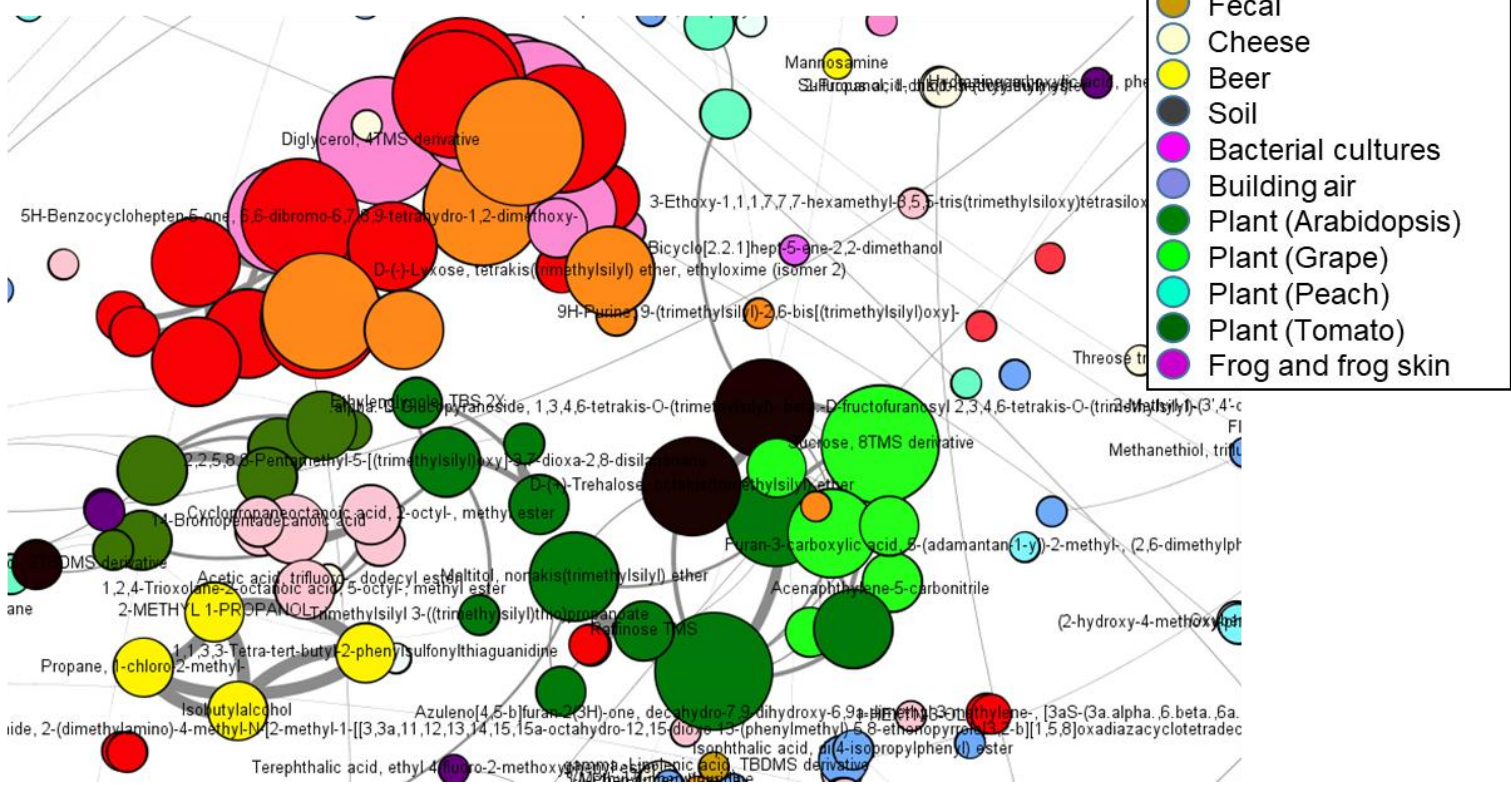

**Figure S10. Networking in GNPS at repository scale.** For the global network shown on Figure 3c colored by different types of samples. a) Close-up of a cluster of long and medium chain ketones which occur in cheese and beer and contribute to their flavors. b) Sugars are found across different types of plants and in soil.



Table S2. Comparison of deconvolution tools for GC-MS data used in metabolomics research

|                                      | Platform and interface                                                                                 | Spectrum generation                                     | Settings                                                                     | Scalability                                                                 | Reproducibility                                                                                                            | Accessibility                                                                           | Reference                                                                                                                                                                                                                                                                                                                                                                                               |
|--------------------------------------|--------------------------------------------------------------------------------------------------------|---------------------------------------------------------|------------------------------------------------------------------------------|-----------------------------------------------------------------------------|----------------------------------------------------------------------------------------------------------------------------|-----------------------------------------------------------------------------------------|---------------------------------------------------------------------------------------------------------------------------------------------------------------------------------------------------------------------------------------------------------------------------------------------------------------------------------------------------------------------------------------------------------|
| <b>MSHub (introduced 2019)</b>       | Cross-platform (python). Command line (API) interface. Web-based interface available as GNPS workflow. | Spectral decomposition                                  | None (automatically determined).                                             | Limit is currently unknown, >10,000 files tested.                           | Analysis settings and processing steps automatically stored in the HDF5 file.                                              | Easily accessible to users with any level of expertise if used as the GNPS workflow.    | The present manuscript                                                                                                                                                                                                                                                                                                                                                                                  |
| <b>MS-DIAL (introduced 2015)</b>     | Windows (.NET). Graphical user interface and can be partially automated.                               | Spectral deconvolution using chromatogram decomposition | Manual (<20 settable parameters).                                            | Limited by the RAM memory consumption (typically <100 files).               | Settings can be entered manually or can be imported from a method. Parameters are automatically saved into an output file. | Easily accessible, but requires expertise for parameters selection.                     | <a href="https://www.nature.com/articles/nmeth.3393">https://www.nature.com/articles/nmeth.3393</a>                                                                                                                                                                                                                                                                                                     |
| <b>MZmine/ADAP (introduced 2010)</b> | Cross-platform (Java). Graphical user interface and can be partially automated.                        | Spectral deconvolution using chromatogram decomposition | Manual (>30 settable parameters).                                            | Limited by the RAM memory consumption (typically few hundreds of files).    | Settings can be entered manually or imported from a batch file.                                                            | Easily accessible, but requires expertise for parameters selection.                     | <a href="https://pubs.acs.org/doi/abs/10.1021/acs.jproteome.7b00633">https://pubs.acs.org/doi/abs/10.1021/acs.jproteome.7b00633</a> <a href="https://pubs.acs.org/doi/abs/10.1021/acs.analchem.6b02222">https://pubs.acs.org/doi/abs/10.1021/acs.analchem.6b02222</a> <a href="https://pubs.acs.org/doi/abs/10.1021/acs.analchem.9b01424">https://pubs.acs.org/doi/abs/10.1021/acs.analchem.9b01424</a> |
| <b>XCMS (introduced 2005)</b>        | Cross-platform (R) and text-based interface.                                                           | Peak grouping                                           | Manual or semi-automated with the IPO package (>30 settable parameters).     | Scalability unknown, but can process several hundred of files on a cluster. | Commandline tool. Settings can be entered manually, or imported from script.                                               | Accessible for bioinformaticians, but requires training for other users.                | <a href="https://pubs.acs.org/doi/abs/10.1021/ac051437y">https://pubs.acs.org/doi/abs/10.1021/ac051437y</a>                                                                                                                                                                                                                                                                                             |
| <b>XCMS online (introduced 2012)</b> | Web-based interface.                                                                                   | Peak grouping                                           | Automatically provided for instrument types and can be modified by the user. | Scalability unknown, but can process several hundred of files.              | Settings are saved automatically.                                                                                          | Easily accessible to users with moderate level of expertise at the XCMS online website. | <a href="https://pubs.acs.org/doi/abs/10.1021/ac300698c">https://pubs.acs.org/doi/abs/10.1021/ac300698c</a>                                                                                                                                                                                                                                                                                             |
| <b>AMDIS (introduced 1998)</b>       | Windows. Graphical user interface, cannot be automated.                                                | Spectral deconvolution using chromatogram decomposition | Manual (~10 settable parameters).                                            | One file at a time.                                                         | Settings need to be entered manually each time.                                                                            | Easily accessible, but requires expertise for parameters selection.                     | <a href="https://doi.org/10.1002/(SICI)1097-0231(19990228)13:4&lt;279::AID-RCM478&gt;3.0.CO;2-I">https://doi.org/10.1002/(SICI)1097-0231(19990228)13:4&lt;279::AID-RCM478&gt;3.0.CO;2-I</a>                                                                                                                                                                                                             |



| Table S3. Testing of deconvolution accuracy of MSHub and existing deconvolution tools |                                                                                                                                                                                   |                                                                                                                                                                                   |
|---------------------------------------------------------------------------------------|-----------------------------------------------------------------------------------------------------------------------------------------------------------------------------------|-----------------------------------------------------------------------------------------------------------------------------------------------------------------------------------|
| <b>Dataset description</b>                                                            | Metabolomics Workbench_ST001154                                                                                                                                                   | LECO beer aging reference data                                                                                                                                                    |
| <b>MassIVE ID</b>                                                                     | MSV000084039                                                                                                                                                                      | MSV000084349                                                                                                                                                                      |
| <b>ftp link</b>                                                                       | <a href="ftp://massive.ucsd.edu/MSV000084039/">ftp://massive.ucsd.edu/MSV000084039/</a>                                                                                           | <a href="ftp://massive.ucsd.edu/MSV000084349/">ftp://massive.ucsd.edu/MSV000084349/</a>                                                                                           |
| <b>Reference</b>                                                                      | <a href="https://www.ncbi.nlm.nih.gov/pmc/articles/PMC6571919/">https://www.ncbi.nlm.nih.gov/pmc/articles/PMC6571919/</a>                                                         | NA                                                                                                                                                                                |
| <b>Sample introduction mode</b>                                                       | Liquid                                                                                                                                                                            | Gas, SPME                                                                                                                                                                         |
| <b>Derivatized?</b>                                                                   | Yes                                                                                                                                                                               | No                                                                                                                                                                                |
| <b>Uberon/sample type</b>                                                             | Mouse blood serum                                                                                                                                                                 | Beer                                                                                                                                                                              |
| <b>Instrument</b>                                                                     | ToF                                                                                                                                                                               | ToF                                                                                                                                                                               |
| <b>Data type</b>                                                                      | Low res                                                                                                                                                                           | Low res                                                                                                                                                                           |
| <b>Data file format</b>                                                               | cdf                                                                                                                                                                               | cdf                                                                                                                                                                               |
| <b>Number of files</b>                                                                |                                                                                                                                                                                   | 300 42                                                                                                                                                                            |
| <b>GNPS deconvolution link for MSHub</b>                                              | <a href="https://gnps.ucsd.edu/ProteoSAFe/status.jsp?task=9f305f5b6db94e71a5775c77b124d8f7">https://gnps.ucsd.edu/ProteoSAFe/status.jsp?task=9f305f5b6db94e71a5775c77b124d8f7</a> | <a href="https://gnps.ucsd.edu/ProteoSAFe/status.jsp?task=f1ee1e1d480448b197a08d804414ddf6">https://gnps.ucsd.edu/ProteoSAFe/status.jsp?task=f1ee1e1d480448b197a08d804414ddf6</a> |
| <b>GNPS library search link, MSHub deconvolution</b>                                  | <a href="https://gnps.ucsd.edu/ProteoSAFe/status.jsp?task=4f2de61ac9b949ddb1dd68b0d2fcd76f">https://gnps.ucsd.edu/ProteoSAFe/status.jsp?task=4f2de61ac9b949ddb1dd68b0d2fcd76f</a> | <a href="https://gnps.ucsd.edu/ProteoSAFe/status.jsp?task=3544543809e04e30b7848432182d0dc3">https://gnps.ucsd.edu/ProteoSAFe/status.jsp?task=3544543809e04e30b7848432182d0dc3</a> |
| <b>GNPS library search link, MZmine2/ADAP deconvolution</b>                           | <a href="https://gnps.ucsd.edu/ProteoSAFe/status.jsp?task=021f48182d4c4f9aaa759bd40c5ea14d">https://gnps.ucsd.edu/ProteoSAFe/status.jsp?task=021f48182d4c4f9aaa759bd40c5ea14d</a> | <a href="https://gnps.ucsd.edu/ProteoSAFe/status.jsp?task=37971f05c990478596a463a94d201361">https://gnps.ucsd.edu/ProteoSAFe/status.jsp?task=37971f05c990478596a463a94d201361</a> |
| <b>GNPS library search link, MS-DIAL deconvolution</b>                                | <a href="https://gnps.ucsd.edu/ProteoSAFe/status.jsp?task=16d202bd23784024ba85b381ab9aa16d">https://gnps.ucsd.edu/ProteoSAFe/status.jsp?task=16d202bd23784024ba85b381ab9aa16d</a> | <a href="https://gnps.ucsd.edu/ProteoSAFe/status.jsp?task=dd21a47e2089475ab48a71a5bf163f3e">https://gnps.ucsd.edu/ProteoSAFe/status.jsp?task=dd21a47e2089475ab48a71a5bf163f3e</a> |
| <b>GNPS library search link, MSHub deconvolution (public library)</b>                 | <a href="https://gnps.ucsd.edu/ProteoSAFe/status.jsp?task=116e7bfc25074900a3da3a1817b9e9f9">https://gnps.ucsd.edu/ProteoSAFe/status.jsp?task=116e7bfc25074900a3da3a1817b9e9f9</a> | <a href="https://gnps.ucsd.edu/ProteoSAFe/status.jsp?task=e9c642b2ae224862b4d7875cefd20a6">https://gnps.ucsd.edu/ProteoSAFe/status.jsp?task=e9c642b2ae224862b4d7875cefd20a6</a>   |
| <b>GNPS library search link, MSHub deconvolution (NIST and Wiley)</b>                 | <a href="https://gnps.ucsd.edu/ProteoSAFe/status.jsp?task=a693ad96f9b24b39967e7bfd519ebe3f">https://gnps.ucsd.edu/ProteoSAFe/status.jsp?task=a693ad96f9b24b39967e7bfd519ebe3f</a> | <a href="https://gnps.ucsd.edu/ProteoSAFe/status.jsp?task=69d756fa78054e169da184cca90efd0e">https://gnps.ucsd.edu/ProteoSAFe/status.jsp?task=69d756fa78054e169da184cca90efd0e</a> |



| Table S5. Spiked compounds in the dataset MSV000083658 |                                                 |                              |                   |
|--------------------------------------------------------|-------------------------------------------------|------------------------------|-------------------|
| compound name                                          | SMILES                                          | InChIKey                     | subclass          |
| cis-13,16-Docosadienoic acid methyl ester              | <chem>CCCCC=CCC=CCCCCCCCCCCC(=O)OC</chem>       | UPIRHFZFPVEDCF-UHFFFAOYSA-N  | CHEMONTID:0000324 |
| cis-4,7,10,13,16,19-Docosahexaenoic acid methyl ester  | <chem>CCC=CCC=CCC=CCC=CCC=CCC=CCCC(=O)OC</chem> | VCDLWFYODNTQOT-UHFFFAOYSA-N  | CHEMONTID:0000324 |
| cis-11,14-Eicosadienoic acid methyl ester              | <chem>CCCCCC=CCC=CCCCCCCCCCCC(=O)OC</chem>      | GWJCFQAOQCNNFAM-UHFFFAOYSA-N | CHEMONTID:0000324 |
| cis-5,8,11,14,17-Eicosapentaenoic acid methyl ester    | <chem>CCC=CCC=CCC=CCC=CCC=CCCCC(=O)OC</chem>    | QWDCYFDDFPWISL-UHFFFAOYSA-N  | CHEMONTID:0000324 |
| cis-8,11,14-Eicosatrienoic acid methyl ester           | <chem>CCCCCC=CCC=CCC=CCCCCCCC(=O)OC</chem>      | QHATYOWJCAQINT-UHFFFAOYSA-N  | CHEMONTID:0000324 |
| cis-11,14,17-Eicosatrienoic acid methyl ester          | <chem>CCC=CCC=CCC=CCCCCCCCCCCC(=O)OC</chem>     | XQAVRBUXEPJVRC-UHFFFAOYSA-N  | CHEMONTID:0000324 |
| cis-11-Eicosenoic acid methyl ester                    | <chem>CCCCCCCCC=CCCCCCCCCCCC(=O)OC</chem>       | RBKMRGOHCLRTLZ-UHFFFAOYSA-N  | CHEMONTID:0000324 |
| Methyl cis-10-heptadecenoate                           | <chem>CCCCCCC=CCCCCCCCCCCC(=O)OC</chem>         | JNSUZRHLDQGP-N-UHFFFAOYSA-N  | CHEMONTID:0000324 |
| Methyl hexanoate                                       | <chem>CCCCCC(=O)OC</chem>                       | NUKZAGXMHTUAFE-UHFFFAOYSA-N  | CHEMONTID:0000324 |
| Methyl $\alpha$ -linolenate                            | <chem>CCC=CCC=CCC=CCCCCCCC(=O)OC</chem>         | DVWSXZIHUSUZZKJ-UHFFFAOYSA-N | CHEMONTID:0000504 |
| Methyl arachidate                                      | <chem>CCCCCCCCCCCCCCCCCCCC(=O)OC</chem>         | QGBRLVONZXHAKJ-UHFFFAOYSA-N  | CHEMONTID:0000324 |
| Methyl arachidonate                                    | <chem>CCCCC=CCC=CCC=CCC=CCCCC(=O)OC</chem>      | OFIDNKMQBVGNIW-UHFFFAOYSA-N  | CHEMONTID:0000324 |
| Methyl behenate                                        | <chem>CCCCCCCCCCCCCCCCCCCC(=O)OC</chem>         | QSQLTHHMFHEFIY-UHFFFAOYSA-N  | CHEMONTID:0000324 |
| Methyl butyrate                                        | <chem>CCCC(=O)OC</chem>                         | UIIQMZJEGPQKFD-UHFFFAOYSA-N  | CHEMONTID:0000324 |
| Methyl decanoate                                       | <chem>CCCCCCCCCCC(=O)OC</chem>                  | YRHYCMZPEVDGFQ-UHFFFAOYSA-N  | CHEMONTID:0000324 |
| Methyl dodecanoate                                     | <chem>CCCCCCCCCCCCC(=O)OC</chem>                | UQDUPQYQJKYHQI-UHFFFAOYSA-N  | CHEMONTID:0000324 |
| Methyl elaidate                                        | <chem>CCCCCCCCC=CCCCCCCC(=O)OC</chem>           | QYDYPVFESGNLHU-UHFFFAOYSA-N  | CHEMONTID:0000324 |
| Methyl erucate                                         | <chem>CCCCCCCCC=CCCCCCCCCCCC(=O)OC</chem>       | ZYNDJIBBPLNPOW-UHFFFAOYSA-N  | CHEMONTID:0000324 |
| Methyl heneicosanoate                                  | <chem>CCCCCCCCCCCCCCCCCCCC(=O)OC</chem>         | AJRICDSAQJHSD-UHFFFAOYSA-N   | CHEMONTID:0000324 |
| Methyl heptadecanoate                                  | <chem>CCCCCCCCCCCCCCCCC(=O)OC</chem>            | HUEBIMLTDXKIPR-UHFFFAOYSA-N  | CHEMONTID:0000324 |
| Methyl linoleate                                       | <chem>CCCCC=CCC=CCCCCCCC(=O)OC</chem>           | WTTJVINHCBCLGX-UHFFFAOYSA-N  | CHEMONTID:0000504 |
| Methyl linolelaidate                                   | <chem>CCCCC=CCC=CCCCCCCC(=O)OC</chem>           | WTTJVINHCBCLGX-UHFFFAOYSA-N  | CHEMONTID:0000504 |
| Methyl linolenate                                      | <chem>CCC=CCC=CCC=CCCCCCCC(=O)OC</chem>         | DVWSXZIHUSUZZKJ-UHFFFAOYSA-N | CHEMONTID:0000504 |
| Methyl myristate                                       | <chem>CCCCCCCCCCCCC(=O)OC</chem>                | ZAZKJZBWRNNLDS-UHFFFAOYSA-N  | CHEMONTID:0000324 |
| Methyl myristoleate                                    | <chem>CCCCC=CCCCCCCC(=O)OC</chem>               | RWIPJUSVXDVPB-UHFFFAOYSA-N   | CHEMONTID:0000324 |
| Methyl oleate                                          | <chem>CCCCCCCCC=CCCCCCCC(=O)OC</chem>           | QYDYPVFESGNLHU-UHFFFAOYSA-N  | CHEMONTID:0000324 |
| Methyl octanoate                                       | <chem>CCCCCCCC(=O)OC</chem>                     | JGHZJRVDZXSNNKQ-UHFFFAOYSA-N | CHEMONTID:0000324 |
| Methyl palmitate                                       | <chem>CCCCCCCCCCCCCCCC(=O)OC</chem>             | FLIACVVOZYBSBS-UHFFFAOYSA-N  | CHEMONTID:0000324 |
| Methyl palmitoleate                                    | <chem>CCCCCCC=CCCCCCCC(=O)OC</chem>             | IZFGRAGOVZCUFB-UHFFFAOYSA-N  | CHEMONTID:0000324 |
| Methyl pentadecanoate                                  | <chem>CCCCCCCCCCCCCCCC(=O)OC</chem>             | XIUXKAZJFLLDQ-UHFFFAOYSA-N   | CHEMONTID:0000324 |
| Methyl cis-10-pentadecenoate                           | <chem>CCCCC=CCCCCCCCCCCC(=O)OC</chem>           | JEDIPLFNJDRCFD-UHFFFAOYSA-N  | CHEMONTID:0000324 |
| Methyl stearate                                        | <chem>CCCCCCCCCCCCCCCCCCCC(=O)OC</chem>         | HPEUJPJOZXNMSJ-UHFFFAOYSA-N  | CHEMONTID:0000324 |
| Methyl tricosanoate                                    | <chem>CCCCCCCCCCCCCCCCCCCC(=O)OC</chem>         | VORKGRIRMPBCCZ-UHFFFAOYSA-N  | CHEMONTID:0000324 |
| Methyl tetracosanoate                                  | <chem>CCCCCCCCCCCCCCCCCCCC(=O)OC</chem>         | XUDJZDNUVZHSKZ-UHFFFAOYSA-N  | CHEMONTID:0000324 |
| Methyl tridecanoate                                    | <chem>CCCCCCCCCCCCC(=O)OC</chem>                | JNDDBOKWCBQSM-UHFFFAOYSA-N   | CHEMONTID:0000324 |

|                              |                                  |                             |                   |
|------------------------------|----------------------------------|-----------------------------|-------------------|
| Methyl undecanoate           | CCCCCCCCCCCC(=O)OC               | XPQPWPZFBULGKT-UHFFFAOYSA-N | CHEMONTID:0000324 |
| Methyl cis-15-tetracosenoate | CCCCCCCCC=CCCCCCCCCCCCCCCC(=O)OC | AINIZSBLAFHZCP-UHFFFAOYSA-N | CHEMONTID:0000324 |
| n-Octane                     | CCCCCCCC                         | TVMXDCGIABBOFY-UHFFFAOYSA-N | CHEMONTID:0002500 |
| n-Decane                     | CCCCCCCC                         | DIOQZVSQGTUSAI-UHFFFAOYSA-N | CHEMONTID:0002500 |
| n-Dodecane                   | CCCCCCCCCCCC                     | SNRUBQQJIBEYMU-UHFFFAOYSA-N | CHEMONTID:0002500 |
| n-Tetradecane                | CCCCCCCCCCCCCCCC                 | BGHCVCJVXZWKCC-UHFFFAOYSA-N | CHEMONTID:0002500 |
| n-Hexadecane                 | CCCCCCCCCCCCCCCC                 | DCAYPVUWAIABOU-UHFFFAOYSA-N | CHEMONTID:0002500 |
| n-Octadecane                 | CCCCCCCCCCCCCCCC                 | RZJRJXONCZWCBN-UHFFFAOYSA-N | CHEMONTID:0002500 |
| n-Eicosane                   | CCCCCCCCCCCCCCCCCCCC             | CBFCDTFDPHCNY-UHFFFAOYSA-N  | CHEMONTID:0002500 |
| n-Docosane                   | CCCCCCCCCCCCCCCCCCCC             | HOWGUJZVBDQJKV-UHFFFAOYSA-N | CHEMONTID:0002500 |
| n-Tetracosane                | CCCCCCCCCCCCCCCCCCCC             | POOSGDOYLQNASK-UHFFFAOYSA-N | CHEMONTID:0002500 |
| n-Hexacosane                 | CCCCCCCCCCCCCCCCCCCC             | HMSWAIKSFDFLKN-UHFFFAOYSA-N | CHEMONTID:0002500 |
| n-Octacosane                 | CCCCCCCCCCCCCCCCCCCC             | ZYURHZPYMFLWSH-UHFFFAOYSA-N | CHEMONTID:0002500 |
| n-Triacontane                | CCCCCCCCCCCCCCCCCCCC             | JXTPJDDICSTXJX-UHFFFAOYSA-N | CHEMONTID:0002500 |
| n-Dotriacontane              | CCCCCCCCCCCCCCCCCCCC             | QHMGJGNTMQDRQA-UHFFFAOYSA-N | CHEMONTID:0002500 |
| n-Tetratriacontane           | CCCCCCCCCCCCCCCCCCCC             | GWVDBZVWVGFBCN-UHFFFAOYSA-N | CHEMONTID:0002500 |
| n-Hexatriacontane            | CCCCCCCCCCCCCCCCCCCC             | YDLYQMBWCWFRAI-UHFFFAOYSA-N | CHEMONTID:0002500 |
| n-Octatriacontane            | CCCCCCCCCCCCCCCCCCCC             | BVKCQBBZBGNOP-UHFFFAOYSA-N  | CHEMONTID:0002500 |
| n-Tetracontane               | CCCCCCCCCCCCCCCCCCCC             | KUPLEGDPSCCPJ-UHFFFAOYSA-N  | CHEMONTID:0002500 |
| Ribitol                      | C(C(C(C(CO)O)O)O)O               | HEBKCHPVOIAQTA-UHFFFAOYSA-N | CHEMONTID:0000011 |
| Adonitol                     | C(C(C(C(CO)O)O)O)O               | HEBKCHPVOIAQTA-UHFFFAOYSA-N | CHEMONTID:0000011 |



**Table S6. Curated annotation in the dataset MSV000084039**

| DataBaseID | CompoundName           | InChIKey                     | MZ  | KEGGID | PubChemID | subclass          |
|------------|------------------------|------------------------------|-----|--------|-----------|-------------------|
| 31632      | xylulose NIST          | LQXVFWRQNMEDEE-PYHARJCCSA-N  | 173 | C00312 | 439205    | CHEMONTID:0000011 |
| 169        | xylose                 | SRBFZHDQGSBBOR-IOVATXLUSA-N  | 103 | C00181 | 135191    | CHEMONTID:0000011 |
| 5857       | xylitol                | HEBKCHPVOIAQTA-NGQZWQHPSA-N  | 217 | C00379 | 6912      | CHEMONTID:0000011 |
| 3          | valine                 | KZSNJWFQEVHDMF-BYPYZUCNSA-N  | 144 | C00183 | 6287      | CHEMONTID:0000013 |
| 14815      | uridine                | DRTQHJPMVMBUCF-XVFCMESISA-N  | 217 | C00299 | 6029      |                   |
| 33210      | uric acid              | LEHOTFFKMJEONL-UHFFFAOYSA-N  | 441 | C00366 | 1175      | CHEMONTID:0000245 |
| 145496     | urea                   | XSQUKJJFZCRTK-UHFFFAOYSA-N   | 189 | C00086 | 1176      | CHEMONTID:0000517 |
| 1664       | uracil                 | ISAKRJDGNUQOIC-UHFFFAOYSA-N  | 241 | C00106 | 1174      | CHEMONTID:0000075 |
| 16         | tyrosine               | OUYCCCASQSFEME-QMMMGPBSA-N   | 218 | C00082 | 6057      | CHEMONTID:0000013 |
| 14         | tryptophan             | QIVBCDIJAJPQS-VIFPVBQESA-N   | 202 | C00078 | 6305      | CHEMONTID:0001290 |
| 97         | trans-4-hydroxyproline | PMMYEEVYMWASQN-DMTCNVIQSA-N  | 140 | C01157 | 5810      | CHEMONTID:0000013 |
| 1692       | thymine                | RWQNBRDOKXIBIV-UHFFFAOYSA-N  | 255 | C00178 | 1135      | CHEMONTID:0000075 |
| 87703      | thymidine              | IQFYKMKMVGJFEH-XLPZGREQSA-N  | 170 | C00214 | 5789      | CHEMONTID:0002180 |
| 26         | threonine              | AYFVYJQAPQTCCC-GBXIJSLSA-N   | 218 | C00188 | 6288      | CHEMONTID:0000013 |
| 172        | threonic acid          | JPIJQSOTBSSVTP-STHAYSLISA-N  | 292 | C01620 | 5460407   | CHEMONTID:0000011 |
| 411        | taurine                | XOAAWQZATWQOTB-UHFFFAOYSA-N  | 326 | C00245 | 1123      | CHEMONTID:0000270 |
| 12266      | sulfuric acid          | QAOWNCQODCNURD-UHFFFAOYSA-N  | 227 | C00059 | 1118      | CHEMONTID:0001077 |
| 173        | sucrose                | CZMRCDWAGMRECN-UGDNZRGBSA-N  | 271 | C00089 | 5988      | CHEMONTID:0000011 |
| 161        | succinic acid          | KDYFGRWQOYBRFD-UHFFFAOYSA-N  | 247 | C00042 | 1110      | CHEMONTID:0000346 |
| 13         | stearic acid           | QIQXTHQIDYTFRH-UHFFFAOYSA-N  | 117 | C01530 | 5281      | CHEMONTID:0000262 |
| 25         | serine                 | MTCFGRXMJLQNBG-REOHCLBHSA-N  | 218 | C00065 | 5951      | CHEMONTID:0000013 |
| 11214      | saccharic acid         | DSLZVSRJTYRBFB-LLEIAEIESA-N  | 333 | C00818 | 33037     | CHEMONTID:0000011 |
| 1662       | ribose                 | HMFHBZSHGGEWLO-SOOFDHNKSA-N  | 217 | C00121 | 5779      | CHEMONTID:0000011 |
| 1683       | ribonic acid           | QXKAIJAYHKCRRRA-BXXZVTAOSA-N | 292 | C01685 | 5460677   | CHEMONTID:0000011 |
| 7362       | ribitol                | HEBKCHPVOIAQTA-ZXFHETKHSAN   | 217 | C00474 | 827       | CHEMONTID:0000011 |
| 3190       | raffinose              | MUPFEKGTMRGPLJ-ZQSKZDJDSA-N  | 361 | C00492 | 439242    | CHEMONTID:0000011 |
| 66         | pyruvic acid           | LCTONWCANYUPML-UHFFFAOYSA-N  | 174 | C00022 | 1060      | CHEMONTID:0001113 |
| 1688       | pseudo uridine         | PTJWIQPHWPFNBW-GBNDHIKLSA-N  | 217 | C02067 | 15047     |                   |
| 171970     | proline                | ONIBWKKTOPOVIA-BYPYZUCNSA-N  | 142 | C00148 | 145742    | CHEMONTID:0000013 |

|       |                      |                              |     |        |         |                   |
|-------|----------------------|------------------------------|-----|--------|---------|-------------------|
| 16544 | pinitol              | DSCFFEYYQKSRSV-FEPQRWDDSA-N  | 260 | C03844 | 164619  | CHEMONTID:0000129 |
| 33429 | pimelic acid         | WLJVNTCWHIRURA-UHFFFAOYSA-N  | 155 | C02656 | 385     | CHEMONTID:0000262 |
| 4     | phosphate            | NBIIXXVUZAFNBC-UHFFFAOYSA-N  | 314 | C00009 | 1004    | CHEMONTID:0001073 |
| 2005  | phenylethylamine     | BHHGXPLMPWCGHP-UHFFFAOYSA-N  | 174 | C05332 | 1001    | CHEMONTID:0000186 |
| 33    | phenylalanine        | COLNVLDHVKWLRT-QMMMGOBSA-N   | 218 | C00079 | 6140    | CHEMONTID:0000013 |
| 31889 | phenol               | ISWSIDIOOJBQZ-UHFFFAOYSA-N   | 151 | C00146 | 996     | CHEMONTID:0004647 |
| 50    | pelargonic acid      | FBUKVWPVBMHYJY-UHFFFAOYSA-N  | 117 | C01601 | 8158    | CHEMONTID:0000262 |
| 31356 | pantothenic acid     | GHOKWGTUZEJEAQD-ZETCQYMHSA-N | 291 | C12276 | 6613    | CHEMONTID:0000129 |
| 96    | palmitoleic acid     | SECPZKHBENQXJG-FPLPWBNSA-N   | 311 | C08362 | 445638  | CHEMONTID:0000262 |
| 11    | palmitic acid        | IPCSVZSSVZVIGE-UHFFFAOYSA-N  | 313 | C00249 | 985     | CHEMONTID:0000262 |
| 10    | oxoproline           | ODHCTXKNWHXJC-VKHMHEASA-N    | 156 | C01879 | 7405    | CHEMONTID:0000013 |
| 4923  | oxalic acid          | MUBZPKHOEPUJKR-UHFFFAOYSA-N  | 190 | C00209 | 971     | CHEMONTID:0000346 |
| 1821  | ornithine            | AHLPHDHHMVZTML-BYPYZUCNSA-N  | 142 | C00077 | 6262    | CHEMONTID:0000013 |
| 43    | oleic acid           | ZQPPMHVWECSIRJ-KTKRTIGZSA-N  | 339 | C00712 | 445639  | CHEMONTID:0000262 |
| 997   | octadecanol          | GLDOVTGHNKAZLK-UHFFFAOYSA-N  | 327 |        | 8221    | CHEMONTID:0001334 |
| 127   | myristic acid        | TUNFSRHWOTWDNC-UHFFFAOYSA-N  | 285 | C06424 | 11005   | CHEMONTID:0000262 |
| 1741  | myo-inositol         | CDASIMWEOUEBRE-UHFFFAOYSA-N  | 305 | C00137 | 892     | CHEMONTID:0000129 |
| 1678  | methionine sulfoxide | QEFRNWWLZKMPFJ-YGVKFDHGSA-N  | 128 | C02989 | 158980  | CHEMONTID:0000013 |
| 45    | methionine           | FFEARJCKVFRZRR-BYPYZUCNSA-N  | 176 | C00073 | 6137    | CHEMONTID:0000013 |
| 70    | mannose              | WQZGKKKJIJFFOK-QTVWNMPRSA-N  | 205 | C00159 | 18950   | CHEMONTID:0000011 |
| 1979  | maltose              | GUBGYTABKSRVRQ-PICCSMPSSA-N  | 204 | C00208 | 439186  | CHEMONTID:0000011 |
| 1391  | malic acid           | BJEPYKJPYRNKOW-UHFFFAOYSA-N  | 233 | C00711 | 525     | CHEMONTID:0001713 |
| 85112 | lyxose               | SRBFZHDQGSBBOR-AGQMPKSLSA-N  | 217 | C00476 | 439240  | CHEMONTID:0000011 |
| 233   | lyxitol              | HEBKCHPVOIAQTA-IMJSIDKUSA-N  | 217 | C00532 | 439255  | CHEMONTID:0000011 |
| 12    | lysine               | KDXKERNBIXSRK-YFKPBYRVSA-N   | 156 | C00047 | 5962    | CHEMONTID:0000013 |
| 165   | linoleic acid        | OYHQOLUKZRVURQ-HZJYTTRNSA-N  | 150 | C01595 | 5280450 | CHEMONTID:0000504 |
| 9     | leucine              | ROHFNLRQFUQHCH-YFKPBYRVSA-N  | 158 | C00123 | 6106    | CHEMONTID:0000013 |
| 49    | lauric acid          | POULHZVOKOAJMA-UHFFFAOYSA-N  | 117 | C02679 | 3893    | CHEMONTID:0000262 |
| 80    | lactic acid          | JVTAAEKCFZFNVCJ-UHFFFAOYSA-N | 191 | C01432 | 612     | CHEMONTID:0001359 |
| 415   | lactamide            | SXQFCVDSOLSHOQ-UHFFFAOYSA-N  | 232 |        | 94220   | CHEMONTID:0000129 |
| 1679  | isothreonic acid     | JPIJQSOTBSSVTP-GBXISLDSA-N   | 292 | C00639 | 151152  | CHEMONTID:0000011 |

|        |                          |                              |     |        |          |                   |
|--------|--------------------------|------------------------------|-----|--------|----------|-------------------|
| 15     | isoleucine               | AGPKZVBTJJNPAG-WHFBIAKZSA-N  | 158 | C00407 | 6306     | CHEMONTID:0000013 |
| 100866 | isohexonic acid          | RGHNJXZEOKUKBD-UHFFFAOYSA-N  | 333 |        | 604      | CHEMONTID:0000299 |
| 32122  | isocitric acid           | ODBLHEXUDAPZAU-ZAFYKAAAXSA-N | 245 | C00451 | 5318532  | CHEMONTID:0001986 |
| 84524  | inosine                  | UGQMRVRMYASKQ-KQYNXXCUSA-N   | 230 | C00294 | 6021     |                   |
| 31543  | indoxyl sulfate          | BXFFHSIDQOFMLE-UHFFFAOYSA-N  | 277 |        | 10258    | CHEMONTID:0004258 |
| 112556 | indole-3-propionic acid  | GOLXRNDWAUTYKT-UHFFFAOYSA-N  | 202 |        | 3744     | CHEMONTID:0001290 |
| 724    | indole-3-lactate         | XGILAAAMKEQUXLS-UHFFFAOYSA-N | 202 | C02043 | 92904    | CHEMONTID:0001290 |
| 69     | indole-3-acetate         | SEOVTRFCIGRIMH-UHFFFAOYSA-N  | 202 | C00954 | 802      | CHEMONTID:0001290 |
| 139    | hydroxylamine            | AVXURJPOCDRRFD-UHFFFAOYSA-N  | 146 | C00192 | 787      |                   |
| 130396 | hydroxycarbamate NIST    | DRAJWRKLRBNJRQ-UHFFFAOYSA-M  | 278 |        | 16639161 |                   |
| 114270 | hydrocinnamic acid       | XMIIGOLPHOKFCH-UHFFFAOYSA-N  | 104 | C05629 | 107      |                   |
| 33211  | hippuric acid            | QIAFMBKCNZACKA-UHFFFAOYSA-N  | 206 | C01586 | 464      | CHEMONTID:0000176 |
| 4554   | hexuronic acid           | IAJILQKETJEXLJ-UHFFFAOYSA-N  | 160 |        | 152867   | CHEMONTID:0000011 |
| 20287  | hexose                   | WQZGKKKJIJFFOK-UHFFFAOYSA-N  | 319 | C00738 | 206      | CHEMONTID:0000011 |
| 255    | hexitol                  | FBPFZTCFMRRESA-UHFFFAOYSA-N  | 217 | C00392 | 453      | CHEMONTID:0000011 |
| 120765 | hexadecane               | DCAYPVUWAIABOU-UHFFFAOYSA-N  | 85  |        | 11006    | CHEMONTID:0002500 |
| 727    | heptadecanoic acid       | KEMQGTRYUADPNZ-UHFFFAOYSA-N  | 117 |        | 10465    | CHEMONTID:0000262 |
| 1971   | glycolic acid            | AEMRFAOFKBGASW-UHFFFAOYSA-N  | 177 | C00160 | 757      | CHEMONTID:0001359 |
| 6      | glycine                  | DHMQDGOQFOQNFH-UHFFFAOYSA-N  | 248 | C00037 | 750      | CHEMONTID:0000013 |
| 1687   | glycerol-alpha-phosphate | AWUCVROLDVIAJX-UHFFFAOYSA-N  | 357 | C03189 | 754      | CHEMONTID:0002214 |
| 1693   | glycerol-3-galactoside   | NHJUPBDCSOGIKX-NTXXKDEISA-N  | 204 | C05401 | 16048618 | CHEMONTID:0000637 |
| 30     | glycerol                 | PEDCQBHIVMGVHV-UHFFFAOYSA-N  | 205 | C00116 | 753      | CHEMONTID:0000011 |
| 48     | glyceric acid            | RBNPOMFGQQGHHO-UWTATZPHSA-N  | 189 | C00258 | 439194   | CHEMONTID:0000011 |
| 171972 | glutamine                | ZDXPYRJPNDTMRX-VKHMHEASA-N   | 156 | C00064 | 5961     | CHEMONTID:0000013 |
| 16576  | glutamic acid            | WHUUTDBJXRKMK-VKHMHEASA-N    | 246 | C00025 | 33032    | CHEMONTID:0000013 |
| 3167   | glucose-1-phosphate      | HXXFSFRBOHSIMQ-VFUOTHLCSA-N  | 217 | C00103 | 65533    | CHEMONTID:0000011 |
| 71     | glucose                  | WQZGKKKJIJFFOK-VFUOTHLCSA-N  | 217 | C00221 | 64689    | CHEMONTID:0000011 |
| 14755  | fumaric acid             | VZCYOOQTPOCHFL-OWOJBTEDSA-N  | 245 | C00122 | 444972   | CHEMONTID:0000346 |
| 3009   | fucose                   | SHZGCJCMOBCMCK-FPRJBGLDSA-N  | 160 | C02095 | 439650   | CHEMONTID:0000011 |
| 21     | fructose                 | RFSUNEUAIZKAJO-ARQDHWQXSA-N  | 307 | C02336 | 439709   | CHEMONTID:0000011 |
| 3212   | ethanolamine             | HZAXFHJVJLSVMW-UHFFFAOYSA-N  | 174 | C00189 | 700      | CHEMONTID:0002449 |

|        |                                   |                             |     |        |          |                   |
|--------|-----------------------------------|-----------------------------|-----|--------|----------|-------------------|
| 92     | erythritol                        | UNXHWFMMPAWVPI-ZXZARUISSA-N | 217 | C00503 | 222285   | CHEMONTID:0000011 |
| 12092  | dodecanol                         | LQZZUXJYWNFBMV-UHFFFAOYSA-N | 243 | C02277 | 8193     | CHEMONTID:0001334 |
| 126903 | D-erythro-sphingosine             | WWUZIQQURGPMPG-KRWOKUGFSA-N | 204 | C00319 | 5280335  | CHEMONTID:0002449 |
| 94     | cystine                           | LEVWYRKDKASIDU-UHFFFAOYSA-N | 218 | C01420 | 595      | CHEMONTID:0000013 |
| 65     | cysteine                          | XUJNEKJLAYXESH-REOHCLBHSA-N | 220 | C00097 | 5862     | CHEMONTID:0000013 |
| 31     | creatinine                        | DDRJAANPRJIHGJ-UHFFFAOYSA-N | 115 | C00791 | 588      | CHEMONTID:0000013 |
| 2670   | conduritol-beta-epoxide           | ZHMWOVGZCINIHW-SPHYCDKFSA-N | 318 |        | 9989541  |                   |
| 1712   | citrulline                        | RHGKLRLOHDJJDR-BYPYZUCNSA-N | 157 | C00327 | 9750     | CHEMONTID:0000013 |
| 288    | citric acid                       | KRKNYBCHXYNGOX-UHFFFAOYSA-N | 273 | C00158 | 311      | CHEMONTID:0001986 |
| 31654  | catechol                          | YCIMNLLNPGFGHC-UHFFFAOYSA-N | 254 | C00090 | 289      | CHEMONTID:0001286 |
| 6866   | caprylic acid                     | WWZKQHOCKIZLMA-UHFFFAOYSA-N | 201 | C06423 | 379      | CHEMONTID:0000262 |
| 50422  | capric acid                       | GHVNFZFCNZKVNT-UHFFFAOYSA-N | 229 | C01571 | 2969     | CHEMONTID:0000262 |
| 148    | beta-alanine                      | UCMIRNVEIXFBKS-UHFFFAOYSA-N | 248 | C00099 | 239      | CHEMONTID:0000013 |
| 36     | benzoic acid                      | WPYMKLBDIGXBTP-UHFFFAOYSA-N | 179 | C00180 | 243      | CHEMONTID:0000176 |
| 79     | aspartic acid                     | CKLJMWTZIZZHCS-REOHCLBHSA-N | 232 | C00049 | 5960     | CHEMONTID:0000013 |
| 146    | asparagine                        | DCXYFEDJOCDNAF-REOHCLBHSA-N | 188 | C00152 | 6267     | CHEMONTID:0000013 |
| 291    | arachidic acid                    | VKOBVWXKNCXXDE-UHFFFAOYSA-N | 117 | C06425 | 10467    | CHEMONTID:0000262 |
| 413    | aminomalonate                     | JINBYESILADKFW-UHFFFAOYSA-N | 218 | C00872 | 100714   | CHEMONTID:0000013 |
| 294    | alpha-ketoglutarate               | KPGXRSRHYNQIFN-UHFFFAOYSA-N | 198 | C00026 | 51       | CHEMONTID:0001115 |
| 125502 | alpha-aminoadipic acid            | OYIFNHCXNCRBQI-BYPYZUCNSA-N | 260 | C00956 | 92136    | CHEMONTID:0000013 |
| 33396  | allantoic acid                    | NUCLJNSWZCHRKL-UHFFFAOYSA-N | 259 | C00499 | 203      | CHEMONTID:0000013 |
| 34178  | alanine                           | QNAYBMKLOCPYGJ-REOHCLBHSA-N | 116 | C00041 | 5950     | CHEMONTID:0000013 |
| 290    | adenosine                         | OIRDTQYFTABQOQ-KQYNXXCUSA-N | 236 | C00212 | 60961    |                   |
| 92567  | 6-deoxyglucitol                   | SKCKOFZKJLZSFA-JGWLITMVSA-N | 117 |        | 151266   | CHEMONTID:0000011 |
| 284    | 5-methoxytryptamine               | JTEJPPKMYBDEMY-UHFFFAOYSA-N | 174 | C05659 | 1833     | CHEMONTID:0000183 |
| 85123  | 4-hydroxybutyric acid             | SJZRECIVHVDYJC-UHFFFAOYSA-N | 233 | C00989 | 10413    | CHEMONTID:0000262 |
| 1977   | 3-hydroxypropionic acid           | ALRHLSYJTWAHJZ-UHFFFAOYSA-N | 177 | C01013 | 68152    | CHEMONTID:0001713 |
| 46     | 3-hydroxybutyric acid             | WHBMMWSBFZVSSR-GSVOUGTGSA-N | 191 | C01089 | 92135    | CHEMONTID:0001713 |
| 12265  | 3-aminoisobutyric acid            | QCHPKSFMDHPSNR-UHFFFAOYSA-N | 248 | C05145 | 64956    | CHEMONTID:0000013 |
| 102714 | 3,6-anhydro-D-galactose           | WZYRMLAWNVOIEX-BGPJRJDNSA-N | 231 | C06474 | 16069996 |                   |
| 49497  | 3-(3-hydroxyphenyl)propionic acid | QVWAEZJXDYOKEH-UHFFFAOYSA-N | 192 | C11457 | 91       |                   |



|                               |                              |                                          |          |         |        |                   |
|-------------------------------|------------------------------|------------------------------------------|----------|---------|--------|-------------------|
| 208                           | 2-ketoisocaproic acid        | BKAJNAXTPSGJCU-UHFFFAOYSA-N              | 89       | C00233  | 70     | CHEMONTID:0001416 |
| 2000                          | 2-hydroxyglutaric acid       | HWXBTNAVRSUOJR-UHFFFAOYSA-N              | 247      | C02630  | 43     | CHEMONTID:0000266 |
| 40                            | 2-hydroxybutanoic acid       | AFENDNXGAFYKQO-VKHMYHEASA-N              | 131      | C05984  | 440864 | CHEMONTID:0001359 |
| 1208                          | 2-deoxytetronic acid         | DZAIOXUZHHTJKN-UHFFFAOYSA-N              | 189      |         | 150929 | CHEMONTID:0001713 |
| 160842                        | 2-aminobutyric acid          | QWCKQJZIFLGMSD-UHFFFAOYSA-N              | 130      | C02721  | 6657   | CHEMONTID:0000013 |
| 125664                        | 1,3,5-trimethylcyanuric acid | AHWDQDMGFXRVFB-UHFFFAOYSA-N              | 171      |         |        | CHEMONTID:0001920 |
|                               |                              |                                          |          |         |        |                   |
|                               |                              |                                          |          |         |        |                   |
| Additional annotations: FAMES |                              |                                          | InChiKey |         |        |                   |
| BinID                         | CompoundName                 | Name (CAS)                               |          | RI      |        |                   |
| 14391                         | z C08 FAME internal standard | C8:0 Methyl caprylate (111-11-5), 4%     | JGH      | 262320  |        |                   |
| 14356                         | z C09 FAME internal standard | Methyl nonanoate (1731-84-6)             | IJXH     | 323120  |        |                   |
| 14348                         | z C10 FAME internal standard | C10:0 Methyl decanoate (110-42-9), 4%    | YRH      | 381020  |        |                   |
| 15538                         | z C12 FAME internal standard | C12:0 Methyl dodecanoate (111-82-0), 4%  | UQD      | 487220  |        |                   |
| 14330                         | z C14 FAME internal standard | C14:0 Methyl myristate (124-10-7), 4%    | ZAZ      | 582620  |        |                   |
| 14328                         | z C16 FAME internal standard | C16:0 Methyl palmitate (112-39-0), 6%    | FLIA     | 668720  |        |                   |
| 14344                         | z C18 FAME internal standard | C18:0 Methyl stearate (112-61-8), 4%     | HPE      | 747420  |        |                   |
| 14338                         | z C20 FAME internal standard | C20:0 Methyl arachidate (1120-28-1), 4%  | QGE      | 819620  |        |                   |
| 14350                         | z C22 FAME internal standard | C22:0 Methyl behenate (929-77-1), 4%     | QSC      | 886620  |        |                   |
| 14373                         | z C24 FAME internal standard | C24:0 Methyl lignocerate (2442-49-1), 4% | XUD      | 948820  |        |                   |
| 14367                         | z C26 FAME internal standard | C24:0 Methyl Hexacosanoate               | VHU      | 1006900 |        |                   |
| 14378                         | z C28 FAME internal standard | C24:0 Methyl Octacosanoate               | ZKH      | 1061700 |        |                   |
| 14441                         | z C30 FAME internal standard | C24:0 Methyl Triacontanoate              | BIRU     | 1113100 |        |                   |

| Table S7. Curated annotation in the dataset MSV000084349 |                              |         |     |          |             |                               |                   |
|----------------------------------------------------------|------------------------------|---------|-----|----------|-------------|-------------------------------|-------------------|
| Nist ID                                                  | Name                         | Formula | CAS | R.T. (s) | XIC(Masses) | InChIKey                      | subclass          |
| 34064                                                    | Dimethyl sulfide             | C2H6S   |     | 115.704  | 62.018      |                               |                   |
| 35900                                                    | Furan                        | C4H4O   |     | 130.244  | 68.026      | YLQBMQCUIZJEEH-UHFFFAOYSA-N   |                   |
| 6707                                                     | Isobutanal                   | C4H8O   |     | 135.469  | 72.057      | AMIMRNSIRUDHCM-UHFFFAOYSA-N   | CHEMONTID:0001831 |
| 8607                                                     | Acetone                      | C3H6O   |     | 137.381  | 58.041      | CSCPPACGZOO CGX-UHFFFAOYSA-N  | CHEMONTID:0001831 |
| 1688                                                     | Ethyl formate                | C3H6O2  |     | 142.582  | 74.036      |                               |                   |
| 23642                                                    | 2-Propenal                   | C3H4O   |     | 153.217  | 56.026      | HGINCPLSRVDWNT-UHFFFAOYSA-N   | CHEMONTID:0001831 |
| 4858                                                     | Tetrahydrofuran              | C4H8O   |     | 158.808  | 72.057      | WYURNTSHIVDZCO-UHFFFAOYSA-N   |                   |
| 55654                                                    | 3-Methylfuran                | C5H6O   |     | 166.158  | 53.039      | KJRRQXYWFQKJIP-UHFFFAOYSA-N   |                   |
| 3818                                                     | Methacrolein                 | C4H6O   |     | 172.695  | 70.041      | STNJBCSHOAVAJ-UHFFFAOYSA-N    | CHEMONTID:0001831 |
| 8863                                                     | Ethyl acetate                | C4H8O2  |     | 177.359  | 61.028      |                               |                   |
| 55653                                                    | 2-Methylfuran                | C5H6O   |     | 183.673  | 53.039      | VQKFNUFAXTZWDK-UHFFFAOYSA-N   |                   |
| 9850                                                     | Butanone                     | C4H8O   |     | 186.91   | 72.057      | ZWEHNKRNP OV VGH-UHFFFAOYSA-N | CHEMONTID:0001831 |
| 632                                                      | Methyl propanoate            | C4H8O2  |     | 192.749  | 57.033      |                               |                   |
| 2323                                                     | 2-Methylbutanal              | C5H10O  |     | 196.761  | 58.041      | BYGQBDHUGHBGMD-UHFFFAOYSA-N   | CHEMONTID:0001831 |
| 16524                                                    | 3-Methylbutanal              | C5H10O  |     | 201.574  | 58.041      | YGHRJJRRZDOVPD-UHFFFAOYSA-N   | CHEMONTID:0001831 |
| 9383                                                     | Methyl isobutanoate          | C5H10O2 |     | 207.95   | 102.068     |                               |                   |
| 6785                                                     | 3-Methyl-2-butanone          | C5H10O  |     | 214.162  | 86.073      | SYBYTAAJFKOIEJ-UHFFFAOYSA-N   | CHEMONTID:0001831 |
| 76298                                                    | 2,5-Dimethylfuran            | C6H8O   |     | 243.478  | 96.057      | GSNUFIFRDBKVIE-UHFFFAOYSA-N   |                   |
| 616                                                      | Ethyl propanoate             | C5H10O2 |     | 249.59   | 57.033      |                               |                   |
| 9330                                                     | Ethyl isobutanoate           | C6H12O2 |     | 259.629  | 89.06       |                               |                   |
| 8875                                                     | n-Propyl acetate             | C5H10O2 |     | 271.867  | 61.028      |                               |                   |
| 53132                                                    | (E,E)-1,3,5-Heptatriene      | C7H10   |     | 271.98   | 94.078      | USKZHEQYENVSMH-YDFGWWAZSA-N   | CHEMONTID:0002838 |
| 10763                                                    | 2-Pentanone                  | C5H10O  |     | 272.792  | 86.073      | XNLICIUVMPYHGG-UHFFFAOYSA-N   | CHEMONTID:0001831 |
| 83720                                                    | Isobutanal diethyl acetal    | C8H18O2 |     | 273.913  | 47.013      |                               |                   |
| 10770                                                    | 2,3-Butanedione              | C4H6O2  |     | 281.881  | 86.036      | QSJXEFYPDANLFS-UHFFFAOYSA-N   | CHEMONTID:0001831 |
| 25801                                                    | 2-Methyl-3-pentanone         | C6H12O  |     | 297.994  | 100.088     | HYTRYEXINDDXJK-UHFFFAOYSA-N   | CHEMONTID:0001831 |
| 8623                                                     | Methyl isobutyl ketone       | C6H12O  |     | 314.495  | 100.088     |                               |                   |
| 28046                                                    | Methyl 2-methylbutanoic acid | C6H12O2 |     | 320.071  | 88.052      |                               |                   |
| 72826                                                    | alpha-Pinene                 | C10H16  |     | 325.871  | 136.125     | GRWFGVWFFZKLT I-UHFFFAOYSA-N  | CHEMONTID:0001549 |
| 6013                                                     | 3-Methyl-2-pentanone         | C6H12O  |     | 327.084  | 100.088     | UIHCLUNTQKBZGK-UHFFFAOYSA-N   | CHEMONTID:0001831 |
| 8100                                                     | Isobutyl acetate             | C6H12O2 |     | 327.884  | 56.062      |                               |                   |
| 48778                                                    | Methyl 3-methylbutanoic acid | C6H12O2 |     | 336.36   | 74.036      |                               |                   |

|        |                               |         |  |         |         |                             |                   |
|--------|-------------------------------|---------|--|---------|---------|-----------------------------|-------------------|
| 72814  | alpha-Thujene                 | C10H16  |  | 338.622 | 136.125 | KQAZVFVOEIRWHN-UHFFFAOYSA-N | CHEMONTID:0001549 |
| 75229  | 2-Ethyl-5-methylfuran         | C7H10O  |  | 356.362 | 110.073 | NBXLPPVOZWYADY-UHFFFAOYSA-N |                   |
| 65916  | Toluene                       | C7H8    |  | 363.862 | 92.062  | YXFVVABEGXRONW-UHFFFAOYSA-N | CHEMONTID:0001091 |
| 41373  | Ethyl butanoate               | C6H12O2 |  | 365.312 | 88.052  |                             |                   |
| 1686   | 1-Propanol                    | C3H8O   |  | 371.25  | 60.057  | BDERNNFJNOPAEC-UHFFFAOYSA-N | CHEMONTID:0000129 |
| 24922  | Propyl propanoate             | C6H12O2 |  | 378.926 | 75.044  |                             |                   |
| 10976  | Methyl thioacetate            | C3H6OS  |  | 383.426 | 90.013  |                             |                   |
| 24934  | Ethyl 2-methylbutanoate       | C7H14O2 |  | 390.589 | 102.068 |                             |                   |
| 9323   | Propyl isobutanoate           | C7H14O2 |  | 392.765 | 89.06   |                             |                   |
| 6011   | 2,3-Pentanedione              | C5H8O2  |  | 411.828 | 100.052 | TZMFJUDUGYTVRY-UHFFFAOYSA-N | CHEMONTID:0001831 |
| 62925  | Ethyl 3-methylbutanoate       | C7H14O2 |  | 417.842 | 88.052  |                             |                   |
| 73825  | Dimethyl disulfide            | C2H6S2  |  | 419.217 | 93.991  |                             |                   |
| 73726  | 2-Vinylfuran                  | C6H6O   |  | 430.48  | 94.041  | QQBUHYQVKJQAOB-UHFFFAOYSA-N |                   |
| 83623  | Isopentanal diethyl acetal    | C9H20O2 |  | 433.63  | 103.075 |                             |                   |
| 24900  | Isobutyl propanoate           | C7H14O2 |  | 437.868 | 57.033  |                             |                   |
| 77201  | 2-Methylthiophene             | C5H6S   |  | 450.119 | 98.018  | XQQBUAPQHNYRS-UHFFFAOYSA-N  |                   |
| 41541  | Isobutyl isobutanoate         | C8H16O2 |  | 454.794 | 89.06   |                             |                   |
| 72372  | beta-Pinene                   | C10H16  |  | 455.832 | 136.125 | WTARULDDTDQWMU-UHFFFAOYSA-N | CHEMONTID:0001549 |
| 53146  | 1,3-(Z),5-(Z)-Octatriene      | C8H12   |  | 469.133 | 108.093 |                             |                   |
| 53571  | 1,3-(E),5-(Z)-Octatriene      | C8H12   |  | 472.608 | 108.093 |                             |                   |
| 137440 | Pyranoid linalool             | C10H18O |  | 473.933 | 139.112 |                             |                   |
| 6347   | Isobutanol                    | C4H10O  |  | 473.896 | 74.073  | ZXEKIIBDNHEJQC-UHFFFAOYSA-N | CHEMONTID:0000129 |
| 72809  | Sabinene                      | C10H16  |  | 483.534 | 136.125 | NDVASEGYNIMXJL-UHFFFAOYSA-N | CHEMONTID:0001549 |
| 77202  | 3-Methylthiophene             | C5H6S   |  | 500.898 | 98.018  | QENGPZGAWFQWCZ-UHFFFAOYSA-N |                   |
| 9248   | 1-Butanol, 2-methyl-, acetate | C7H14O2 |  | 509.999 | 101.06  |                             |                   |
| 9247   | 1-Butanol, 3-methyl-, acetate | C7H14O2 |  | 513.236 | 87.044  |                             |                   |
| 66555  | 1,4-Xylene                    | C8H10   |  | 522.162 | 106.078 | URLKBWYHVLBVBO-UHFFFAOYSA-N | CHEMONTID:0004208 |
| 9378   | Methyl thioisobutanoate       | C5H10OS |  | 525.737 | 118.045 |                             |                   |
| 54349  | 2-Butylfuran                  | C8H12O  |  | 527.712 | 124.088 | NWZIQNUCXUJJJ-UHFFFAOYSA-N  |                   |
| 56990  | 4-Methyl-3-pentene-2-one      | C6H10O  |  | 527.337 | 98.073  | SHOJXDKTYKFBRD-UHFFFAOYSA-N | CHEMONTID:0001831 |
| 66554  | 1,3-Xylene                    | C8H10   |  | 533.663 | 106.078 | IVSZLXZYQVIEFR-UHFFFAOYSA-N | CHEMONTID:0004208 |
| 719    | Ethyl pentanoate              | C7H14O2 |  | 534.938 | 88.052  |                             |                   |
| 26352  | Propyl 2-methylbutanoate      | C8H16O2 |  | 540.288 | 116.083 |                             |                   |
| 73174  | 2-Carene                      | C10H16  |  | 542.689 | 136.125 | IBVJWOMJGCHRRW-UHFFFAOYSA-N | CHEMONTID:0001549 |
| 24903  | Butyl propanoate              | C7H14O2 |  | 545.902 | 75.044  |                             |                   |

|        |                                           |         |  |         |         |                              |                   |
|--------|-------------------------------------------|---------|--|---------|---------|------------------------------|-------------------|
| 8608   | 5-Methyl-2-hexanone                       | C7H14O  |  | 546.314 | 114.104 | FFWSICBKRCICMR-UHFFFAOYSA-N  | CHEMONTID:0001831 |
| 73177  | 4-Carene                                  | C10H16  |  | 550.677 | 136.125 | LGNSZMLHOYDATP-UHFFFAOYSA-N  | CHEMONTID:0001549 |
| 48779  | Methyl isohexanoate                       | C7H14O2 |  | 550.589 | 74.036  |                              |                   |
| 9620   | Butyl isobutanoate                        | C8H16O2 |  | 556.49  | 89.06   |                              |                   |
| 27879  | 2,5-Dimethyl-3-hexanone                   | C8H16O  |  | 558.165 | 128.12  | TUIWMHDSXJWXOH-UHFFFAOYSA-N  | CHEMONTID:0001831 |
| 1764   | 1-Butanol                                 | C4H10O  |  | 562.7   | 56.062  | LRHPLDYGYMQRHN-UHFFFAOYSA-N  | CHEMONTID:0000129 |
| 72819  | alpha-Phellandrene                        | C10H16  |  | 570.816 | 136.125 | OGLDWXZKYODSOB-UHFFFAOYSA-N  | CHEMONTID:0001549 |
| 60194  | Propyl 3-methylbutanoate                  | C8H16O2 |  | 573.916 | 60.021  |                              |                   |
| 4103   | beta-Myrcene                              | C10H16  |  | 588.305 | 136.125 | UAHWPYUMFYFJY-UHFFFAOYSA-N   | CHEMONTID:0001549 |
| 112331 | alpha-Terpinene                           | C10H16  |  | 600.831 | 136.125 | YHQGMVUVUMAZJR-UHFFFAOYSA-N  | CHEMONTID:0001549 |
| 9239   | n-Pentyl acetate                          | C7H14O2 |  | 606.482 | 61.028  |                              |                   |
| 27927  | Isobutyl 2-methylbutanoate                | C9H18O2 |  | 608.769 | 130.099 |                              |                   |
| 66558  | 1,2-Xylene                                | C8H10   |  | 613.994 | 106.078 | CTQNGGLPUBDAKN-UHFFFAOYSA-N  | CHEMONTID:0004208 |
| 52928  | Pyridine                                  | C5H5N   |  | 613.357 | 52.031  | JUJWROOIHBZHMG-UHFFFAOYSA-N  |                   |
| 8609   | 2-Heptanone                               | C7H14O  |  | 619.558 | 114.104 | CATSNJVOTSVZJV-UHFFFAOYSA-N  | CHEMONTID:0001831 |
| 93779  | 2,3-Dehydroeucalyptol                     | C10H16O |  | 621.42  | 109.065 |                              |                   |
| 40010  | Heptanal                                  | C7H14O  |  | 624.708 | 70.078  | FXHGMKSSBGDXIY-UHFFFAOYSA-N  | CHEMONTID:0001831 |
| 24888  | 2-Methylbutyl propanoate                  | C8H16O2 |  | 631.871 | 114.104 |                              |                   |
| 27102  | 3-Methylbutyl propanoate                  | C8H16O2 |  | 634.54  | 101.06  |                              |                   |
| 36348  | Limonene                                  | C10H16  |  | 634.033 | 136.125 | XMGQYMWWDQXJHM-UHFFFAOYSA-N  | CHEMONTID:0001549 |
| 62832  | Ethyl isohexanoate                        | C8H16O2 |  | 637.234 | 99.08   |                              |                   |
| 59772  | Isobutyl isovalerate                      | C9H18O2 |  | 637.721 | 60.021  |                              |                   |
| 9573   | 3-Methylbutyl isobutanoate                | C9H18O2 |  | 643.234 | 115.075 |                              |                   |
| 41671  | 2-Methylbutyl isobutanoate                | C9H18O2 |  | 646.822 | 129.091 |                              |                   |
| 72661  | beta-Phellandrene                         | C10H16  |  | 649.56  | 136.125 | LFJQCDVYDGGFCH-UHFFFAOYSA-N  | CHEMONTID:0001549 |
| 35299  | (2R,5S)-2-Methyl-5-isopropenyl-2-vinylTHF | C10H16O |  | 666.324 | 68.062  |                              |                   |
| 25402  | 2-Methyl-1-Butanol                        | C5H12O  |  | 669.774 | 59.049  | QPRQEDXDYOZYLA-UHFFFAOYSA-N  | CHEMONTID:0000129 |
| 21983  | 3-Methyl-1-Butanol                        | C5H12O  |  | 672.949 | 46.041  | PHTQWCKDNZKARW-UHFFFAOYSA-N  | CHEMONTID:0000129 |
| 27851  | Methyl thioisopentanoate                  | C6H12OS |  | 692.926 | 132.06  |                              |                   |
| 54840  | 2-Pentylfuran                             | C9H14O  |  | 708.015 | 138.104 | YVBAUDVGOF CUSG-UHFFFAOYSA-N |                   |
| 28366  | Butyl 2-methylbutanoate                   | C9H18O2 |  | 708.84  | 85.065  |                              |                   |
| 62769  | Ethyl hexanoate                           | C8H16O2 |  | 715.052 | 88.052  |                              |                   |
| 56662  | Ethyl tiglate                             | C7H12O2 |  | 718.391 | 113.06  |                              |                   |
| 72839  | gamma-Terpinene                           | C10H16  |  | 722.591 | 136.125 | YKFLAYDHMOASIY-UHFFFAOYSA-N  | CHEMONTID:0004622 |
| 35300  | (2R,5R)-2-Methyl-5-isopropenyl-2-vinylTHF | C10H16O |  | 724.916 | 68.062  |                              |                   |

|        |                                    |          |  |         |         |                              |                   |
|--------|------------------------------------|----------|--|---------|---------|------------------------------|-------------------|
| 24821  | Pentyl propanoate                  | C8H16O2  |  | 725.503 | 75.044  |                              |                   |
| 9622   | Pentyl isobutanoate                | C9H18O2  |  | 731.692 | 89.06   |                              |                   |
| 59849  | Thiazole                           | C3H3NS   |  | 738.679 | 84.998  | FZWLAAWBMGSTSO-UHFFFAOYSA-N  | CHEMONTID:0000095 |
| 59773  | Butyl 3-methylbutanoate            | C9H18O2  |  | 740.604 | 60.021  |                              |                   |
| 72375  | (3E)-3,7-Dimethyl-1,3,6-octatriene | C10H16   |  | 743.042 | 136.125 | IHPKGUQCSIINRJ-CSKARUKUSA-N  | CHEMONTID:0001549 |
| 5084   | 1-Pentanol                         | C5H12O   |  | 745.33  | 70.078  | AMQJEAYHLZJPGS-UHFFFAOYSA-N  | CHEMONTID:0000129 |
| 8527   | 3-Octanone                         | C8H16O   |  | 747.518 | 128.12  | RHLVCLIPMVJYKS-UHFFFAOYSA-N  | CHEMONTID:0001831 |
| 84492  | Styrene                            | C8H8     |  | 750.93  | 104.062 | PPBRXRYQALVLMV-UHFFFAOYSA-N  | CHEMONTID:0000037 |
| 73751  | Methylpyrazine                     | C5H6N2   |  | 763.394 | 94.053  | CAWHJQAVHZEVTJ-UHFFFAOYSA-N  | CHEMONTID:0000067 |
| 9895   | 2-Methyltetrahydrofuran-3-one      | C5H8O2   |  | 766.094 | 100.052 | FCWYQRVIQDNGBI-UHFFFAOYSA-N  | CHEMONTID:0001982 |
| 109426 | p-Cymene                           | C10H14   |  | 768.857 | 134.109 | HFPZCAJZSCWRBC-UHFFFAOYSA-N  | CHEMONTID:0001549 |
| 41664  | Isoamyl butanoate                  | C9H18O2  |  | 769.145 | 71.049  |                              |                   |
| 8084   | n-Hexyl acetate                    | C8H16O2  |  | 782.933 | 61.028  |                              |                   |
| 73151  | alpha-Terpinolene                  | C10H16   |  | 787.721 | 136.125 | MOYAFQVGZZPNRA-UHFFFAOYSA-N  | CHEMONTID:0001549 |
| 40441  | 3-Methylbutyl 2-methylbutanoate    | C10H20O2 |  | 789.358 | 129.091 |                              |                   |
| 40466  | 2-Methylbutyl 2-methylbutanoate    | C10H20O2 |  | 793.334 | 143.107 |                              |                   |
| 8621   | 2-Octanone                         | C8H16O   |  | 801.622 | 128.12  | ZPVFWPFBNIEHGJ-UHFFFAOYSA-N  | CHEMONTID:0001831 |
| 40655  | 3-Methylbutyl 3-methylbutanoate    | C10H20O2 |  | 821.174 | 129.091 |                              |                   |
| 40657  | 2-Methylbutyl 3-methylbutanoate    | C10H20O2 |  | 822.761 | 143.107 |                              |                   |
| 55723  | 2,2,6-Trimethylcyclohexanone       | C9H16O   |  | 844.538 | 140.12  | ZPVOLGVTNLDBFI-UHFFFAOYSA-N  | CHEMONTID:0001831 |
| 5489   | 2,5-Dimethylpyrazine               | C6H8N2   |  | 857.414 | 108.068 | LCZUOKDVTBMCMX-UHFFFAOYSA-N  | CHEMONTID:0000067 |
| 11466  | Propyl hexanoate                   | C9H18O2  |  | 860.489 | 99.08   |                              |                   |
| 92497  | 2,6-Dimethylpyrazine               | C6H8N2   |  | 867.928 | 108.068 | HJFZAYHYIWGLNL-UHFFFAOYSA-N  | CHEMONTID:0000067 |
| 83674  | Pentyl 2-methylbutanoate           | C10H20O2 |  | 875.928 | 103.075 |                              |                   |
| 88496  | 1,2,3-Trimethylbenzene             | C9H12    |  | 881.041 | 120.093 | FYGHSUNMUKGBRK-UHFFFAOYSA-N  |                   |
| 62796  | Ethyl heptanoate                   | C9H18O2  |  | 886.666 | 88.052  |                              |                   |
| 6655   | Sulcatone                          | C8H14O   |  | 892.18  | 126.104 | UHEPJGULSIKKTU-UHFFFAOYSA-N  | CHEMONTID:0001831 |
| 26732  | Hexyl propanoate                   | C9H18O2  |  | 895.392 | 75.044  |                              |                   |
| 10956  | Hexyl isobutanoate                 | C10H20O2 |  | 900.505 | 89.06   |                              |                   |
| 18170  | Ethyl lactate                      | C5H10O3  |  | 904.118 | 45.033  |                              |                   |
| 10666  | Pentyl 3-methylbutanoate           | C10H20O2 |  | 907.356 | 103.075 |                              |                   |
| 137583 | Rose oxide                         | C10H18O  |  | 910.331 | 139.112 |                              |                   |
| 55542  | 2-Cyclopenten-1-one                | C5H6O    |  | 915.306 | 82.041  | BZKFMUIJRXXWWQK-UHFFFAOYSA-N | CHEMONTID:0001831 |
| 79058  | Isobutyl hexanoate                 | C10H20O2 |  | 917.894 | 99.08   |                              |                   |
| 23911  | 1-Hexanol                          | C6H14O   |  | 918.907 | 56.062  | ZSIAUFGUXNUGDI-UHFFFAOYSA-N  | CHEMONTID:0001334 |

|        |                            |          |  |          |         |                             |                   |
|--------|----------------------------|----------|--|----------|---------|-----------------------------|-------------------|
| 137588 | trans-Rose oxide           | C10H18O  |  | 932.72   | 139.112 |                             |                   |
| 120606 | Dimethyl trisulfide        | C2H6S3   |  | 952.584  | 125.963 |                             |                   |
| 9259   | n-Heptyl acetate           | C9H18O2  |  | 952.671  | 61.028  |                             |                   |
| 8622   | 2-Nonanone                 | C9H18O   |  | 976.123  | 142.135 | VKCYHJWLYTUGCC-UHFFFAOYSA-N | CHEMONTID:0001831 |
| 53225  | (E,E)-1,3,5-Undecatriene   | C11H18   |  | 983.174  | 150.14  | JQQDKNVOSLONRS-JEGFTUTRSA-N | CHEMONTID:0002838 |
| 25252  | Nonanal                    | C9H18O   |  | 983.437  | 98.109  | GYHFUZHODSMOHU-UHFFFAOYSA-N | CHEMONTID:0001831 |
| 32467  | 3-Octanol                  | C8H18O   |  | 986.649  | 59.049  | NMRPBPVERJPACX-UHFFFAOYSA-N | CHEMONTID:0001334 |
| 5576   | Trimethylpyrazine          | C7H10N2  |  | 991.037  | 122.084 | IAEGWXHKWJGQAZ-UHFFFAOYSA-N | CHEMONTID:0000067 |
| 53227  | (3E,5Z)-1,3,5-Undecatriene | C11H18   |  | 1001.905 | 150.14  | JQQDKNVOSLONRS-STRRHFTISA-N | CHEMONTID:0002838 |
| 53222  | (3Z,5E)-1,3,5-Undecatriene | C11H18   |  | 1009.355 | 150.14  | JQQDKNVOSLONRS-BABZSUFTSA-N | CHEMONTID:0002838 |
| 38190  | Perillene                  | C10H14O  |  | 1026.33  | 150.104 | XNGKCOFXDHYSGR-UHFFFAOYSA-N |                   |
| 109433 | 1,2,3,5-Tetramethylbenzene | C10H14   |  | 1027.08  | 134.109 | BFIMMTCNYPIMRN-UHFFFAOYSA-N |                   |
| 18456  | 2-Octanol                  | C8H18O   |  | 1028.305 | 45.033  | SJWFXCIHNDVPSH-UHFFFAOYSA-N | CHEMONTID:0001334 |
| 83671  | Hexyl 2-methylbutanoate    | C11H22O2 |  | 1038.105 | 103.075 |                             |                   |
| 109435 | 1,2,4,5-Tetramethylbenzene | C10H14   |  | 1042.83  | 134.109 | SQNZJJAZBFDUTD-UHFFFAOYSA-N |                   |
| 106316 | p-Cymenene                 | C10H12   |  | 1049.943 | 132.093 | MMSLOZQEMPDGPI-UHFFFAOYSA-N | CHEMONTID:0000045 |
| 63199  | Ethyl octanoate            | C10H20O2 |  | 1057.993 | 88.052  |                             |                   |
| 27623  | Heptyl propanoate          | C10H20O2 |  | 1060.968 | 75.044  |                             |                   |
| 10958  | Heptyl isobutanoate        | C11H22O2 |  | 1063.155 | 89.06   |                             |                   |
| 60199  | Hexyl 3-methylbutanoate    | C11H22O2 |  | 1067.155 | 103.075 |                             |                   |
| 67180  | Cosmene                    | C10H14   |  | 1070.868 | 134.109 | HPZWSJQQCJZBBG-LQPGMRMSMA-N | CHEMONTID:0002838 |
| 26298  | 1-Octen-3-ol               | C8H16O   |  | 1076.218 | 72.057  | VSMOENVRABVKN-UHFFFAOYSA-N  | CHEMONTID:0001334 |
| 23984  | Isobutyl heptanoate        | C11H22O2 |  | 1077.418 | 113.096 |                             |                   |
| 40406  | 1-Heptanol                 | C7H16O   |  | 1081.568 | 70.078  | BBMCTIGTTCKYKF-UHFFFAOYSA-N | CHEMONTID:0001334 |
| 40217  | 3-Methylbutyl hexanoate    | C11H22O2 |  | 1087.543 | 143.107 |                             |                   |
| 10837  | 2-Nonyl acetate            | C11H22O2 |  | 1092.718 | 87.044  |                             |                   |
| 7393   | Acetic acid                | C2H4O2   |  | 1097.068 | 60.021  |                             |                   |
| 76294  | Furfural                   | C5H4O2   |  | 1099.93  | 96.021  | HYBBIBNJHNGZAN-UHFFFAOYSA-N | CHEMONTID:0001831 |
| 20404  | Tetramethylpyrazine        | C8H12N2  |  | 1101.255 | 136.099 | FINHMKGKINIASC-UHFFFAOYSA-N | CHEMONTID:0000067 |
| 36123  | Nerol oxide                | C10H16O  |  | 1101.48  | 152.12  |                             |                   |
| 40372  | Isoamyl tiglate            | C10H18O2 |  | 1102.18  | 101.06  |                             |                   |
| 9257   | n-Octyl acetate            | C10H20O2 |  | 1113.543 | 61.028  |                             |                   |
| 109428 | 1,2,3,4-Tetramethylbenzene | C10H14   |  | 1125.378 | 134.109 | UOHMMEJUHBCKEE-UHFFFAOYSA-N |                   |
| 165417 | Copaene                    | C15H24   |  | 1125.953 | 204.187 | VLXDPFLIRFYIME-BTFPBAQTSAN  | CHEMONTID:0001550 |
| 30326  | 2-Decanone                 | C10H20O  |  | 1139.465 | 156.151 | ZAJNGDIORYACQU-UHFFFAOYSA-N | CHEMONTID:0001831 |

|        |                                |          |  |          |         |                              |                   |
|--------|--------------------------------|----------|--|----------|---------|------------------------------|-------------------|
| 106758 | Benzofuran                     | C8H6O    |  | 1156.628 | 118.041 | IANQTJJSKSUMEQM-UHFFFAOYSA-N |                   |
| 75219  | 2-Acetylfuran                  | C6H6O2   |  | 1158.953 | 110.036 | IEMMBWWQXVXBEU-UHFFFAOYSA-N  | CHEMONTID:0001831 |
| 151708 | Ethyl-trimethylpyrazine        | C9H14N2  |  | 1162.003 | 149.107 |                              |                   |
| 13358  | Propyl octanoate               | C11H22O2 |  | 1179.14  | 145.122 |                              |                   |
| 18659  | 2-Nonanol                      | C9H20O   |  | 1180.39  | 69.07   | NGDNVOAEIVQRFH-UHFFFAOYSA-N  | CHEMONTID:0001334 |
| 51446  | Benzaldehyde                   | C7H6O    |  | 1182.978 | 106.041 | HUMNYLRZRPPJDN-UHFFFAOYSA-N  | CHEMONTID:0000321 |
| 33622  | 2-Methylthiolan-3-one          | C5H8OS   |  | 1188.24  | 116.029 | YMZZPMVKABUEBL-UHFFFAOYSA-N  |                   |
| 33887  | 2-Methylthioethanol            | C3H8OS   |  | 1191.903 | 61.011  | WBBPRCNXBQTYLF-UHFFFAOYSA-N  | CHEMONTID:0003862 |
| 63202  | Ethyl nonanoate                | C11H22O2 |  | 1205.078 | 88.052  |                              |                   |
| 10959  | Octyl isobutanoate             | C12H24O2 |  | 1214.053 | 89.06   |                              |                   |
| 163632 | Ionene                         | C13H18   |  | 1221.19  | 174.14  | LTMQZVLXCLQPCT-UHFFFAOYSA-N  |                   |
| 42410  | Linalool                       | C10H18O  |  | 1224.615 | 71.049  | CDOSHBSSFJOMGT-UHFFFAOYSA-N  | CHEMONTID:0001549 |
| 26870  | Isobutyl octanoate             | C12H24O2 |  | 1229.403 | 145.122 |                              |                   |
| 24040  | 1-Octanol                      | C8H18O   |  | 1235.665 | 84.093  | KBPLFHGFOOTCA-UHFFFAOYSA-N   | CHEMONTID:0001334 |
| 40186  | 3-Methylbutyl heptanoate       | C12H24O2 |  | 1237.14  | 113.096 |                              |                   |
| 34200  | Dimethyl sulfoxide             | C2H6OS   |  | 1244.74  | 62.99   |                              |                   |
| 36883  | Methyl citronellate            | C11H20O2 |  | 1245.59  | 152.12  |                              |                   |
| 48881  | Ethyl 3-(methylthio)propanoate | C6H12O2S |  | 1249.075 | 148.055 |                              |                   |
| 95439  | 5-Methylfurfural               | C6H6O2   |  | 1260.663 | 110.036 | OUDFNZMQXZILJD-UHFFFAOYSA-N  | CHEMONTID:0001831 |
| 75361  | 2-Propanoylfuran               | C7H8O2   |  | 1262.875 | 124.052 | HCPORNAVHSWTOJ-UHFFFAOYSA-N  | CHEMONTID:0001831 |
| 6713   | Isobutanoic acid               | C4H8O2   |  | 1263.913 | 73.028  |                              |                   |
| 54756  | Fenchol                        | C10H18O  |  | 1270.713 | 80.062  | IAIHUHQCLTYTSF-UHFFFAOYSA-N  | CHEMONTID:0001549 |
| 76037  | 4-Cyclopentene-1,3-dione       | C5H4O2   |  | 1278.125 | 96.021  | MCFZBCCYOPSZLG-UHFFFAOYSA-N  | CHEMONTID:0001831 |
| 73222  | Caryophyllene                  | C15H24   |  | 1281.025 | 204.187 | NPNUFJAVOONJE-GFUGXAQUSA-N   | CHEMONTID:0001550 |
| 126716 | 2-Methylbenzofuran             | C9H8O    |  | 1286.6   | 132.057 | GBGPVUAOTCNZPT-UHFFFAOYSA-N  |                   |
| 30303  | 2-Undecanone                   | C11H22O  |  | 1295.1   | 170.167 | KYWIYKKSMDLRDC-UHFFFAOYSA-N  | CHEMONTID:0001831 |
| 94270  | 2-Acetyl-5-methylfuran         | C7H8O2   |  | 1300.338 | 124.052 | KEFJLCGVTHRGAAH-UHFFFAOYSA-N | CHEMONTID:0001831 |
| 76974  | 5,5-Dimethylfuran-2-one        | C6H8O2   |  | 1307.975 | 97.028  |                              |                   |
| 32290  | Myrcenol                       | C10H18O  |  | 1315.4   | 59.049  | DUNCVNHORHNONW-UHFFFAOYSA-N  | CHEMONTID:0000129 |
| 94074  | N-Methyl-2-formylpyrrole       | C6H7NO   |  | 1324.525 | 108.044 | OUKQTRFCDKSEPL-UHFFFAOYSA-N  | CHEMONTID:0001831 |
| 18283  | 2-Decanol                      | C10H22O  |  | 1325.438 | 69.07   | ACUZDYFTRHEKOS-UHFFFAOYSA-N  | CHEMONTID:0001334 |
| 63144  | Ethyl decanoate                | C12H24O2 |  | 1355.813 | 88.052  |                              |                   |
| 66028  | Benzeneacetaldehyde            | C8H8O    |  | 1358.175 | 120.057 | DTUQWGWMIHBEK-UHFFFAOYSA-N   | CHEMONTID:0001257 |
| 40694  | Pinocarveol                    | C10H16O  |  | 1369.175 | 92.062  | LCYXQUJDODZYIJ-UHFFFAOYSA-N  | CHEMONTID:0001549 |
| 33774  | 2,3,5-Trithiahexane            | C3H8S3   |  | 1377.71  | 139.978 | MYIOBINSHMEDEY-UHFFFAOYSA-N  | CHEMONTID:0004089 |



|        |                           |          |  |          |         |                             |                   |
|--------|---------------------------|----------|--|----------|---------|-----------------------------|-------------------|
| 40875  | 3-Methylbutyl octanoate   | C13H26O2 |  | 1379.773 | 171.138 |                             |                   |
| 24075  | 1-Nonanol                 | C9H20O   |  | 1381.135 | 98.109  | ZWRUINPWMLAQRD-UHFFFAOYSA-N | CHEMONTID:0001334 |
| 72752  | Humulene                  | C15H24   |  | 1384.21  | 204.187 | FAMPSKZZVDUYOS-HRGUGZIWSA-N | CHEMONTID:0001550 |
| 77694  | 2-Hydroxymethylfuran      | C5H6O2   |  | 1386.36  | 98.036  | XPFVYQJUAUNWIW-UHFFFAOYSA-N |                   |
| 86753  | Ethyl benzoate            | C9H10O2  |  | 1387.973 | 150.068 |                             |                   |
| 63265  | Ethyl (4E)-4-decenoate    | C12H22O2 |  | 1391.16  | 88.052  |                             |                   |
| 3748   | (6E)-beta-Farnesene       | C15H24   |  | 1391.16  | 120.093 | JSNRRGGBADWTMC-NTCAYCPXSA-N | CHEMONTID:0001550 |
| 33424  | 3-Methylbutanoic acid     | C5H10O2  |  | 1405.023 | 60.021  |                             |                   |
| 48854  | 2-Methylbutanoic acid     | C5H10O2  |  | 1405.485 | 74.036  |                             |                   |
| 80925  | Diethyl succinate         | C8H14O4  |  | 1405.823 | 101.023 |                             |                   |
| 516    | Ethyl (4Z)-4-decenoate    | C12H22O2 |  | 1415.998 | 88.052  |                             |                   |
| 62894  | Ethyl 9-decenoate         | C12H22O2 |  | 1425.373 | 88.052  |                             |                   |
| 37225  | Methyl trans-Geranate     | C11H18O2 |  | 1430.673 | 182.13  |                             |                   |
| 32871  | alpha-Terpineol           | C10H18O  |  | 1431.948 | 136.125 | WUOACPNHFRMFPN-UHFFFAOYSA-N | CHEMONTID:0001549 |
| 59355  | gamma-Hexalactone         | C6H10O2  |  | 1435.898 | 85.028  | JBFHTYHTHYHCDJ-UHFFFAOYSA-N | CHEMONTID:0001245 |
| 30304  | 2-Dodecanone              | C12H24O  |  | 1440.298 | 184.182 | LSKONYRONEBKA-UHFFFAOYSA-N  | CHEMONTID:0001831 |
| 90113  | 3-(Methylthio)-1-propanol | C4H10OS  |  | 1457.248 | 106.045 | CZUGFKJYCPYHHV-UHFFFAOYSA-N | CHEMONTID:0003862 |
| 18837  | 2-Undecanol               | C11H24O  |  | 1463.773 | 69.07   | XMUJIPOFTAHSOK-UHFFFAOYSA-N | CHEMONTID:0001334 |
| 53701  | Dimethyl tetrasulfide     | C2H6S4   |  | 1486.243 | 157.935 |                             |                   |
| 161112 | Dehydroionene             | C13H16   |  | 1489.585 | 172.125 | ACFCPKXNISJKZ-RMKNXTFCSA-N  | CHEMONTID:0004622 |
| 63168  | Ethyl undecanoate         | C13H26O2 |  | 1490.498 | 88.052  |                             |                   |
| 33540  | Pentanoic acid            | C5H10O2  |  | 1497.098 | 60.021  |                             |                   |
| 165549 | delta-Cadinene            | C15H24   |  | 1505.595 | 204.187 | FUCYIEXQVQJBKY-ZFWWWQNUSA-N | CHEMONTID:0001550 |
| 24197  | Isobutyl decanoate        | C14H28O2 |  | 1509.508 | 173.154 |                             |                   |
| 40559  | 3-Methylbutyl nonanoate   | C14H28O2 |  | 1515.758 | 141.127 |                             |                   |
| 68292  | Methyl 2-phenylacetate    | C9H10O2  |  | 1516.258 | 150.068 |                             |                   |
| 40357  | 1-Decanol                 | C10H22O  |  | 1518.608 | 112.125 | MWKFXSUHUHTGQN-UHFFFAOYSA-N | CHEMONTID:0001334 |
| 36951  | Citronellol               | C10H20O  |  | 1524.283 | 156.151 | QMVPMAAFGQKVCJ-UHFFFAOYSA-N | CHEMONTID:0001549 |
| 109391 | Curcumene                 | C15H22   |  | 1530.683 | 202.172 | VMYXUZSZMNBRCN-UHFFFAOYSA-N | CHEMONTID:0001550 |
| 110823 | Methyl salicylate         | C8H8O3   |  | 1532.908 | 152.047 |                             |                   |
| 109177 | (1S,4S,4aR)-Cubenene      | C15H24   |  | 1536.595 | 204.187 |                             |                   |
| 65175  | Ethyl 2-phenylacetate     | C10H12O2 |  | 1549.908 | 164.083 |                             |                   |
| 109157 | Cubenene diastereomer     | C15H24   |  | 1549.97  | 204.187 |                             |                   |
| 38458  | Neryl propanoate          | C13H22O2 |  | 1552.258 | 154.135 |                             |                   |
| 53368  | Myrtenol                  | C10H16O  |  | 1554.958 | 108.057 | RXBQNMWIKKOSCS-UHFFFAOYSA-N | CHEMONTID:0001549 |

|        |                                              |          |  |          |         |                              |                   |
|--------|----------------------------------------------|----------|--|----------|---------|------------------------------|-------------------|
| 59357  | gamma-Heptalactone                           | C7H12O2  |  | 1562.908 | 85.028  | VLSVVMPLPMNWBH-UHFFFAOYSA-N  | CHEMONTID:0001245 |
| 37118  | Nerol                                        | C10H18O  |  | 1567.645 | 154.135 | GLZPCOQZEFWAFX-YFHOOESVSA-N  | CHEMONTID:0001549 |
| 30310  | 2-Tridecanone                                | C13H26O  |  | 1579.095 | 198.198 | CYIFVRUOHKNECG-UHFFFAOYSA-N  | CHEMONTID:0001831 |
| 84130  | 2-Phenylethyl acetate                        | C10H12O2 |  | 1587.67  | 104.062 |                              |                   |
| 38999  | Damascenone                                  | C13H18O  |  | 1590.745 | 190.135 | POIARNZEYGURDG-FNORWQNLSA-N  | CHEMONTID:0001831 |
| 37833  | Geranyl propanoate                           | C13H22O2 |  | 1592.258 | 136.125 |                              |                   |
| 18221  | 2-Dodecanol                                  | C12H26O  |  | 1594.345 | 45.033  | XSWSEQPWKOWORN-UHFFFAOYSA-N  | CHEMONTID:0001334 |
| 161108 | (1E)-1-(2,3,6-Trimethylphenyl)buta-1,3-diene | C13H16   |  | 1600.92  | 172.125 |                              |                   |
| 163395 | trans-Calamenene                             | C15H22   |  | 1601.498 | 159.117 | PGTJIOWQJWHTJJ-QWHCGFSZSA-N  | CHEMONTID:0001550 |
| 163396 | cis-Calamenene                               | C15H22   |  | 1603.733 | 159.117 | PGTJIOWQJWHTJJ-STQMWFEEESA-N | CHEMONTID:0001550 |
| 63153  | Ethyl dodecanoate                            | C14H28O2 |  | 1623.755 | 88.052  |                              |                   |
| 36965  | Geraniol                                     | C10H18O  |  | 1628.968 | 154.135 | GLZPCOQZEFWAFX-JXMROGBWSA-N  | CHEMONTID:0001549 |
| 33536  | Hexanoic acid                                | C6H12O2  |  | 1634.18  | 60.021  |                              |                   |
| 145358 | 3-Phenylfuran                                | C10H8O   |  | 1636.818 | 144.057 | BNANPEQZOWHZKY-UHFFFAOYSA-N  |                   |
| 94281  | 2-Methoxyphenol                              | C7H8O2   |  | 1646.13  | 124.052 | LHGVFZTZFXWLCP-UHFFFAOYSA-N  | CHEMONTID:0000190 |
| 40558  | 3-Methylbutyl decanoate                      | C15H30O2 |  | 1646.855 | 199.169 |                              |                   |
| 21717  | 1-Undecanol                                  | C11H24O  |  | 1649.955 | 126.14  | KJIOQYGWTQBHNH-UHFFFAOYSA-N  | CHEMONTID:0001334 |
| 166520 | Safrole                                      | C10H10O2 |  | 1660.83  | 162.068 | ZMQAAUBTXCXRIC-UHFFFAOYSA-N  |                   |
| 53588  | Benzyl Alcohol                               | C7H8O    |  | 1665.543 | 108.057 |                              |                   |
| 177873 | Epoxycalamenene                              | C15H20O  |  | 1668.38  | 173.096 |                              |                   |
| 84137  | 2-Phenylethyl isobutanoate                   | C12H16O2 |  | 1668.505 | 104.062 |                              |                   |
| 84437  | Ethyl 3-phenylpropanoate                     | C11H14O2 |  | 1673.93  | 178.099 |                              |                   |
| 161391 | Dehydrohimachalene                           | C15H20   |  | 1692.918 | 200.156 |                              |                   |
| 161103 | alpha-Calacorene                             | C15H20   |  | 1707.193 | 200.156 | CUUMXRBKJIDIAY-ZDUSSCGKSA-N  | CHEMONTID:0001550 |
| 65943  | Phenylethyl alcohol                          | C8H10O   |  | 1708.993 | 122.073 |                              |                   |
| 30307  | 2-Tetradecanone                              | C14H28O  |  | 1711.443 | 212.213 | POQLVOYRGNFGRM-UHFFFAOYSA-N  | CHEMONTID:0001831 |
| 59356  | gamma-Octalactone                            | C8H14O2  |  | 1712.343 | 85.028  | IPBFYZQJXZJBFQ-UHFFFAOYSA-N  | CHEMONTID:0001245 |
| 18319  | 2-Tridecanol                                 | C13H28O  |  | 1719.605 | 45.033  | HKOLRKVMHVYNGG-UHFFFAOYSA-N  | CHEMONTID:0001334 |
| 42203  | 4-Methylhexanoic acid                        | C7H14O2  |  | 1732.893 | 60.021  |                              |                   |
| 181204 | trans-beta-Ionone                            | C13H20O  |  | 1736.13  | 177.127 | PSQYTAPXSHCGMF-BQYQJAHWSA-N  | CHEMONTID:0001550 |
| 99474  | 2-Hydroxymethylthiophene                     | C5H6OS   |  | 1748.778 | 114.013 | ZPHGMBGIFODUMF-UHFFFAOYSA-N  |                   |
| 62801  | Ethyl tridecanoate                           | C15H30O2 |  | 1749.39  | 88.052  |                              |                   |
| 161104 | beta-Calacorene                              | C15H20   |  | 1759.753 | 200.156 | KFYISTOZYAKAPV-UHFFFAOYSA-N  | CHEMONTID:0001550 |
| 45535  | 2-Ethylhexanoic acid                         | C8H16O2  |  | 1759.69  | 88.052  |                              |                   |
| 33537  | Heptanoic acid                               | C7H14O2  |  | 1764.803 | 60.021  |                              |                   |

|        |                             |          |  |          |         |                             |                   |
|--------|-----------------------------|----------|--|----------|---------|-----------------------------|-------------------|
| 84193  | 2-Phenylethyl isopentanoate | C13H18O2 |  | 1769.553 | 104.062 |                             |                   |
| 120738 | Maltol                      | C6H6O3   |  | 1769.803 | 126.031 | XPCTZQVDEJYUGT-UHFFFAOYSA-N | CHEMONTID:0000481 |
| 21317  | 1-Dodecanol                 | C12H26O  |  | 1774.978 | 140.156 | LQZZUXJYWNFBMV-UHFFFAOYSA-N | CHEMONTID:0001334 |
| 74075  | 2-Acetylpyrrole             | C6H7NO   |  | 1780.778 | 109.052 | IGJQUJNPMOYEJY-UHFFFAOYSA-N | CHEMONTID:0001831 |
| 6735   | Caryophyllene oxide         | C15H24O  |  | 1784.03  | 187.148 |                             |                   |
| 67176  | 2-Phenyl-1-butanol          | C10H14O  |  | 1794.303 | 150.104 | DNHNBMQCHKKDNI-UHFFFAOYSA-N | CHEMONTID:0002811 |
| 36815  | Z-Nerolidol                 | C15H26O  |  | 1806.878 | 136.125 |                             |                   |
| 160431 | 1,6-Dimethylnaphthalene     | C12H12   |  | 1807.203 | 156.093 | CBMXCNPQDUJNHT-UHFFFAOYSA-N |                   |
| 36255  | Perillol                    | C10H16O  |  | 1817.74  | 152.12  | NDTYTMIUWGWIMO-UHFFFAOYSA-N | CHEMONTID:0001549 |
| 141556 | Guajen                      | C12H12   |  | 1818.09  | 156.093 | WWGUMAYGTYQSGA-UHFFFAOYSA-N |                   |
| 72763  | Humulene epoxide I          | C15H24O  |  | 1823.328 | 220.182 |                             |                   |
| 73738  | Phenol                      | C6H6O    |  | 1827.74  | 94.041  | ISWSIDIOOBJBQZ-UHFFFAOYSA-N | CHEMONTID:0004647 |
| 30617  | 2-Pentadecanone             | C15H30O  |  | 1836.978 | 226.229 | CJPNOLIZCWDHJK-UHFFFAOYSA-N | CHEMONTID:0001831 |
| 18328  | 2-Tetradecanol              | C14H30O  |  | 1840.315 | 45.033  | BRGJIIMZXMMCC-UHFFFAOYSA-N  | CHEMONTID:0001334 |
| 75061  | 2-Formylpyrrole             | C5H5NO   |  | 1844.915 | 95.037  | ZSKGQVFRTSEPJT-UHFFFAOYSA-N | CHEMONTID:0001831 |
| 59349  | gamma-Nonalactone           | C9H16O2  |  | 1846.29  | 85.028  | OALYTRUKMRCXNH-UHFFFAOYSA-N | CHEMONTID:0001245 |
| 8547   | Furaneol                    | C6H8O3   |  | 1854.328 | 128.047 | INAXVXBKKUCGI-UHFFFAOYSA-N  | CHEMONTID:0001982 |
| 37123  | E-Nerolidol                 | C15H26O  |  | 1862.553 | 136.125 |                             |                   |
| 63166  | Ethyl tetradecanoate        | C16H32O2 |  | 1871.328 | 88.052  |                             |                   |
| 109644 | Epicubenol                  | C15H26O  |  | 1875.688 | 161.132 | COGPRPSWSKLTQF-QPSCCSFWSA-N | CHEMONTID:0001550 |
| 189958 | alpha-Corocalene            | C15H20   |  | 1881.613 | 200.156 | VTUZIFHLLUSULC-UHFFFAOYSA-N | CHEMONTID:0001550 |
| 109639 | Diepicubenol                | C15H26O  |  | 1882.375 | 161.132 |                             |                   |
| 33546  | Octanoic acid               | C8H16O2  |  | 1890.588 | 60.021  |                             |                   |
| 40221  | Isoamyl laurate             | C17H34O2 |  | 1892.875 | 183.174 |                             |                   |
| 132467 | Cuminol                     | C10H14O  |  | 1931.163 | 150.104 | OIGWAXDAPKFNQC-UHFFFAOYSA-N | CHEMONTID:0001549 |
| 30616  | 2-Hexadecanone              | C16H32O  |  | 1957.288 | 240.245 | XCXKZBWAKKPFJC-UHFFFAOYSA-N | CHEMONTID:0001831 |
| 126603 | Ethyl cinnamate             | C11H12O2 |  | 1962.613 | 176.083 |                             |                   |
| 54282  | Neointermedeol              | C15H26O  |  | 1966.363 | 222.198 | DPQYOKVMVCQHMY-TUVASFSCSA-N | CHEMONTID:0001550 |
| 59347  | gamma-Decalactone           | C10H18O2 |  | 1977.838 | 85.028  | IFYYFLINQYPWGJ-UHFFFAOYSA-N | CHEMONTID:0001245 |
| 63165  | Ethyl pentadecanoate        | C17H34O2 |  | 1986.713 | 88.052  |                             |                   |
| 165009 | tau-Cadinol                 | C15H26O  |  | 2003.523 | 161.132 | LHYHMMRYTDARSZ-XQLPTFJDSA-N | CHEMONTID:0001550 |
| 84567  | 2-Phenylethyl hexanoate     | C14H20O2 |  | 2004.485 | 104.062 |                             |                   |
| 33554  | Nonanoic acid               | C9H18O2  |  | 2008.635 | 60.021  |                             |                   |
| 7822   | 1-Tetradecanol              | C14H28O  |  | 2009.735 | 168.187 | HLZKNKRTKFSKGZ-UHFFFAOYSA-N | CHEMONTID:0001334 |
| 75317  | tau-Muurolol                | C15H26O  |  | 2019.673 | 204.187 |                             |                   |

|        |                         |          |  |          |         |                              |                   |
|--------|-------------------------|----------|--|----------|---------|------------------------------|-------------------|
| 165024 | delta-Cadinol           | C15H26O  |  | 2032.023 | 161.132 | LHYHMMRYTDARSZ-ZQDZILKHS-A-N | CHEMONTID:0001550 |
| 132478 | 4-Vinyl-2-methoxyphenol | C9H10O2  |  | 2036.023 | 150.068 | YOMSJEATGXXYPX-UHFFFAOYSA-N  | CHEMONTID:0000190 |
| 111126 | 2-Acetylaniline         | C8H9NO   |  | 2054.673 | 120.044 | GTDQGKWDWVUKTI-UHFFFAOYSA-N  | CHEMONTID:0001831 |
| 187944 | Cadalene                | C15H18   |  | 2055.073 | 198.14  | VMOJIHDTVZTGDO-UHFFFAOYSA-N  | CHEMONTID:0001550 |
| 75316  | alpha-Cadinol           | C15H26O  |  | 2062.548 | 222.198 | LHYHMMRYTDARSZ-BYNSBNAKSA-N  | CHEMONTID:0001550 |
| 30615  | 2-Heptadecanone         | C17H34O  |  | 2065.248 | 254.26  | TVTCXPXLRKTHAU-UHFFFAOYSA-N  | CHEMONTID:0001831 |
| 63170  | Ethyl hexadecanoate     | C18H36O2 |  | 2086.123 | 88.052  |                              |                   |
| 59352  | gamma-Undecalactone     | C11H20O2 |  | 2090.323 | 85.028  | PHXATPHONSXBIL-UHFFFAOYSA-N  | CHEMONTID:0001245 |
| 196879 | Myristicin              | C11H12O3 |  | 2095.26  | 192.078 | BNWJOHGLIBDBOB-UHFFFAOYSA-N  |                   |
| 7302   | Pyranone                | C6H8O4   |  | 2098.798 | 144.042 | ZPSJGADGUYRKE-UHFFFAOYSA-N   | CHEMONTID:0000481 |
| 33538  | n-Decanoic acid         | C10H20O2 |  | 2105.948 | 60.021  |                              |                   |
| 191449 | Diphenyl sulfide        | C12H10S  |  | 2124.658 | 186.05  |                              |                   |
| 9532   | (2Z)-8-Hydroxylinalool  | C10H18O2 |  | 2133.945 | 71.049  |                              |                   |
| 3725   | (2Z,6E)-Farnesol        | C15H26O  |  | 2134.895 | 69.07   | CRDAMVZIKSXKFV-PVMFERMNSA-N  | CHEMONTID:0001550 |
| 37173  | Geranic acid            | C10H16O2 |  | 2157.558 | 100.052 |                              |                   |
| 3724   | trans-Farnesol          | C15H26O  |  | 2165.208 | 69.07   | CRDAMVZIKSXKFV-YFVJMOTDSA-N  | CHEMONTID:0001550 |
| 63160  | Ethyl heptadecanoate    | C19H38O2 |  | 2166.633 | 88.052  |                              |                   |
| 59346  | gamma-Dodecalactone     | C12H22O2 |  | 2180.733 | 85.028  | WGPCZPLRVAXPW-UHFFFAOYSA-N   | CHEMONTID:0001245 |
| 21892  | 1-Hexadecanol           | C16H32O  |  | 2181.808 | 196.219 | BXWNKGSJHAJOGX-UHFFFAOYSA-N  | CHEMONTID:0001334 |
| 84607  | 2-Phenylethyl octanoate | C16H24O2 |  | 2184.358 | 104.062 |                              |                   |
| 33547  | Undecanoic acid         | C11H22O2 |  | 2186.358 | 60.021  |                              |                   |
| 110639 | Dihydrobenzofuran       | C8H8O    |  | 2197.908 | 120.057 | HBEDSQVIWPRPAY-UHFFFAOYSA-N  |                   |
| 79196  | delta-Dodecalactone     | C12H22O2 |  | 2215.445 | 99.044  | QRPLZGZHJABGRS-UHFFFAOYSA-N  | CHEMONTID:0001244 |
| 24154  | Butyl palmitate         | C20H40O2 |  | 2218.958 | 257.248 |                              |                   |
| 105976 | Indole                  | C8H7N    |  | 2231.145 | 117.057 | SIKJAQJRHWYJAI-UHFFFAOYSA-N  | CHEMONTID:0002497 |
| 63171  | Ethyl octadecanoate     | C20H40O2 |  | 2236.295 | 88.052  |                              |                   |
| 160684 | Triethyl citrate        | C12H20O7 |  | 2241.97  | 157.05  |                              |                   |
| 78766  | Succinimide             | C4H5NO2  |  | 2247.27  | 99.031  | KZNICNPSHKQLFF-UHFFFAOYSA-N  | CHEMONTID:0001158 |
| 7814   | Ethyl oleate            | C20H38O2 |  | 2249.48  | 264.245 |                              |                   |
| 87049  | Benzophenone            | C13H10O  |  | 2252.343 | 182.073 | RWCCWEUUXYIKHB-UHFFFAOYSA-N  | CHEMONTID:0000120 |
| 84608  | 2-Phenylethyl nonanoate | C17H26O2 |  | 2257.455 | 104.062 |                              |                   |
| 44889  | Dodecanoic acid         | C12H24O2 |  | 2257.643 | 60.021  |                              |                   |
| 125785 | 3-Methylindole          | C9H9N    |  | 2263.318 | 130.065 | ZFRKQXVRDFCRJG-UHFFFAOYSA-N  | CHEMONTID:0002497 |
| 77412  | 5-Hydroxymethylfurfural | C6H6O3   |  | 2269.98  | 126.031 | NOEGNKMFQWQSLB-UHFFFAOYSA-N  | CHEMONTID:0001831 |
| 35402  | Ethyl linoleate         | C20H36O2 |  | 2283.655 | 308.271 |                              |                   |

|        |                         |          |  |          |         |                             |                   |
|--------|-------------------------|----------|--|----------|---------|-----------------------------|-------------------|
| 155194 | Vanillin                | C8H8O3   |  | 2318.43  | 152.047 | MWOOGOJBHIARFG-UHFFFAOYSA-N | CHEMONTID:0000190 |
| 76629  | 2-Furanylethanol        | C6H8O3   |  | 2325.53  | 128.047 |                             |                   |
| 84563  | 2-Phenylethyl decanoate | C18H28O2 |  | 2339.755 | 104.062 |                             |                   |
| 87937  | Benzyl benzoate         | C14H12O2 |  | 2370.405 | 212.083 |                             |                   |
| 44887  | Tetradecanoic acid      | C14H28O2 |  | 2436.628 | 60.021  |                             |                   |

| <b>Supplemental TableS8_MSHub annotation accuracy testing</b> |                        |                                                                                 |                                                                                                                                                                                   |
|---------------------------------------------------------------|------------------------|---------------------------------------------------------------------------------|-----------------------------------------------------------------------------------------------------------------------------------------------------------------------------------|
| <b>Metabolomics Workbench</b>                                 | <b>Number of files</b> | <b>GNPS deconvolution link for MS</b>                                           | <b>GNPS library search link, MSHub deconvolution</b>                                                                                                                              |
| Subset 5 files                                                | 5                      | <a href="https://gnps.ucsd.edu/ProteoSAFe">https://gnps.ucsd.edu/ProteoSAFe</a> | <a href="https://gnps.ucsd.edu/ProteoSAFe/status.jsp?task=66af7b6ed1894b89a40ee1559f68f03f">https://gnps.ucsd.edu/ProteoSAFe/status.jsp?task=66af7b6ed1894b89a40ee1559f68f03f</a> |
| Subset 10 files                                               | 10                     | <a href="https://gnps.ucsd.edu/ProteoSAFe">https://gnps.ucsd.edu/ProteoSAFe</a> | <a href="https://gnps.ucsd.edu/ProteoSAFe/status.jsp?task=f40db6d96c1e4ce6bbb4fe9ab88e5a1d">https://gnps.ucsd.edu/ProteoSAFe/status.jsp?task=f40db6d96c1e4ce6bbb4fe9ab88e5a1d</a> |
| Subset 20 files                                               | 20                     | <a href="https://gnps.ucsd.edu/ProteoSAFe">https://gnps.ucsd.edu/ProteoSAFe</a> | <a href="https://gnps.ucsd.edu/ProteoSAFe/status.jsp?task=af8a292b4c2e4226833e8d4f37a6141d">https://gnps.ucsd.edu/ProteoSAFe/status.jsp?task=af8a292b4c2e4226833e8d4f37a6141d</a> |
| Subset 30 files                                               | 30                     | <a href="https://gnps.ucsd.edu/ProteoSAFe">https://gnps.ucsd.edu/ProteoSAFe</a> | <a href="https://gnps.ucsd.edu/ProteoSAFe/status.jsp?task=7fcb253c5d3743b4a0715bbe2216963a">https://gnps.ucsd.edu/ProteoSAFe/status.jsp?task=7fcb253c5d3743b4a0715bbe2216963a</a> |
| Subset 40 files                                               | 40                     | <a href="https://gnps.ucsd.edu/ProteoSAFe">https://gnps.ucsd.edu/ProteoSAFe</a> | <a href="https://gnps.ucsd.edu/ProteoSAFe/status.jsp?task=8a126cec39704c8fa148220630200041">https://gnps.ucsd.edu/ProteoSAFe/status.jsp?task=8a126cec39704c8fa148220630200041</a> |
| Subset 50 files                                               | 50                     | <a href="https://gnps.ucsd.edu/ProteoSAFe">https://gnps.ucsd.edu/ProteoSAFe</a> | <a href="https://gnps.ucsd.edu/ProteoSAFe/status.jsp?task=562d5808353042da998ed2e561ea4833">https://gnps.ucsd.edu/ProteoSAFe/status.jsp?task=562d5808353042da998ed2e561ea4833</a> |
| Subset 100 files                                              | 100                    | <a href="https://gnps.ucsd.edu/ProteoSAFe">https://gnps.ucsd.edu/ProteoSAFe</a> | <a href="https://gnps.ucsd.edu/ProteoSAFe/status.jsp?task=ad5156516b924f06b5e78f34c793fce4">https://gnps.ucsd.edu/ProteoSAFe/status.jsp?task=ad5156516b924f06b5e78f34c793fce4</a> |
| Subset 150 files                                              | 150                    | <a href="https://gnps.ucsd.edu/ProteoSAFe">https://gnps.ucsd.edu/ProteoSAFe</a> | <a href="https://gnps.ucsd.edu/ProteoSAFe/status.jsp?task=c757c34fd4b24bd8890ca9e41f2ccbe6">https://gnps.ucsd.edu/ProteoSAFe/status.jsp?task=c757c34fd4b24bd8890ca9e41f2ccbe6</a> |
| Subset 200 files                                              | 200                    | <a href="https://gnps.ucsd.edu/ProteoSAFe">https://gnps.ucsd.edu/ProteoSAFe</a> | <a href="https://gnps.ucsd.edu/ProteoSAFe/status.jsp?task=307bcc2a80ab432d87028141b07e8483">https://gnps.ucsd.edu/ProteoSAFe/status.jsp?task=307bcc2a80ab432d87028141b07e8483</a> |
| Subset 250 files                                              | 250                    | <a href="https://gnps.ucsd.edu/ProteoSAFe">https://gnps.ucsd.edu/ProteoSAFe</a> | <a href="https://gnps.ucsd.edu/ProteoSAFe/status.jsp?task=d132c3e31f604136babb67d092e52410">https://gnps.ucsd.edu/ProteoSAFe/status.jsp?task=d132c3e31f604136babb67d092e52410</a> |
| Full set 300 files                                            | 300                    | <a href="https://gnps.ucsd.edu/ProteoSAFe">https://gnps.ucsd.edu/ProteoSAFe</a> | <a href="https://gnps.ucsd.edu/ProteoSAFe/status.jsp?task=4f2de61ac9b949ddb1dd68b0d2fcd76f">https://gnps.ucsd.edu/ProteoSAFe/status.jsp?task=4f2de61ac9b949ddb1dd68b0d2fcd76f</a> |

## Supplementary Notes

### MSHub description:

The MSHub platform includes a set of modules for optimized analytical pre-processing workflow for raw gas chromatography-mass spectrometry (GC-MS) data. It accounts for common bio-analytical complexities (including data volume burden, platform-specific biases and noise structure) inherent to high-throughput GC-MS datasets of biological samples. The proposed pipeline includes a series of designated modules from raw data import, noise/baseline removal and peak alignment strategies to machine-learning driven fragmentation spectra extraction and quantity integral calculation of molecules. All processing modules have been designed to operate in an iterative fashion (i.e. processing a single sample dataset at a time) and are thus scalable for processing of hundreds to thousands of samples.

*i) Raw data import:* The module builds an HDF5 database file and writes raw GC-MS data from multiple data files into it. It supports reading of the data from multiple open-source data formats including ANDI-MS/.NetCDF and .mzML. The output database file contains a series of mass spectral scans taken along the retention time axis for each of the imported files. Each scan is a matrix of pairs of raw  $m/z$  values and peak intensities. *ii)  $m/z$  peak matching:* Since raw GC-MS data are generally acquired at nominal mass resolution, this module performs  $m/z$  peak matching by integrating the raw data to fixed  $m/z$  intervals with a nominal mass resolution. By default, the data are integrated at nominal mass with the boundaries set at -0.3 and +0.7 to reduce the shift of fragments between different  $m/z$  intervals<sup>1</sup>. For high-resolution mass spectrometry data, MSHub offers a kernel-based clustering approach to match  $m/z$  values within and between samples at a mass spectrometer's native resolution. This option is currently available as a stand-alone code. Each sample is then represented by 2D data matrix with each row corresponding to a nominal mass spectrum at a specific time point and each column corresponding to an ion chromatogram *iii) Noise filtering and baseline correction:* GC-MS data both contain high-frequency electronic noise and low frequency baseline distortions emerging due to various instrumental and experimental imperfections<sup>2</sup>. The module performs adjustments of high-frequency noise by applying a digital polynomial (Savitzky-Golay<sup>3</sup>) filter. It is particularly suited to filter out noise without distorting the chromatographic signal tendency<sup>4</sup>. In addition, the morphological filter is applied to correct baseline distortions<sup>3</sup>. The frame-lengths for these filters are automatically estimated with regard to the width of the average chromatographic peak. This procedure acts on single ion chromatograms of sample data matrix. *iv) Retention time alignment:* The inherent drifts of peaks in ion chromatograms between samples are adjusted by means of recursive segment-wise peak alignment strategy<sup>5</sup>. In brief, the strategy refines the alignment of a given ion chromatogram with regard to the reference one in a top-down fashion. It starts by shifting of all ion chromatographic peaks and then progresses to smaller segments when further alignment is required. The optimal shift position is found at the maximum of the cross correlation function:



$$corr(r, s) = \sum_{i=1}^n r(i) \cdot s(i + d)$$

[S.1]

$$d_{opt} = argmax(corr(r, s)_d)$$

[S.2]

where  $d_{opt}$  is an optimal shift between reference ( $r$ ) and test ( $s$ ) segments and  $n$  is a segment length. The calculation of this cross correlation function is accelerated by the Fast Fourier transform.

$$corr(r, s)_d \leftrightarrow R(j) \cdot S^*(j)$$

[S.3]

where  $R$  and  $S$  are the Fourier transform of functions of  $r$  and  $s$ , respectively, superscript star (\*) denotes a complex conjugation and  $\leftrightarrow$  denotes fast Fourier transform (FFT). The cross correlation function is calculated by applying a fast Fourier transform to both  $r$  and  $s$  functions, multiplying the transformed functions,  $R$  and  $S^*$ , and finally performing the inverse Fourier transform of this product. The use of FFT reduces the alignment complexity from  $O(N^2)$  to  $O(N \cdot \log N)$  making it possible to perform alignment at a full chromatographic resolution. The reference profile is selected as a mean chromatographic ion profile across an entire dataset. The maximum peak shift and minimum segment width parameters are automatically defined with respect to the average peak width but can be overwritten by the user if known a priori. With this strategy, MSHub algorithm is capable of correcting both linear and considerable non-linear shifts of ion chromatograms, and doesn't rely on a simple linear shift of ion chromatograms.  $v$ ) *Spectral deconvolution*: Following peak alignment, the individual chromatographic peaks are detected by means of the smoothed Savitzky-Golay first derivative and integrated using the trapezium rule. Each chromatographic peak with a given retention time index is arranged into the data matrix of nominal mass spectra with rows and columns representing samples and  $m/z$  channels, respectively. This data matrix may contain multiple co-eluting molecules with distinct but potentially correlated and overlapping fragmentation spectra. Mathematically, the deconvolution process of co-eluting molecules can then be formulated as:

$$X \approx \sum_{i=1}^k W_i \cdot H_i + E$$

where  $X$  is a mass spectral data matrix at a given retention time index;  $W_i$  and  $H_i$  are a fragmentation MS spectrum and level of the deconvolved  $i$ -th molecular component and  $E$  is the residual data matrix. We have recently shown that the solution to the above problem can be effectively found via unsupervised machine learning strategy using non-negative matrix factorization tools<sup>6</sup>. It allows the deconvolution of potentially multiple co-eluting molecules taking advantage of increased number of samples. The fragmentation pattern and levels of a molecule are recovered from component loadings and scores, respectively. To assess the reproducibility of fragmentation patterns between samples, we defined the balance score as the percentage of variance explained by the component as

$$B_{score} = 100 \cdot (1 - ||X - W_i \cdot H_i||^2 / ||X||^2)$$

$||X||^2$  denotes the sum-of-squares of the elements in  $X$ . If a given component explains the majority of variation (>95%), this means that the fragmentation patterns are consistent between samples.

The number of components for each chromatographic peak is determined automatically, so that each component has to explain at least 5% of the total variation between samples. In this regard, spectral patterns that are consistent across samples, even if only a few samples in the data contain them, would result in a high value of the balance score. The patterns with balance scores below 1% are removed as noise. At the results stage, users then can apply their own filtering to retain the spectral library matches that they deem of high quality using match score, balance score, number of shared peaks in the spectrum, total ion chromatogram (TIC), Kovats RI (if enabled by user) and used library(ies). The guidelines for the balance score filtering strategies are given in the tutorial.

We have designed the MSHub to follow the key requirements for large scale MS studies such as analytical transparency and reproducibility, workflow versatility, and scalability <sup>7</sup>. The unique features of the platform are:

(A) modular, customizable and readily extendable workflow with enhanced data pre-processing capabilities, covering all prerequisite steps for chromatography mass spectrometry data processing (**Figure 1**)

(B) a scalable “out of core” data pre-processing pipeline; out of core (or “external memory”) processing is a technique used to process data that is too exhaustive to fit in a computer’s main memory (RAM). All MSHub algorithms have been designed to operate iteratively for enhanced scalability by using high performance HDF5 technologies. A design feature incorporated into MSHub allows individual sample data to be uploaded one at a time into the specific module, where after data are processed, deleted from memory and deposited back into the data repository, with this procedure then repeated iteratively. **Figure S2a-f** illustrates linear dependency between the number of samples processed and the processing time, with less than 20 hours of total processing time for ~5000 GC-MS profiles on a single core desktop PC. Since only one sample is stored in memory at any given time, the workflow memory load is constant.

(C) Machine-learning enhanced fragmentation pattern deconvolution: in contrast to other solutions, MSHub extracts fragmentation spectra of individual components and their relative levels using unsupervised learning via non-negative matrix factorization tools. This allows the extraction of reproducible fragmentation patterns between spectra, as well as robust separation of co-eluting components.

(D) workflow reproducibility – all workflow steps and generated pre-processing metadata (e.g. common *m/z* or retention time feature vector, choice of baseline correction strategy, user defined parameter settings) are stored as part of the database file. This feature allows consistent and reliable comparison between newly collected and archived data.

The output of the pre-processing workflow includes fragmentation spectra and quantitative integrals of molecules. The putative annotation of the extracted fragmentation spectra from GC-MS data can be achieved with the use of library search workflow. The workflow utilizes any of the user-provided libraries (in all the examples given in the present manuscript the mass spectral databases of NIST 17 (<http://www.nist.gov/srd/nist1a.cfm>) and Wiley (<https://www.wiley.com/en-us/Wiley+Registry%3A+Mass+Spectral+Library%2C+11th+Edition+NIST+2017-p-9781119412236>) were used, as well as public libraries available on GNPS such as the Golm Metabolome Database (GMD, <http://gmd.mpimp-golm.mpg.de>) or user’s own in-house spectral databases. The MSHub platform has been benchmarked with regard to the extraction of molecular fragmentation spectra and their quantitative integrals in small scale studies (up-to 100 breath samples) against existing state-of-the-art open-source (“XCMS”)<sup>8</sup> and proprietary (MassHunter, Agilent and ChromaTOF, LECO) processing pipelines. In case of small scale studies of standard mixtures where the data size is sufficient for “in-core” processing (i.e. can fit into the main memory) and minor retention time drifts are expected, the high similarity (>99%)

between the extracted molecular fragmentation spectra and their quantity integrals by XCMS and MSHub processing pipelines was achieved (see **Figure 2t,u**).

We have benchmarked the MSHub against other tools, both in terms of deconvolution accuracy and processing times. Deconvolution accuracy of MSHub is similar or better than the other tools operated under optimal settings (**Figure S3, S5**). Alternative deconvolution/alignment tools include: MZmine<sup>9</sup>, OpenChrom<sup>8,10</sup>, AMDIS<sup>11</sup>, MZmine/ADAP<sup>12</sup>, MS-DIAL<sup>13</sup>, BinBase<sup>14</sup>, XCMS<sup>15</sup>/XCMS Online<sup>8</sup>, MetAlign<sup>16</sup>, SpecAlign<sup>17</sup>, SpectConnect<sup>18</sup>, PARAFAC2<sup>19</sup>, MeltDB<sup>20</sup>, eRah<sup>21</sup>).

The processing times of other tools scale exponentially with the number of files and thus they fail for datasets of a certain number of files, depending on the computing power of the server (**Figure S4**). As for all deconvolution algorithms, peak overloading reduces data quality. MSHub finds less accurate spectral patterns across samples for saturated peaks, as the frequency domain information is no longer consistent for those ions across all files, lowering the balance score. Overloading does not affect the signals - and the resulting balance scores - that are not saturated. The optimal solution to mitigate possible deconvolution errors is experimentally reducing the amount of sample that is loaded onto the GC-MS column.

### **GC-MS analysis for validation studies**

Prior to analysis, all of the data were converted from vendor's proprietary formats to .NetCDF or .mzML, uploaded to MassIVE (<https://massive.ucsd.edu>; the corresponding dataset IDs are listed in the **Table S1**) and processed using GNPS GC-MS data analysis workflow as described in the [tutorial](#). The compounds were annotated via matching spectra to the public reference libraries available on GNPS (currently GNPS has Fiehn<sup>22</sup>, HMDB<sup>23</sup>, MoNA<sup>24</sup>, VocBinBase<sup>14</sup>) as well as NIST 17 and Wiley (the latter two combined make up 1,051,748 of spectra). All of the corresponding analysis links are listed in **Table S1**.

#### *Testing and validation dataset of derivatized human blood serum spiked with standards (datasets Test1-Tes11, #17 in Table S1)*

Acetonitrile, isopropanol, and pyridine were of LC-MS grade, and methoxyamine hydrochloride (MeOX), 1% TMCS in *N*-methyl-*N*-trimethylsilyl-trifluoroacetamide (MSTFA), and adonitol were obtained from Sigma-Aldrich, St. Louis, USA. Human serum (Cat. No. H6914) from a US origin individual male clotted whole blood, AB positive group, sterile-filtered) was obtained from Sigma-Aldrich, St. Louis, USA. Fatty acid methyl ester (FAMES) mixtures (Supelco® 37 Component FAME Mix - 10 mg/mL in methylene chloride (varied concentration, 2-4% wt. basis) (Cat. No. 47885-U) was obtained from Sigma-Aldrich, St. Louis, USA. An n-hydrocarbon mixture of C8 - C40 (even C numbers), 17 components mixture (Cat. No. 95394) (concentration, 2000 µg/mL) was obtained from Absolute Standards Inc., CT, USA.

Post-thawing, human serum samples (30 µL) were sequentially extracted using solvent extraction, once with 1 mL of acetonitrile: isopropanol: water (3:3:2, v/v) ratio, followed by another extraction with 500 µL of acetonitrile: water (1:1, v/v) ratio mixture at 4 °C. Adonitol (Cat. No. A5502-5G, Sigma-Aldrich; 5 µL from a 10 mg/ml stock), an internal standard was added to all samples prior to solvent extraction. The pooled extracts (~ 1500 µL) resulting from the two steps were dried *in vacuo* at 4 °C prior to chemical derivatization. Dummy extractions were performed

in blank tubes that served as extraction blanks for background subtraction of noise resulting from extraction solvents, derivatization reagents, unwanted sources, and other sources of contamination from the analytical platform, i.e., septa, liner, column, vials, handling etc. All samples (i.e., except FAMES and n-alkanes) were sequentially derivatized with methoxyamine hydrochloride (MeOX) and 1% TMCS in *N*-methyl-*N*-trimethylsilyl-trifluoroacetamide (MSTFA) as follows. The steps involved the addition of 10  $\mu$ L of MeOX (20 mg/mL in pyridine) incubated at 55 °C for 60 min followed by trimethylsilylation at 60 °C for 60 min after adding 90  $\mu$ L MSTFA.

The acquisition sequence started with blank solvent (pyridine) injections, followed by randomized lists of extraction blanks (B), reagent blanks (R), solvent (pyridine-P), and samples (S). FAMES and n-hydrocarbon mixtures were spiked into the derivatized human serum samples as described in **Supplemental Table 1**. A robotic arm TriPlus™ RSH autosampler (Thermo Scientific™, Bremen, Germany) was used to inject 1  $\mu$ L of derivatized sample into a split/splitless (SSL) injector set at 250 °C using splitless injection onto a TRACE™ 1310 gas chromatograph (Thermo Scientific™, Austin, TX). Helium was used as a carrier gas at a flow rate of 1 mL/min for separation on a TG-5SILMS™ 30 m length  $\times$  0.25 mm i.d.  $\times$  0.25  $\mu$ m film thickness column (Thermo Scientific™, P/N, 26096-1420). The initial oven temperature held at 70 °C for 4 min was ramped through an initial gradient of 20 °C/min ramp rate. The final temperature was set to 320 °C and was held for 8 min. Eluting peaks moved through an auxiliary transfer line temperature of 250 °C into a QExactive™-GC mass spectrometer (Thermo Scientific™, Bremen, Germany). Electron ionisation (EI) at 70 eV energy, an emission current of 50  $\mu$ A and an ion source temperature of 230 °C was used in all experiments. A filament delay of 5.3 min was selected to prevent excess reagents from being ionized. High resolution EI spectra were acquired using 60,000 resolution (FWHM at  $m/z$  200) with a mass range of  $m/z$  50-650.

*Cheese volatiles (datasets #13-15, Table S1) and cheese bacteria grown on cheese-agar media (datasets #13-15, 28 in Table S1)*

Two cheese types, Bonde and Stilton were purchased at Whole Foods store. Small cubes of approximately 1.25 cm<sup>3</sup> were cut from pieces of cheese, both rind and bulk, to collect samples across the entire piece, placed into Eppendorf tubes and stored in -80°C freezer until analysis. For the bacterial cultures samples, *Brevibacterium* and *Brachybacterium* isolates were grown on various cheeses (Langres, Cornish Yarg, Robiola della Spazza Camino, Ascutney Mountain, Sharfe Maxx, Gruyere, Challerhocker, Bayley Hazen Blue). Prior to analysis, the frozen samples were transferred into 2 mL borosilicate vials, capped with a screw cap with silicone septum and allowed to thaw. The GC-MS analysis was carried out on a Thermo Scientific TRACE 1310 GC [TG-5MS column; length, 30 m; ID (inner diameter), 0.25 mm; film thickness column, 0.25  $\mu$ m] and a TSQ 8000 EVO mass spectrometer (Thermo Fisher Scientific), equipped with electron ionization (EI) source and a robotic sampler system. The PDMS/DVB SPME (Supelco) tip was inserted by the sampling robot into the vial, and the sample was heated to 160 °C and agitated for 10 min. Upon sample extraction, the SPME was inserted into the GC inlet maintained at 250 °C, and the extracted compounds were desorbed for 1 min. The GC protocol was as follows: cryofocusing on the head of the column at -10 °C for 1.25 min; 100 °C/min oven ramp to 40 °C (hold of 0.1 min), 15 °C/min oven ramp to 280 °C (hold of 0.1 min), and a 3 min hold period to purge the column. The helium carrier gas was set to constant 2 mL/min flow, splitless injection mode was used throughout. The scanned  $m/z$  range in a single quadrupole was 35-350. The

empty vial blanks were interspersed with the samples. Quality controls of natural mint oil extract were run along with samples throughout the analysis to monitor instrument performance and SPME wear.

#### *Skin volatilome analysis*

All of the sampling has been conducted under UC San Diego IRB #171662. Cleaned and degassed polydimethylsiloxane (PDMS, Goodfellow, Coraopolis, PA) 1 x 2 cm patches have been placed on 52 different points of the skin of a volunteer and secured in place with waterproof bandage. The sampling was conducted for 6 h during which volunteer performed normal daily activities.

#### Headspace sample introduction (datasets #19, 26 in Table S1)

After sampling, the bandage was removed, and patches placed into 2 mL borosilicate vials using clean tweezers and capped with a crimp cap with silicone septum. The GC-MS analysis was carried out using the Agilent 7200 GC/QToF (Agilent Technologies, Santa Clara, CA) equipped with a robotic sampler system. The separation was conducted on a HP-5MS column (30 m x 0.25 mm x 0.25  $\mu$ m). The patch within the vial was heated for 20 min. at 200 °C to desorb volatiles from the patch and 0.5 mL of headspace injected (injector temperature set at 250 °C) into the instrument with a headspace syringe heated to 145 °C. The GC protocol analysis included: starting temperature 45 °C; 50 °C/min oven ramp to 100 °C (hold of 0.1 min), 15 °C/min oven ramp to 300 °C (hold of 0.1 min), and 50 °C/min oven ramp to 320 °C purge the column. The helium carrier gas was set to constant 1.2 mL/min flow and a splitless injection mode was applied. The scanned  $m/z$  range was 35-400 with the acquisition rate of 10 spectra/s. The empty vial blanks and blank PDMS patches were interspersed with the samples to assess background signal. Quality controls of natural mint oil extract were run along with samples before and after the analysis as described above.

#### Liquid sample extraction (datasets #27 in Table S1)

After sampling, the bandage was removed, patches placed into 2 mL borosilicate vials using clean tweezers and 150  $\mu$ L of HPLC grade methanol added for extraction. The extraction was carried out overnight at room temperature. After extraction, the methanol extract was transferred into a 200  $\mu$ L insert in a 2 mL vial and the vial capped with a cap with silicone septum. The GC-MS analysis was carried out using the Agilent 7200 GC-QTOF equipped with a robotic sampler system. The separation was conducted on an HP-5MS column (30 m x 0.25 mm x 0.25  $\mu$ m). Sample (1  $\mu$ L) was injected at split 2:1. The injector temperature was set at 250 °C. The GC protocol analysis was as follows: starting temperature 40 °C for 1 min; 20 °C/min oven ramp to 110 °C, 10 °C/min oven ramp to 300 °C and 50 °C/min oven ramp to 320 °C purge the column. The helium carrier gas was set to constant 1.2 mL/min flow and a splitless injection mode was applied. The scanned  $m/z$  range was 35-400 Th with the acquisition rate of 20 spectra/s. The methanol solvent blanks and blank PDMS patches extracts were interspersed with the samples to assess background signal. Quality controls of natural mint oil extract were run along with samples before and after the analysis as described above.

#### *Oesophageal and gastric cancer (OGC) detection using exhaled breath analysis*

Participant recruitment:



Ethical approval was obtained (REC 14/LO/1136) and all participants provided written informed consent. Participants for this study were recruited from Imperial College Healthcare NHS Trust into two possible groups – either those with known oesophago-gastric cancer (OGC) or a non-cancer control group. The participants who entered into the non-cancer control group were recruited from the endoscopy suite at Imperial College Healthcare NHS Trust and were undergoing an upper gastrointestinal endoscopy on the day of providing an exhaled breath sample (and were found not to have oesophageal or gastric cancer). If patients were also undergoing a colonoscopy at the same time (and had received bowel preparation medications) they were not eligible to participate in the study. The participants who entered into the OGC group were patients who had a biopsy proven invasive gastric or oesophageal adenocarcinoma. These patients were recruited from three possible locations – either on the day of undergoing a diagnostic upper gastrointestinal endoscopy, on the day of having a staging laparoscopy and upper gastrointestinal endoscopy under general anesthetic (part of the routine staging investigations for OGC), or on the day of review in the outpatient clinic. Patients who had already received surgical or oncological (chemotherapy or radiotherapy) treatment for oesophageal or gastric cancer were not eligible to participate in the study. Participants were between the ages of 18 and 90, and were excluded if they were known to have liver disease (including oesophageal varices and known portal hypertension, an acute infection, another type of cancer presently or within the past 5 yrs, or known inflammatory conditions of the small or large bowel.

#### Breath sample collection:

Exhaled breath samples were collected using a standardized breath-sampling device, 'Respiration Collector for In Vitro Analysis' (ReCIVA™) (Owlstone Medical, Cambridge, UK) in combination with a dedicated clean air supply 'Clean Air Supply Pump for ReCIVA' (CASPER) (Owlstone Medical, Cambridge, UK)<sup>25</sup>. All participants were fasted for a minimum of 4 h and rested for 20 min. prior to exhaled breath sample collection.

Two studies were performed. For study one, four sampling thermal desorption (TD) tubes (Tenax/Carbograph-5TD, Markes International Ltd, Llantrisant, UK) were used per participant. For study two, one sampling TD tube (Tenax/Carbograph-5TD, Markes International Ltd, Llantrisant, UK) was used per participant. Prior to sample collection all TD tubes were conditioned for 40 min. at 330 °C using a TC-20 tube conditioner (Markes International Ltd, Llantrisant, UK). The TD tubes were stored in an airtight polypropylene container at room temperature and used for sample collection within 24 h of conditioning.

Exhaled breath collection was performed using a standardized protocol with the participant performing normal tidal respiration whilst seated<sup>25</sup>. For study one exhaled breath sample collection with the ReCIVA device was performed using a sample volume 250 mL per TD tube, and a sample flow rate of 400 mL/min. For study two exhaled breath sample collection with the ReCIVA device was performed using a sample volume 500 mL per TD tube, and a sample flow rate of 200 mL/min. Prior to analysis TD tubes were stored in an airtight polypropylene container at room temperature and all TD tubes were analyzed within 12 h of breath sample collection. TD tubes that had been conditioned in preparation for exhaled breath sample collection and subsequently not used (due to a lower than expected number of participants

being recruited were) analyzed concurrently with the exhaled breath samples as 'blank' TD tubes.

#### Analysis with TD-GC-MS:

The exhaled breath and blank TD tubes samples were analyzed using TD-GC-MS. The TD tubes were desorbed using a Markes TD-100 thermal desorption unit (Markes International Ltd, Llantrisant, UK) using a two stage desorption program, applying a constant flow of helium at 50 mL/min. In the primary desorption stage, TD tubes were dry-purged for 3 min and heated at 280 °C for 10 min. In the secondary desorption stage, the cold trap (U-T12ME-2S, Markes International Ltd, Llantrisant, UK) was rapidly (99 °C/min) heated to from 10 °C to 290 °C. VOCs were transferred from the TD unit to the GC by means of a capillary line heated at 140 °C. GC-MS analysis was performed using an Agilent 7890B GC with 5977A MSD (Agilent Technologies Ltd, Santa Clara, USA) equipped with a ZB-642 capillary column (60 m x 0.25 mm ID x 1.40 µm df; Phenomenex Inc, Torrance, USA) with helium used as the carrier gas (1 mL/min flow rate). The GC column temperature program was set as follows: 4 min at 40°C, ramp to 100 °C at 5 °C/min with a 1 min hold, ramp to 110 °C at 5 °C/min with a 1 min hold, ramp to 200°C at 5°C/min with a 1 min hold and finally ramp to 240 °C at 10 °C/min with a 4 min hold. The MS transfer line temperature was 240 °C and EI source conditions were 70 eV at 230 °C. Mass spectral acquisition was carried out in the range 20-250 *m/z* with a rate of approximately 6 scans/s.

#### Determination of OGC biomarkers

The feature tables were generated by the GNPS deconvolution workflow of the breath analysis study data (Study 1: dataset #34, Study 2: dataset #35 in **Table S1**). The discriminating features between the OGC and control groups were selected with maximum margin criterion<sup>26</sup>. For Study 1, the area under the curve for the ROC curve was 0.90227; for Study 2 the area under the curve for the ROC curve was 0.74000, leaving patients out cross validation was carried out in both cases. This indicates that cancer detection is possible in both studies, and with very high accuracy of Study 1. The lists of features with corresponding p and q values are given in the Supplemental **Tables S2** and **S3**. The corresponding feature annotations can be related from the GNPS library search jobs listed for the dataset #34 and dataset #35, respectively.

#### *Skin volatome analysis for hedonic value estimation pre- and post-bacterial spray*

All of the sampling has been conducted under Ghent University Ethical Approval #B670201835548, Belgium, and ClinicalTrials.gov identifier NCT03967470, with study called "Armpit bacteriotherapy". A total of 63 volunteers were recruited and selected with a stronger than normal underarm malodor, as determined by a trained odor panel (DOI: 10.1111/exd.13259). The volunteers were using bacterial sprays and placebo sprays in the underarm to verify the effect on the underarm odor. Odor analysis was done using hedonic value measurement by a trained odor panel, as well as GC-MS analysis. Cleaned and degassed PDMS patches were placed on the underarm skin of the volunteer for 4h and secured in place with a large cotton bandage. After sampling, the bandage was removed, patches placed into 2 mL borosilicate vials using clean tweezers and capped with a crimp camp with silicone septum.

The GC-MS analysis was carried out using the Agilent 7200 GC-QToF equipped with robotic sampler system. The separation was conducted on an HP-5MS column (30 m x 0.25 mm x 0.25  $\mu$ m). The patch within the vial was heated for 20 min. at 200 °C to desorb volatiles from the patch and 0.5 mL of headspace injected into the instrument with a headspace syringe heated to 145°C. The GC protocol analysis included: The GC protocol analysis included: starting temperature 45 °C; 50 °C/min oven ramp to 100 °C (hold of 0.1 min), 15 °C/min oven ramp to 300 °C (hold of 0.1 min), and 50 °C/min oven ramp to 320 °C purge the column. The helium carrier gas was set to constant 1.2 mL/min flow and a splitless injection mode was applied. The scanned  $m/z$  range was 35-400 with the acquisition rate of 10 spectra/s. The empty vial blanks were interspersed with the samples to assess background signal. Quality controls of natural mint oil extract were run along with samples before and after the analysis.

### 3D cartography of skin volatiles

Skin sampling has been conducted as described in the <sup>27</sup> by swabbing areas of skin with a cotton swab and extracting the swabs using ethanol. The samples were stored in -80 °C freezer until analysis. The GC-MS analysis was carried out on a Thermo Scientific TRACE 1310 GC-MS [TG-5MS column; 30 m (length) x 0.25 mm ID (inner diameter) x 0.25  $\mu$ m (film thickness column)] and a TSQ 8000 EVO mass spectrometer (Thermo Fisher Scientific), equipped with electron ionization (EI) source, equipped with robotic sampler system. Aliquot of sample (1  $\mu$ L) was injected into the GC inlet maintained at 250 °C. The GC protocol was as follows: starting temperature 40 °C (hold of 0.1 min), 15 °C/min oven ramp to 280 °C (hold of 0.1 min), and a 3 min hold period to purge the column. The helium carrier gas was set to constant 2 mL/min flow, splitless injection mode was used throughout. The scanned  $m/z$  range in a single quadrupole was 35-350 with solvent delay of 4 min..

### Volatilome of human-built environment/HomeChem project (dataset #12, Table S1)

Cleaned and degassed PDMS (Goodfellow, Coraopolis, PA) 1 x 2 cm patches have been placed on different locations across the test house (the detailed description of the project can be found at: <https://indoorchem.org/projects/homechem/>) and exposed to air for 3 h. After sampling, the patches were placed into 2 mL borosilicate vials using clean tweezers and capped with a crimp cap with silicone septum. The GC-MS analysis was carried out using the Agilent 7200 GC/QTOF equipped with a robotic sampler system. The separation was conducted on an HP-5MS column (30 m x 0.25 mm x 0.25  $\mu$ m). The patch within the vial was heated for 20 min. at 200°C to desorb volatiles from the patch and 0.5 mL of headspace injected (injector temperature set at 250 °C) into the instrument with a headspace syringe heated to 145 °C. The GC protocol analysis included: starting temperature 45 °C; 50 °C/min oven ramp to 100 °C (hold of 0.1 min), 15 °C/min oven ramp to 300 °C (hold of 0.1 min), and 50 °C/min oven ramp to 320 °C purge the column. The helium carrier gas was set to constant 1.2 mL/min flow and a splitless injection mode was applied. The scanned  $m/z$  range was 35-400 with the acquisition rate of 10 spectra/s. The empty vial blanks and blank PDMS patches were interspersed with the samples to assess background signal. Quality controls of natural mint oil extract were run along with samples before and after the analysis.

## VOCs from Dendrobatids frogs from Colombia (dataset # 11, Table S1)

### Collection of specimens

Between 2 and 16 specimens were captured in the Departments of Chocó, Cundinamarca, and Leticia between 2016 and 2018. A framework permit to conduct this study was provided by Autoridad Nacional de Licencias Ambientales (ANLA) in the resolution 1177, granted to La Universidad de los Andes for the Collection of Specimens of Wild Species of Biological Diversity for Non-Commercial Scientific Research Purposes. The animals were collected by visual encounter protocols. All animals were collected using a plastic cup to avoid hand manipulation and kept in plastic bags with a small portion of water to avoid dehydration.

Afterward, the animals were transported to the Universidad de los Andes where three types of sampling methods were performed. First, an *in vivo* sampling of the VOCs released by each frog. Secondly, a VOCs sampling of the frog's skin after euthanization. Both procedures were performed following the protocol designed by Brunetti et al. (2015). Third, a solid-liquid extraction of the compounds in 1 mL of MeOH 98%. These analyses were performed for tacking and comparing the VOCs released by different species of Dendrobatids (Gonzalez et al., unpublished data). This study was carried out according to the regulations specified by the Institutional Animal Care and Use Committee of the Facultad de Ciencias de la Universidad de los Andes, (FUA\_19-015).

### *In vivo* VOCs sampling

Live frogs were sampled using HS-SPME/GC-MS analysis. Each specimen was freed from urine by applying a gentle pressure to the bladder. It was then placed inside a glass chamber designed especially for sampling frogs' VOCs by opening the bottom side of the chamber and immediately closed. Then, the upper side was sealed with a SPME compatible caps of 20 mm with PTFE septa (JG Finneran, Vineland, NJ, USA), and the chamber was introduced in a water bath set at 35 °C. It is worth mentioning that during field and laboratory handling, the characteristic smells of the frogs were perceived when the individuals were incidentally stressed. So, in order to promote the release of these compounds, we performed the *in vivo* sampling by applying a mild electrical stimulation. Two platinum electrodes were inserted through the small holes on the lateral sides of the glass chamber. After exposing a DVB/CAR/PDMS SPME fiber (SUPELCO, PA, USA) for 30 min, it was immediately inserted into the injection port of the gas chromatograph. Five min after being released from the device, the frog exhibited a normal behavior. Before each experiment, the *in vivo* glass chamber was washed with a non-ionic detergent, rinsed and heated to dryness. After cleaning, a blank run of this device was performed using the same extraction conditions in order to trace contaminants from the chamber or from the cleaning procedure.

### VOCs sampling from skin

Immersion in liquid nitrogen was used as a method of euthanasia. Afterward, each specimen was left at room temperature until thawed. Then the complete skin of the specimen was dissected

carefully, placed in a ceramic mortar and homogenized with liquid nitrogen. Finally, the homogenized skin was placed in an empty glass vial of 22 mL. The weight of the skin was registered. For sampling the VOCs of the frog skin, HS-SPME procedure was performed introducing the glass vial in a water bath set at 45 °C, and exposing a DVB/CAR/PDMS SPME fiber (SUPELCO, PA, USA) for 40 min.

### VOCs GC-MS analysis

The desorption process for *in vivo* VOCs sampling or for the skin's VOCs was carried out in the GC HP 6890 Series equipped with an Agilent Mass Selective Detector 5973 (Agilent Technologies, Palo Alto, CA, USA) at 250 °C using splitless injection. The separation was performed on a BP-5 capillary GC column (30 m × 0.25 mm × 0.25 µm, SGE, Austin, TX, USA) using helium as a carrier gas at a flow rate of 1 mL/ min. The temperature gradient program started at 40 °C for 3 min, followed by an increase to 100 °C at a rate of 6 °C/min, then the temperature was raised to 200 °C at 4 °C/min, and finally to 300 °C at 20 °C/min, and this temperature was maintained for 3 min. The GC-MS filament source and the quadrupole temperature were set at 230 °C and 150 °C, respectively. The electron ionization (EI) source was set at 70 eV, and the mass spectrometer was operated in full scan mode over a mass range from *m/z* 40 to 300 at a scan rate of 2.0 scan/s. All samples, including linear alkanes, were run under the same chromatographic conditions. Linear alkanes of the series C8–C20 were used for the determination of retention indices (RIs) and later for the tentative assignment of compounds. For validation, 4 biological replicates of the experimental procedure were performed.

To trace contaminants from the vial, a blank run was performed before placing the skins. This blank trial was carried out under identical conditions to those used during the extraction of frog skin samples. Blank runs of the fiber were also performed to trace compounds released by the polymers contained in the fiber.

### *Methanolic extracts from Dendrobatids frogs from Colombia (dataset # 38, Table S1)*

Following the removal of the SPME-fiber from the glass vial, the skin was immediately placed in another glass vial of 4 mL where 1 mL of MeOH 98% was added to extract all the soluble compounds. Vortex (20 s) was applied to each vial and the methanolic extracts were kept at -80°C to avoid degradation until the chromatographic analysis was performed. For the GC-MS analysis, 100 µL of the methanolic extract were combined with 10 µL of Decahydroquinoline at 10 ppm as an internal standard (Sigma, St Louis, MO, USA).

The separation was performed on the same instrument and column used for the skins' VOCs analysis, but using a different temperature program for separation and characterization of amphibian alkaloids from Dendrobatids and facilitate the putative annotation of the alkaloids without having RI standardized for these types of compounds. A split injection was used with the objective of not saturate the column.

The flow rate was set to 1.1 mL/min. The temperature gradient program started at 100 °C for 3 min, followed by an increase to 190 °C at a rate of 10 °C/min and maintaining it by 1 min, then the temperature was raised to 200 °C at 2 °C/min and maintaining it by 1 min, and finally to 280 °C at 10 °C/min, and this temperature was maintained for 3 min. Conditions of the MS were equivalent at the method employed for the VOCs analysis from the skin. All samples, including linear alkanes, were run also under these chromatographic conditions.

#### Study of volatiles related to beer aging (dataset # 22, Table S1)

Gas Chromatography coupled to time-of-flight mass spectrometry (GC-TOFMS) was used to investigate the aging process of beer to determine time course trends for individual analytes within the aroma profile. A commercially-available IPA beer was purchased and artificially aged by storage at elevated temperatures. A previously reported protocol calibrated that a single day of storage at 40°C was comparable to one month of storage under appropriate conditions<sup>28</sup>. The protocol was used to generate a time course set of samples by storing samples at 40 °C for 0, 1, 2, 3, 4, 5, 6, 8, 12, or 20 d. For each sample, 5 mL of beer were pipetted into a 10 mL glass vial with septum cap. The samples were incubated for 10 min at 60°C. SPME extraction was performed with a DVB/CAR/PDMS fiber (Supelco) for 20 min at 60°C prior to analysis by GC-TOFMS. The analysis was conducted on Gas Chromatograph Agilent 7890B with LECO L-PAL3 autosampler coupled to LECO Pegasus® BT TOFMS. Chromatographic conditions were as follows: Injection: 3 min desorption in 250 °C inlet. Carrier Gas: He at 1 mL/min at Constant Flow. Column: Stabilwax, 30 m x 0.25 mm i.d. x 0.25 µm coating (Restek). Oven program: hold 4 min at 35 °C, ramp at 5 °C/min to 180 °C, ramp at 10 °C/min to 220 °C and hold 5 min. Transfer line temperature: 250 °C. Mass spectrometer conditions: Ion Source Temperature 250 °C, electron energy 70 eV, acquisition mass range 35-650 *m/z*, acquisition rate 10 spectra/s.

#### Investigation of polar compounds produced by *Prunus persica* after aphid infestation (dataset #30, Table S1)

The metabolic response of peach tree (*Prunus persica*) to green aphid (*Myzus persicae*) has been investigated by GC-MS profiling of the apex polar extracts. Six plants of two cultivars, GF305 (sensitive to *M. persicae*) and Rubira (resistant), were obtained from the germination of seeds after 3 months stratification at 4°C and grown for eight weeks in a green house before transfer in a growth chamber where the experiment took place. Three plants of each genotype were infested with 10 synchronized green aphid female adults (clones MP06). Aphids were removed after 48 h and the plant apex (about 100 mg) were collected in liquid nitrogen and thoroughly ground with a ball mill. Polar compounds were extracted as follow: 10 mg of fresh apex powder were extracted for 15 min. at 70 °C in 1.5 mL of 80% methanol containing 100 µM adonitol as internal standard. The samples were centrifuged, the supernatant was collected and passed through 0.22 µm filters. Then 50 µL of the polar extract was dried overnight under vacuum in glass vials and stored at -20°C before derivatization. GC-MS analysis was performed with an Agilent 7890B gas chromatograph coupled with a LECO Pegasus BT TOFMS. The samples were derivatized online by a Gerstel MPS XT Dual Head robot, according to the following procedure: 50 µL of Pyridine containing 20 mg/mL methoxyamine hydrochloride was added to the dried sample and mixed 1

min at 2000 rpm with a vortex shaker, before incubation 30 min at 80°C under constant shaking at 400 rpm. Then 80 µL of N,O-Bis(trimethylsilyl)trifluoroacetamide (BSTFA) containing a mixture of 9 n-alkanes (C10 to C36) was added and mixed 1 min at 2000 rpm with a vortex shaker before incubation 30 min at 80°C under constant shaking at 400 rpm. Each sample (1 µL) was injected immediately after derivatization was introduced in the injector at 270°C with a 50:1 split-ratio and 1 mL/min helium vector gas flux. The separation was achieved on a Phenomenex Zebron ZB-5MS column (30 m x 0.25 mm x 0.25 µm) with a temperature gradient: 70°C held 1 min., increase up to 220 °C at a rate of 9°C/min, then up to 330 °C at 15 °C/min, held 5 min before cooling. Both the transfer line and the source were set at 250 °C and the electronic impact source filament at 70 eV. Data were acquired after a 275 s solvent delay, at a rate of 10 spectra/s and in a *m/z* range 50 to 630.

#### Earth microbiome project (dataset #18, Table S1)

The samples were collected during the Earth Microbiome Project (<http://earthmicrobiomeproject.org>). Two protocols were used: one for the 105 soil samples and another for the 356 fecal samples. 105 soil samples were received at the Pacific Northwest National Laboratory and were processed as follows. Each soil sample (1 g) was weighed into microcentrifuge tubes (Eppendorf Biopur Safe-Lock, 2.0 mL). 1 mL of ddH<sub>2</sub>O and one scoop of garnet/SS beads and 1 stainless steel (SS) bead was added to each tube. Samples were homogenized (Qiagen, Tissue Lyser) for 3 min. at 30 Hz. Samples were then transferred into 15 mL tubes (Olympus, polypropylene). Ice-cold water (1 mL) was used to rinse the smaller tube and combined into the 15 mL tube. 10 mL of 2:1 (v/v) chloroform:methanol added to each sample using a glass serological pipette and rotated at 4 °C for 10 min. The samples were then placed inside the -70 °C freezer for 10 min.. The samples were centrifuged at 4,000 rpm for 10 min. to separate phases. The top and bottom layers were combined into 40 mL glass vials and dried down until almost dry and frozen at -20 °C, the protein interlayer and debris were discarded. The following day 1 mL of 2:1 chloroform:methanol was added to each large glass vial and the sample was transferred into 1.5 mL Sorenston tubes, spun at 12,000 g to remove debris. The supernatant was transferred into smaller flat bottom glass MS vials and dried all the way down for analysis.

The remaining 356 samples that were received at UCSD which included fecal and sediment samples were processed as follows. Transferred 100 µL of each pellet to a 2 mL Sorenson microcentrifuge tube using a 100 µL scoop (Next Advance, MSP01). Brought final volume of sample to 1.5 mL ensuring the solvent ratio is 3:8:4 H<sub>2</sub>O:CHCl<sub>3</sub>:MeOH by adding the appropriate volumes of H<sub>2</sub>O, MeOH, and CHCl<sub>3</sub>. After transfer, we added 100 µL of 3 mm stainless steel beads (chloroform washed) to each tube. On the day of extraction, we added 400 µL of chilled methanol and kept the tubes on ice to prevent the sample from refreezing after transfer. Added 300 µL chilled nanopure water and vortexed to mix for 30 s. Added 800 µL chilled chloroform and vortexed to mix for 30 s. Transferred out of BSC wiping with a bleach wipe. Transferred any remaining, unused sample from the hood (wiping with a bleach wipe) directly into liquid nitrogen and stored at -70 °C. The samples were then derivatized for GC-MS analysis as follows. A methoxyamine solution with a pyridine concentration of 30 mg/mL was made. Aqueous metabolites dried briefly (>30 min.) SpeedVac if the samples were stored in a freezer. Performed



methoximation by adding 20  $\mu\text{L}$  of methoxyamine solution to the sample vial and vortexed for 30 s at setting 5 on vortexer. A bath sonicator was used to ensure the sample is completely dissolved. Incubated the sample in the oven maintained at 37 °C for 1 h and 30 min with 1000 rpm shaking. Inverted the vial to mix the samples with condensed drops at the cap surface. Spun the sample down for 1 min. at 1000 g at room temperature in a centrifuge. Performed silylation by adding 80  $\mu\text{L}$  of 1% TMCS in (MSTFA) solution using a syringe and vortex for 10 s. Incubated the sample in the oven maintained at 37 °C for 30 min with 1000 rpm shaking. Inverted the vial to mix the samples with condensed drops at the cap surface. Spun the sample down for 5 min at 2000 g at room temperature in a centrifuge. Transferred the reacted solution into two vials with inserts.

An Agilent 7890A gas chromatograph coupled with a single quadrupole 5975C mass spectrometer (Agilent Technologies, Inc.) was used for all analyses. A HP-5MS column (30 m  $\times$  0.25 mm  $\times$  0.25  $\mu\text{m}$ ; Agilent Technologies) was used for untargeted analysis. Samples (1  $\mu\text{L}$ ) were injected in splitless mode, and the helium gas flow rate was determined by the Agilent Retention Time Locking function based on analysis of deuterated myristic acid (Agilent Technologies, Santa Clara, CA). The injection port temperature was held at 250 °C throughout the analysis. The GC oven was held at 60 °C for 1 min after injection, and the temperature was then increased to 325 °C by 10 °C/min, followed by a 10 min hold at 325 °C. Data were collected over the mass range of  $m/z$  50–600. A mixture of FAMES (C8–C28) was analyzed each day with the samples for retention index alignment purposes during subsequent data analysis.

#### Detection of sterols in urine

All samples were taken from control experiments made on cattle urine to detect the misuse of anabolic agents for livestock fattening. For details see EU Directive (88/146/EEC and 96/22/EC) prohibiting the use, in livestock farming, of certain substances having a hormonal action on animals bred within the European Union. Urine samples were processed with the method described in <sup>29</sup>.

GC-MS analysis was performed on a HP 6890 gas chromatograph coupled to a HP 5973 quadrupole mass analyzer (Hewlett-Packard, Palo Alto, CA, USA). A DB-5MS (30 m  $\times$  0.25 mm i.d., 0.25  $\mu\text{m}$ , Agilent, Palo Alto, CA, USA) column was used. For steroid separation, the following conditions were applied: injector 250 °C, splitless injection (1 min), source temperature (230 °C). The column flow rate was 1.5 mL/min (constant flow). The oven temperature was increased from 60 °C (1.5 min) to 220 °C at 40 °C/min, then to 240 °C (1 min) at 1 °C/min, then to 300 °C (1 min) at 20 °C/min. Mass spectra were recorded in the scan mode ( $m/z$  50–550 mass range). The temperature of the transfer line was 280 °C.

#### Bacillus fungal biocontrol study, mixed cultures of *Bacillus subtilis* and *Setophoma terrestris* (dataset #21, Table S1)

Bacterial and fungal strains used in this study are: *Bacillus subtilis* ALBA01 (isolate from onion rhizosphere), variants of *B. subtilis* ALBA01 obtained after co-culture with *S. terrestris*, *Setophoma terrestris* PH06 (fungal strain isolated from onion rhizosphere). Bacterial strains were routinely grown in LB medium (10 g/L tryptone, 5 g/L yeast extract, 10 g/L NaCl) at 30°C.

Biological replicates of *Bacillus subtilis* pre and post-ST variants and of the fungus *S. terrestris* were cultivated individually and in co-cultures in 10 mL-borosilicate vials with a screw cap with

silicon septum containing 3 mL of PDA medium for seven days at 30°C and then analyzed with GC-MS to determine the emitted volatile metabolites. After incubation, the capped vials were stored at -80 °C and thawed immediately prior to analysis. The GC-MS analysis was carried out using the Agilent 7200 GC/QTOF equipped with a robotic sampler system. The separation was conducted on an HP-5MS column (30 m x 0.25 mm x 0.25 µm). The volatiles from the sample were extracted from headspace using Polydimethylsiloxane/Divinylbenzene (PDMS/DVB) df 65 µm Solid Phase Microextraction Fiber (SPME) for 30 min. at 50 °C. The fiber was then inserted into the injector equipped with Merlin septum heated to 250 °C and the adsorbed compounds were desorbed for 1 min. The GC protocol analysis included: cryofocusing on the head of the column at -20 °C for 1 min; 115 °C/min oven ramp to 40 °C (hold of 0.1 min), 20 °C/min oven ramp to 300 °C (hold of 0.1 min), ramp to 320 °C to purge the column. The helium carrier gas was set to constant 2 mL/min flow and a splitless injection mode was applied. The scanned *m/z* range was 35-400 with the acquisition rate of 20 spectra/s. The empty vial blanks were interspersed with the samples to assess background signal. Quality controls of natural mint oil extract were run along with samples before and after the analysis.

*Measurement of short chain fatty acids in fecal samples from patients with spondyloarthritis before and after treatment with biologic therapy (TNF inhibitor or IL-17A inhibitor; dataset #36, Table S1)*

Approximately 50 mg of sample were placed in 2 mL borosilicate vials capped with a screw cap with silicone septum. The capped vials were stored at -20 °C and thawed immediately prior to analysis. The GC-MS analysis was carried out using the Agilent 7200 GC/QTOF equipped with a robotic sampler system. The volatiles from the sample were extracted from headspace using Polydimethylsiloxane/Divinylbenzene (PDMS/DVB) df 65 µm Solid Phase Microextraction Fiber (SPME) for 30 min. at 50 °C. The fiber was then inserted into the injector equipped with Merlin septum heated to 250 °C and the adsorbed compounds were desorbed for 1 min. The separation was conducted on an HP-5MS column (30 m x 0.25 mm x 0.25 µm). The GC protocol analysis included: cryofocusing on the head of the column at -20 °C for 1 min; 115 °C/min oven ramp to 40 °C (hold of 0.1 min), 20 °C/min oven ramp to 300 °C (hold of 0.1 min), and 50 °C/min oven ramp to 320 °C purge the column. The helium carrier gas was set to constant 2 mL/min flow and a splitless injection mode was applied. The scanned *m/z* range was 35-400 with the acquisition rate of 10 spectra/s. The empty vial blanks were interspersed with the samples to assess background signal. Quality controls of natural mint oil extract were run along with samples before the analysis. Samples spiked with a 2.5 µL aliquot of standard mix of short chain fatty acids was analyzed along with the samples. The samples were randomized during the analysis.

*Measurement of medium chain fatty acids in fecal samples from patients with spondyloarthritis before and after treatment with biologic therapy (TNFi inhibitor or IL-17A inhibitor; dataset # 37, Table S1).*

HPLC grade methanol, MTBSTFA (*N*-*tert*-Butyldimethylsilyl-*N*-methyltrifluoroacetamide with 1% *tert*-Butyldimethylchlorosilane (tBDMCS)]; short chain fatty acids were obtained from Sigma-Aldrich, St. Louis, USA. Post-thawing, human fecal (50 mg) were sequentially extracted using solvent extraction with 100 µL 100 % methanol (HPLC grade) followed by sonication for 10 min. and centrifugation (12000 rpm, 5 min.). Supernatant was then transferred to a new 1.7 mL tube and the samples were lyophilized followed by resuspension in 50 µL MTBSTFA (with 1%

tBDMCS). After sonication (5 min.) and centrifugation (12000 rpm, 10 min.) the prepared samples were placed in a 200  $\mu$ L insert in 2 mL borosilicate vials and capped with a screw cap with silicone septum. The samples were stored at -20  $^{\circ}$ C and thawed immediately prior to analysis. The GC-MS analysis was carried out using the Agilent 7200 GC/QTOF equipped with a robotic sampler system. The separation was conducted on an HP-5MS column (30 m x 0.25 mm x 0.25  $\mu$ m). A 1  $\mu$ L aliquot of sample was injected with split 1:10, injector set at 250  $^{\circ}$ C. The GC protocol analysis included: solvent delay of 3.5 min; starting temperature of 50  $^{\circ}$ C; 30  $^{\circ}$ C/min oven ramp to 170  $^{\circ}$ C (hold 1 min), 15  $^{\circ}$ C/min oven ramp to 300  $^{\circ}$ C and 15  $^{\circ}$ C/min oven ramp to 310  $^{\circ}$ C with 3 min hold to purge the column. The helium carrier gas was set to constant 1.2 mL/min flow. The scan  $m/z$  range was 35-400 with the acquisition rate of 10 spectra/s. The derivatizing agent and empty vial blanks were interspersed with the samples to assess background signal. Samples spiked with a 2.5  $\mu$ L aliquot of standard mix of short chain fatty acids was analyzed along with the samples. The samples were randomized during the analysis.

30

### Other datasets

The data that have been previously published with methods described in the corresponding manuscript are listed in the **Table S1**: The methods for the datasets #1-10 are described in <sup>31,32</sup>. The data are published in: datasets #1(MSV000084033)<sup>30</sup>, #2(MSV000084033), #3(MSV000084034)<sup>33</sup>, #4(MSV000084036)<sup>34</sup>, #5(MSV000084032)<sup>35</sup>, #6(MSV000084038)<sup>36</sup>, #7(MSV000084042)<sup>36</sup>, #8(MSV000084039)<sup>32</sup>, #9(MSV000084040)<sup>37</sup>, #23(MSV000081340)<sup>38</sup>, #24(MSV000084348)<sup>39</sup>, #25(MSV000084378)<sup>40</sup>, #29(MSV000084350)<sup>41</sup>.

## **Generation of molecular networks**

### Repository-wide network

The data were collected across multiple studies as described in the **Supplementary Notes**. The datasets #1-38 (**Table S1**) were processed on GNPS MSHub deconvolution workflow as described in the tutorial. The .mgf output file for each dataset was downloaded individually (**Table S1**) and all of the files were combined into a single .mgf using the script available at [https://github.com/bittremieux/GNPS\\_GC/blob/master/src/merge\\_mgf.py](https://github.com/bittremieux/GNPS_GC/blob/master/src/merge_mgf.py). The combined file was then used as an input for the library search/molecular networking workflow. The graphml network file for the global network was downloaded and imported into Cytoscape software as described in the tutorial. The metadata regarding the datasets that include: Sample introduction mode, Derivatization status, Uberon/sample type, Instrument type, Data type (high resolution vs. low resolution), Data file format and Number of files in the dataset (**Table S1**) were imported into Cytoscape Version: 3.7.1. The **Figures 2, S9, S10** were prepared using Gephi software Version 0.9.2 (tutorial can be found at: <http://www.martingrandjean.ch/gephi-introduction/>). The graphml with metadata was exported from Cytoscape and imported into Gephi. The network was visualized using the "ForceAtlas2" layout with the following settings: Tolerance 1.0; Approximate Repul off; Scaling 1.0; Stronger Gravity off; Gravity 0.5; Dissuade Hubs on; LinLog mode off; Prevent Overlap on; Edge weight influence 1.0. The size of the node is proportional to the number of nodes that connected.

Library search for merged network:

<https://proteomics2.ucsd.edu/ProteoSAFe/status.jsp?task=8de1f720fd93476db728caa353f0fe50>

### Reference data network

**Figure S7** was created from the reference spectra as follows. Spectra from the NIST 17 reference library were classified by ClassyFire to create the full chemical ontology for all reference compounds. The pairwise cosine was then calculated for all of the spectra in the library. The reference spectra were filtered by down-selecting classes of interest and imported into the Cytoscape software for visualization.

### *Skin volatilome reference network and MolNetEnhancer for GC-MS*

The **Figure S8** was created from the dataset #19 in **Table S1** as follows. The graphml output of the GNPS library search job was downloaded from :

<https://proteomics2.ucsd.edu/ProteoSAFe/status.jsp?task=5d7f6a60f1a14126bfc8873231f4e7ca>

The MolNetEnhancer workflow was created to provide a high-level chemical overview based on chemical class annotations of molecular families discovered in electrospray ionization-mass spectrometry fragmentation (ESI-MS/MS) data by counting ClassyFire chemical ontology terms of collected candidate structures from compound databases searched by the parent masses of each node in a molecular family. Here, the MolNetEnhancer workflow was adapted to work with GC-MS data as follows: i) the input structures are recognised from InChIs rather than SMILES, and, most importantly ii) a maximum of  $k$  candidate structures for each node in a molecular family were retrieved from library matches that were based on the following criteria: the top-ranked (best scoring) matches based on cosine scoring with a minimum of  $u$  that also passed user-defined Kovats filtering criteria (if available), and finally iii) molecular family information was retrieved from the graphml network file to calculate the most predominant chemical ontology terms per family (i.e., superclass, class, subclass, etc.) before adding the chemical class annotations and ClassyFire<sup>42</sup> scores to the network file. Both  $k$  (Top Hits Per Spectrum) and  $u$  (Score Threshold) are defined by the user upon launching the GNPS-GC-MS Library Search and Molecular Networking job. The links to GNPS-GC-MS and MolNetEnhancer scripts are provided under the “Code availability” section.

## Comparison of deconvolution tools

### Deconvolution accuracy/annotation success

The deconvolution was conducted on the GNPS workflow for the MSHub; MZmine2/ADAP v2.53 and MS-DIAL v4.18 were deployed on a desktop computer with 12 CPUs and 248GB RAM. The deconvolution settings were optimized for MZmine2/ADAP v2.53 and MS-DIAL v4.18 and are given below. MSHub was run “as is”, with no parameters optimization. The deconvolution results from each tool were used as an input for GNPS library search workflow, which were launched with identical search settings and the same set of libraries including public

GNPS libraries and commercial NIST14 and Wiley. The links to workflows are listed in the **Supplemental Table S3**.

Deconvolution settings:

MS-DIAL

|                            |          |
|----------------------------|----------|
| Data type                  |          |
| Data type                  | Centroid |
| Ion mode                   | Positive |
| Accuracy type              | Nominal  |
|                            |          |
| Data collection parameters |          |
| Retention time begin       | 0        |
| Retention time end         | 100      |
| Mass range begin           | 0        |
| Mass range end             | 1000     |
|                            |          |
| Data processing            |          |
| Number of threads          | 2        |
|                            |          |
| Peak detection parameters  |          |

|                              |                             |
|------------------------------|-----------------------------|
| Smoothing method             | LinearWeightedMovingAverage |
| Smoothing level              | 3                           |
| Average peak width           | 20                          |
| Minimum peak height          | 1000                        |
| Mass slice width             | 0.5                         |
| Mass accuracy                | 0.5                         |
|                              |                             |
| MS1Dec parameters            |                             |
| Sigma window value           | 0.5                         |
| Amplitude cut off            | 1                           |
|                              |                             |
| Alignment parameters setting |                             |
| Retention time               | RT                          |
| Retention index tolerance    | 20                          |
| Retention time tolerance     | 0.1                         |
| EI similarity tolerance      | 60                          |
| Retention time factor        | 0.5                         |

|                                                                           |       |
|---------------------------------------------------------------------------|-------|
| El similarity factor                                                      | 0.5   |
| Peak count filter                                                         | 0     |
| QC at least filter                                                        | FALSE |
| Remove feature based on peak height fold-change                           | FALSE |
| Sample max / blank average                                                | 5     |
| Sample average / blank average                                            | 5     |
| Keep identified and annotated metabolites                                 | TRUE  |
| Keep removable features and assign the tag for checking                   | TRUE  |
| Replace true zero values with 1/2 of minimum peak height over all samples | FALSE |

#### MZmine2/ADAP

|                              |          |
|------------------------------|----------|
| Mass Detection               |          |
| Mass detector                | Centroid |
| Noise level                  | 100      |
|                              |          |
| ADAP Chromatogram builder    |          |
| Min group size in # of scans | 5        |



|                                                        |                     |
|--------------------------------------------------------|---------------------|
| Group intensity threshold                              | 1000                |
| Min highest intensity                                  | 1000                |
| M/z tolerance                                          | 0.001 Da, 0 ppm     |
|                                                        |                     |
| Chromatogram deconvolution                             |                     |
| M/z center calculation                                 | Median              |
| Algorithm                                              | Wavelets (ADAP)     |
| S/N threshold                                          | 10                  |
| S/N estimator                                          | Intensity window SN |
| Min feature height                                     | 1000                |
| Coefficient/Area threshold                             | 0                   |
| Peak duration range                                    | 0.0 - 0.5           |
| RT wavelet range                                       | 0.001 - 0.05        |
|                                                        |                     |
| Spectral Deconvolution / Multivariate Curve Resolution |                     |
| Deconvolution window width                             | 0.2                 |
| Retention time tolerance                               | 0.05                |

|                                   |                                  |
|-----------------------------------|----------------------------------|
| Minimum Number of Peaks           | 1                                |
| Adjust Apex Ret Time              | False                            |
|                                   |                                  |
| ADAP Aligner (GC)                 |                                  |
| Min confidence (between 0 and 1)  | 0.1                              |
| Retention time tolerance          | 0.5 (absolute)                   |
| M/z tolerance                     | 0.01 Da, 0 ppm                   |
| Score threshold (between 0 and 1) | 0.75                             |
| Score weight                      | 0.1                              |
| Retention time similarity         | Retention Time Difference (fast) |

Both derivatized and non-derivatized samples were selected for testing (**Supplemental Table S3**, the “GC-MS analysis for validation studies” section above). Considering that a mixture of spiked compounds would be limited and an inadequate representation of true biological complexity, we also selected datasets that are real biological mixtures with curated annotations. One such dataset (MSV000084039) is a derivatized mouse blood serum data described in<sup>43</sup>. These data were curated by the authors of the manuscript as described in<sup>43</sup> to generate a list of 128 compounds, as well as 13 spiked FAME standards. The list of curated annotations for this dataset is given in the **Supplemental Table S6**.

Another real biological dataset is MSV000084349 of beer aging (this data set is used by LECO in the development of the various data processing software tools). The compounds in the dataset were annotated if following requirements were met:

- Good hit in NIST library search, either as high forward similarity score or as high probability in cases of less abundant compounds with compromised spectra that are nevertheless characteristic.

- Retention index matches either the NIST 2017 RI within  $\pm 40$  units, or in the case of homologues that don't have an RI in NIST 2017, RI is within  $\pm 10$  units of expectation based on bracketing homologues.
- Mass accuracy of main spectral signals within  $\pm 15$  mDa of expectation, following mass recalibration of the acquired sample files, using siloxane and ubiquitous background ion masses.  $\pm 15$  mDa value was chosen as it excludes O vs. CH<sub>4</sub> exchange, and is possible for the Pegasus BT system (GC-TOFMS with resolving power about 1500) on which the data were collected. For  $m/z > 300$  this requirement is excessive for the Pegasus BT system, but is mitigated by a small number of analytes with such high mass in the beer headspace.
- Reasonable expectation of presence in beer, based on previous reports of the compound, compound class, or a chemical precursor or product in any kind of foodstuff.

The resultant curated list of 352 analytes generated using the above criteria is given in the **Supplemental Table S7**.

The results of GNPS library search jobs for each tool were downloaded (the links are given in **Supplemental Table S3**). Sparse patterns containing fewer than 10 peaks and poor matches with cosine below 0.7 were removed. In order to avoid ambiguities due to different possible names for the same compound, InChIKey was generated and matched for each annotation. The annotation was considered "correct" if it matched a compound on the corresponding curated list (**Supplemental Tables S6 and S7**). It is important to point out that in the cases of actual biological mixtures, that analytes in the sample cannot be called "confirmed". To call an analyte "confirmed" or "identified" (or anything similarly unequivocal) requires coelution with an independently authenticated pure reference material and that the normalized spectrum remains identical on standard addition. Even then, the "identity" can be questioned, especially if enantiomers, diastereomers, or structural isomers with indistinguishable physicochemical descriptors are possible. Failing the above requirements, including where necessary a demonstration that other possible isomers could be separated, analytes are "assigned" or "provisionally identified". In this regard, although the analyte assignments are as confident as possible for the state of the art GC-MS experiment, there certainly exists a possibility of erroneous annotation, especially where multiple isomers are reasonable candidate assignments. However, it is reasonable to be certain that for every analyte on the list, there is an actual, at least related compound that possesses the listed quantitative mass. To reflect this ambiguity, we also demonstrate annotation accuracy at the level of chemical subclass, as reported by ClassyFire<sup>42</sup>, instead of direct match (**Supplemental Figure S3**).

### Processing time

The MSHub, MZmine2/ADAP and MS-DIAL tools were tested with respect to the number of files that can be processed and processing time (deconvolution and alignment of features). For the test, the data were split into subsets of an increasing number of files (**Supplemental Table S4**). The settings of MZmine2/ADAP and MS-DIAL were optimized as above and kept the same for

all subsets. The three tools were deployed and run on the same system with 12 CPUs and 248 GB RAM and the time from launching the analysis till completion was recorded; the resulting times are plots are shown on **Figure S4**. MS-DIAL and MZMine failed once the dataset reaches a certain size; for the system used in the test this failure occurred at 502 files for MZmine and 75 files for MS-DIAL. MSHub successfully completed processing of all tested data.

## Generation of plots

**Figure 1 k,l:** Library search results and GNPS task metadata for the datasets Test1-Test11 (**Table S1**) were retrieved from GNPS (job links are listed in **Table S1**). Compound identifications in the InChi format were converted to canonical SMILES strings using RDKit and compared to a list of spiked-in compounds represented as SMILES strings. Cosine score densities for all identified compounds (**Figure 1k**) or for the identified compounds matching the spiked-in compounds (**Figure 1l**) for an increasing number of input files included in the analysis were plotted using the highest ranked identification for each scan in each run.

**Figure 2 m,n:** Library search results for the dataset Test11 (**Table S1**) were retrieved from GNPS (job links are listed in **Table S1**). The FDR was computed by considering the scans for which any of its top 10 identifications (based on cosine score) that matched the sub-classes of the spiked-in compounds, i.e. fatty acid esters or alkanes, as defined by ClassyFire as true positives, whereas scans for which this was not the case were considered false positives. The FDR was calculated at different cosine score thresholds ranging from 0.5 to 1 and balance score thresholds ranging from 0 to 100.

**Figure 2o:** Library search results for the dataset Test11 (**Table S1**) were retrieved from GNPS (job links are listed in **Table S1**). Compound identifications in the InChi format were converted to canonical SMILES strings using RDKit and compared to a list of spiked-in compounds represented as SMILES strings. The highest ranked identification for each scan in each run was considered, and the number of identifications matching the spiked-in compounds was calculated at different cosine score thresholds ranging from 0.5 to 1 and balance score thresholds ranging from 0 to 100.

**Figure 2p,q:** Library search results and GNPS task metadata for the datasets ICL1-ICL11 (**Figure 2p**) and the UCD1-UCD16 (**Figure 2q**) were retrieved from GNPS (job links are listed in **Table S1**). Compound identifications in the InChi format were converted to canonical SMILES strings using RDKit. Cosine score densities for an increasing number of files included in the analysis were plotted using the highest ranked identification for each scan in each run.

**Figure 1r,s:** Library search results and GNPS task metadata for the datasets ICL1-ICL11 (**Figure 2r**) and UCD1-UCD16 (**Figure 2s**) were retrieved from GNPS (job links are listed in **Table S1**). Compound identifications in the InChi format were converted to canonical SMILES strings using RDKit. The highest ranked identification for each scan in each run was considered,

and the number of unique compounds at different cosine score thresholds ranging from 0.5 to 1 was calculated for an increasing number of files included in the analysis.

**Supplemental Figure S1**: GNPS task metadata for the UCD1-UCD16 were retrieved from GNPS (job links are listed in **Table S1**). The deconvolution runtime (a) and the deconvolution runtime per file (b) were plotted for an increasing number of the files in the analyzed dataset.

**Supplemental Figure S3**: GNPS task metadata were retrieved from GNPS (job links are listed in the **Table S3**).

**Supplemental Figure S4**: GNPS task metadata were retrieved from GNPS (job links are listed in the **Table S4**).

## Supplementary Notes References

1. Dettmer, K., Aronov, P. A. & Hammock, B. D. Mass spectrometry-based metabolomics. *Mass Spectrometry Reviews* vol. 26 51–78 (2007).
2. Likić, V. A. Extraction of pure components from overlapped signals in gas chromatography-mass spectrometry (GC-MS). *BioData Mining* vol. 2 (2009).
3. Li, Z. *et al.* Morphological weighted penalized least squares for background correction. *The Analyst* vol. 138 4483 (2013).
4. Zhang, J., Gonzalez, E., Hestilow, T., Haskins, W. & Huang, Y. Review of Peak Detection Algorithms in Liquid-Chromatography-Mass Spectrometry. *Current Genomics* vol. 10 388–401 (2009).
5. Veselkov, K. A. *et al.* Recursive segment-wise peak alignment of biological (1)h NMR spectra for improved metabolic biomarker recovery. *Anal. Chem.* **81**, 56–66 (2009).
6. Gu, Q. & Veselkov, K. Bi-clustering of metabolic data using matrix factorization tools. *Methods* vol. 151 12–20 (2018).
7. Veselkov, K. *et al.* BASIS: High-performance bioinformatics platform for processing of large-scale mass spectrometry imaging data in chemically augmented histology. *Scientific Reports* vol. 8 (2018).
8. Tautenhahn, R., Patti, G. J., Rinehart, D. & Siuzdak, G. XCMS Online: A Web-Based Platform to Process Untargeted Metabolomic Data. *Analytical Chemistry* vol. 84 5035–5039 (2012).
9. Pluskal, T., Castillo, S., Villar-Briones, A. & Orešič, M. MZmine 2: Modular framework for processing, visualizing, and analyzing mass spectrometry-based molecular profile data. *BMC Bioinformatics* vol. 11 (2010).
10. Wenig, P. & Odermatt, J. OpenChrom: a cross-platform open source software for the mass spectrometric analysis of chromatographic data. *BMC Bioinformatics* **11**, 405 (2010).

11. Stein, S. E. An integrated method for spectrum extraction and compound identification from gas chromatography/mass spectrometry data. *Journal of the American Society for Mass Spectrometry* vol. 10 770–781 (1999).
12. Smirnov, A. *et al.* ADAP-GC 4.0: Application of Clustering-Assisted Multivariate Curve Resolution to Spectral Deconvolution of Gas Chromatography–Mass Spectrometry Metabolomics Data. *Analytical Chemistry* vol. 91 9069–9077 (2019).
13. Tsugawa, H. *et al.* MS-DIAL: data-independent MS/MS deconvolution for comprehensive metabolome analysis. *Nat. Methods* **12**, 523–526 (2015).
14. Skogerson, K., Wohlgemuth, G., Barupal, D. K. & Fiehn, O. The volatile compound BinBase mass spectral database. *BMC Bioinformatics* **12**, 321 (2011).
15. Tautenhahn, R., Böttcher, C. & Neumann, S. Highly sensitive feature detection for high resolution LC/MS. *BMC Bioinformatics* **9**, 504 (2008).
16. Lommen, A. & Kools, H. J. MetAlign 3.0: performance enhancement by efficient use of advances in computer hardware. *Metabolomics* **8**, 719–726 (2012).
17. He, Q. P., Wang, J., Mobley, J. A., Richman, J. & Grizzle, W. E. Self-calibrated warping for mass spectra alignment. *Cancer Inform.* **10**, 65–82 (2011).
18. Styczynski, M. P. *et al.* Systematic identification of conserved metabolites in GC/MS data for metabolomics and biomarker discovery. *Anal. Chem.* **79**, 966–973 (2007).
19. Amigo, J. M., Skov, T., Bro, R., Coello, J. & Maspocho, S. Solving GC-MS problems with PARAFAC2. *TrAC Trends in Analytical Chemistry* vol. 27 714–725 (2008).
20. Kessler, N. *et al.* MeltDB 2.0-advances of the metabolomics software system. *Bioinformatics* **29**, 2452–2459 (2013).
21. Domingo-Almenara, X. *et al.* eRah: A Computational Tool Integrating Spectral Deconvolution and Alignment with Quantification and Identification of Metabolites in GC/MS-Based Metabolomics. *Analytical Chemistry* vol. 88 9821–9829 (2016).
22. Kind, T. *et al.* FiehnLib: mass spectral and retention index libraries for metabolomics based



- on quadrupole and time-of-flight gas chromatography/mass spectrometry. *Anal. Chem.* **81**, 10038–10048 (2009).
23. Wishart, D. S. *et al.* HMDB 4.0: the human metabolome database for 2018. *Nucleic Acids Res.* **46**, D608–D617 (2018).
  24. Horai, H. *et al.* MassBank: a public repository for sharing mass spectral data for life sciences. *J. Mass Spectrom.* **45**, 703–714 (2010).
  25. Doran, S. L. F., Romano, A. & Hanna, G. B. Optimisation of sampling parameters for standardised exhaled breath sampling. *Journal of Breath Research* vol. 12 016007 (2017).
  26. Li, H., Jiang, T. & Zhang, K. Efficient and Robust Feature Extraction by Maximum Margin Criterion. *IEEE Transactions on Neural Networks* vol. 17 157–165 (2006).
  27. Bouslimani, A. *et al.* Molecular cartography of the human skin surface in 3D. *Proc. Natl. Acad. Sci. U. S. A.* **112**, E2120–9 (2015).
  28. Marques, L., Espinosa, M. H., Andrews, W. & Foster, R. T. Advancing Flavor Stability Improvements in Different Beer Types Using Novel Electron Paramagnetic Resonance Area and Forced Beer Aging Methods. *Journal of the American Society of Brewing Chemists* vol. 75 35–40 (2017).
  29. Buisson, C. *et al.* Application of stable carbon isotope analysis to the detection of 17 $\beta$ -estradiol administration to cattle. *Journal of Chromatography A* vol. 1093 69–80 (2005).
  30. Olmstead, K. I. *et al.* Insulin induces a shift in lipid and primary carbon metabolites in a model of fasting-induced insulin resistance. *Metabolomics* vol. 13 (2017).
  31. Fiehn, O. Metabolomics by Gas Chromatography-Mass Spectrometry: Combined Targeted and Untargeted Profiling. *Current Protocols in Molecular Biology* 30.4.1–30.4.32 (2016) doi:10.1002/0471142727.mb3004s114.
  32. Barupal, D. K. *et al.* A Comprehensive Plasma Metabolomics Dataset for a Cohort of Mouse Knockouts within the International Mouse Phenotyping Consortium. *Metabolites* **9**, (2019).

33. Fahrmann, J. F. *et al.* Investigation of metabolomic blood biomarkers for detection of adenocarcinoma lung cancer. *Cancer Epidemiol. Biomarkers Prev.* **24**, 1716–1723 (2015).
34. Miyamoto, S. *et al.* Systemic Metabolomic Changes in Blood Samples of Lung Cancer Patients Identified by Gas Chromatography Time-of-Flight Mass Spectrometry. *Metabolites* **5**, 192–210 (2015).
35. Wikoff, W. R. *et al.* Diacetylspermine Is a Novel Prediagnostic Serum Biomarker for Non-Small-Cell Lung Cancer and Has Additive Performance With Pro-Surfactant Protein B. *J. Clin. Oncol.* **33**, 3880–3886 (2015).
36. Liesenfeld, D. B. *et al.* Metabolomics and transcriptomics identify pathway differences between visceral and subcutaneous adipose tissue in colorectal cancer patients: the ColoCare study. *Am. J. Clin. Nutr.* **102**, 433–443 (2015).
37. Nagy-Szakal, D. *et al.* Insights into myalgic encephalomyelitis/chronic fatigue syndrome phenotypes through comprehensive metabolomics. *Sci. Rep.* **8**, 10056 (2018).
38. Quinn, R. A. *et al.* Neutrophilic proteolysis in the cystic fibrosis lung correlates with a pathogenic microbiome. *Microbiome* **7**, 23 (2019).
39. Quinn, R. A. *et al.* Niche partitioning of a pathogenic microbiome driven by chemical gradients. *Sci Adv* **4**, eaau1908 (2018).
40. Bouslimani, A. *et al.* Lifestyle chemistries from phones for individual profiling. *Proc. Natl. Acad. Sci. U. S. A.* **113**, E7645–E7654 (2016).
41. Obata, T., Florian, A., Timm, S., Bauwe, H. & Fernie, A. R. On the metabolic interactions of (photo)respiration. *J. Exp. Bot.* **67**, 3003–3014 (2016).
42. Djoumbou Feunang, Y. *et al.* ClassyFire: automated chemical classification with a comprehensive, computable taxonomy. *J. Cheminform.* **8**, 61 (2016).
43. Barupal, D. K. *et al.* A Comprehensive Plasma Metabolomics Dataset for a Cohort of Mouse Knockouts within the International Mouse Phenotyping Consortium. *Metabolites* **9**, (2019).
